# Supplementary material for: Clinical determinants of early parasitological response to ACTs in African patients with uncomplicated falciparum malaria: a literature review and meta-analysis of individual patient data
Source: BMC Med. 2015 Sep 7;13:212. doi: 10.1186/s12916-015-0445-x (PMC4561425; doi:10.1186/s12916-015-0445-x)
Supplement: Additional file 1: — References of all clinical trials and their study designs. (XLSX 1094 kb) [file 12916_2015_445_MOESM1_ESM.xlsx]

## Sheet: 1_ALl Published Trials
Author	Year	Title	Journal	Volume	Number	Pages	Abstract	Accession Number	Region	Country
Basavaraj, H. R.	1960	Observations on the treatment of 678 malaria cases with primaquine in an area free from maiaria transmission in Mysore State, India	Indian journal of malariology	14		269-81		13687558	Asia	India
Alving, A. S.;Johnson, C. F.;Tarlov, A. R.;Brewer, G. J.;Kellermeyer, R. W.;Carson, P. E.	1960	Mitigation of the haemolytic effect of primaquine and enhancement of its action against exoerythrocytic forms of the Chesson strain of Piasmodium vivax by intermittent regimens of drug administration: a preliminary report	Bulletin of the World Health Organization	22		621-31	Primaquine-an 8-aminoquinoline derivative-is one of the most effective drugs for use against the tissue stages of the malaria parasite. Unfortunately certain persons suffer from an inherited defect of metabolism which renders them susceptible to haemolysis after ingestion of the 8-aminoquinolines, certain other drugs and some vegetables. Susceptibility appears to be inherited by a partially domin…	13793053	Asia	Travellers
Eppes, R. B.;DeGowin, R. L.;Powell, R. D.;Legters, L. J.	1966	Clinical studies with a drug-resistant strain of Plasmodium falciparum from Vietnam	Military medicine	131	4	362-71		4955924	Asia	Vietnam
Jeffrey, G. M.;Gibson, F. D.	1966	Studies on chloroquine-resistance of Plasmodium falciparum in Upper Volta and Liberia, West Africa	Bulletin of the World Health Organization	35	3	441-9	The emergence of strains of Plasmodium falciparum resistant to normal dosages of chloroquine or other 4-aminoquinolines has caused concern in a number of malarious areas. Well-documented reports have confirmed this resistance in wide areas of South-East Asia and in some areas of South America. Occasional reports have been received from parts of West Africa, and the present investigation sought to…	5336037	Africa	Multicentred
Comer, R. D.;Young, M. D.;Porter, J. A., Jr.;Gauld, J. R.;Merritt, W.	1968	Chloroquine resistance in Plasmodium falciparum malaria on the Pacific coast of Colombia	The American journal of tropical medicine and hygiene	17	6	795-9		4881949	S.America	Colombia
Walker, A. J.;Lopez-Antunano, F. J.	1968	Response to drugs of South American strains of Plasmodium falciparum	Transactions of the Royal Society of Tropical Medicine and Hygiene	62	5	654-67		4884637	S.America	Brazil
McNamara, J. V.;Rieckmann, K. H.;Stockert, T. A.;Frischer, H.;Carson, P. E.;Powell, R. D.	1968	Clinical studies on chloroquine-resistant Plasmodium falciparum	La Clinica terapeutica	44	5	389-404		4903977	NA	NA
Martelo, O. J.;Smoller, M.;Saladin, T. A.	1969	Malaria in American soldiers	Archives of internal medicine	123	4	383-7		4888124	Travellers	Travellers
Fisher, G. U.;M. P. Gordon;H. O. Lobel;K. Runcik	1970	Malaria in soldiers returning from Vietnam. Epidemiologic, therapeutic, and clinical studies	The American journal of tropical medicine and hygiene	19	1	27-39		4906509	Asia	Travellers
Laing, A. B.	1970	Studies on the chemotherapy of malaria. I. The treatment of overt falciparum malaria with potentiating combinations of pyrimethamine and sulphormethoxine or dapsone in The Gambia	Transactions of the Royal Society of Tropical Medicine and Hygiene	64	4	562-8		4922132	Africa	Gambia
Andre, R. G.;Cadigan, F. C., Jr.;Fredericks, H. J.;Fong, Y. L.	1972	In vivo and in vitro studies of chloroquine-resistant malaria in West Malaysia	Transactions of the Royal Society of Tropical Medicine and Hygiene	66	4	644-52		4561008	Asia	Malaysia
Contacos, P. G.;Coatney, G. R.;Collins, W. E.;Briesch, P. E.;Jeter, M. H.	1973	Five day primaquine therapy--an evaluation of radical curative activity against vivax malaria infection	The American journal of tropical medicine and hygiene	22	6	693-5		4583162	Asia	Multicentred
Storey, J.;Rossi-Espagnet, A.;Mandel, S. P.;Matsushima, T.;Lietaert, P.;Thomas, D.;Brogger, S.;Duby, C.;Gramiccia, G.	1973	Sulfalene with pyrimethamine and chloroquine with pyrimethamine in single-dose treatment of Plasmodium falciparum infections. A trial in a rural population in northern Nigeria	Bulletin of the World Health Organization	49	3	275-82	A comparative trial was carried out in northern Nigeria of the ability of the drug combinations chloroquine-pyrimethamine and sulfalene-pyrimethamine to clear the peripheral blood stream of asexual forms of P. falciparum within 7 days. The reappearance of asexual P. falciparum forms within the 70-day follow-up period and the occurrence of vomiting during the 2-3 hours following administration of …	4603037	Africa	Nigeria
Kaplan, M. H.;L. S. Bernstein	1974	Improved therapy for Vietnam acquired vivax malaria	Military medicine	141	6	444-8		4208718	Asia	Travellers
Fasan, P. O.;Kofie, B. A.;Adeleye, I.;Cooke, A.	1974	Orally administered amodiaquine base suspensions in the treatment of acute malaria infections of young children in Nigeria	The Journal of tropical medicine and hygiene	77	10	239-43		4444062	Africa	Nigeria
Miller, L. H.;D. J. Wyler;R. H. Glew;W. E. Collins;P. G. Contacos	1974	Sensitivity of four Central American strains of Plasmodium vivax to primaquine	The American journal of tropical medicine and hygiene	23	2	309-10		4594075	S.America	Travellers
Contacos, P. G.;Collins, W. E.;Chin, W.;Jeter, M. H.;Briesch, P. E.	1974	Combined chloroquine-primaquine therapy against vivax malaria	The American journal of tropical medicine and hygiene	23	2	310-2		4594076	Asia	Vietnam
Segal, H. E.;Chinvanthananond, P.;Laixuthai, B.;Phintuyothin, P.;Pearlman, E. J.;Na-Nakorn, A.;Castaneda, B. F.	1974	Preliminary study of WR 33063 in the treatment of falciparum malaria in northeast Thailand	The American journal of tropical medicine and hygiene	23	4	560-4		4603134	Asia	Thailand
Miller, L. H.;Glew, R. H.;Wyler, D. J.;Howard, W. A.;Collins, W. E.;Contacos, P. G.;Neva, F. A.	1974	Evaluation of clindamycin in combination with quinine against multidrug-resistant strains of Plasmodium falciparum	The American journal of tropical medicine and hygiene	23	4	565-9		4603135	Asia	Travellers
Sucharit, P.;Harinasuta, T.;Kasemsuth, R.;Chongsuphajaisiddhi, T.;Tongprasroeth, N.	1974	Preliminary report of in vitro and in vivo studies on Falciparum malaria in Thailand	The Southeast Asian journal of tropical medicine and public health	5	3	460-1		4610783	Asia	Thailand
Segal, H. E.;Chinvanthananond, P.;Laixuthai, B.;Pearlman, E. J.;Hall, A. P.;Phintuyothin, P.;Na-Nakorn, A.;Castaneda, B. F.	1975	Comparison of diaminodiphenylsulphonepyrimethamine and sulfadoxine-pyrimethamine combinations in the treatment of falciparum malaria in Thailand	Transactions of the Royal Society of Tropical Medicine and Hygiene	69	1	139-42		1096374	Asia	Thailand
Hall, A. P.;Segal, H. E.;Pearlman, E. J.;Phintuyothin, P.;Kosakal, S.	1975	Amodiaquine resistant falciparum malaria in Thailand	The American journal of tropical medicine and hygiene	24	4	575-80	Amodiaquine cured 38% (13/34) of patients with falciparum malaria in Southeast Thailand. Chloroquine cured 0% (0/13). The cure rates with amodiaquine were the same whether a 1.5 g or 2.0 g course was used. Most patients were resistant to amodiaquine at the RI level and to chloroquine at the RII level. In hospital, amodiaquine cleared parasitemia more frequently than did chloroquine. With the 2.0 …	1098499	Asia	Thailand
Doberstyn, E. B.;Hall, A. P.;Vetvutanapibul, K.;Sonkon, P.	1976	Single-dose therapy of Falciparum malaria using pyrimethamine in combination with diformyldapsone or sulfadoxine	The American journal of tropical medicine and hygiene	25	1	14-19	Patients with naturally acquired chloroquine-resistant falciparum malaria were studied in Thailand. The fixed combination of pyrimethamine 75 mg and sulfadoxine 1,500 mg (adult dose) cured 85% of patients with an average pretreatment parasite count of 60,000 per mm(3). The fixed combination of pyrimethamine 50 mg and 800 mg diformyldapsone (DFD) cured 43% of patients with an average pretreatment …	769572	Asia	Thailand
Armstrong, J. C.;Asfaha, W.;Palmer, T. T.	1976	Chloroquine sensitivity of Plasmodium falciparum in Ethiopia. I. Results of an in vivo test	The American journal of tropical medicine and hygiene	25	1	5-9	The in vivo response of Plasmodium falciparum to the WHO single test dose (10 mg/kg body weight) of chloroquine base was examined in Ethiopia at four localities where malaria was meso- or hyperendemic. Parasitemias cleared by the 3rd day after chloroquine administration in all of the 150 test subjects. No recrudescences were detected during the 6-day or 11-day follow-up periods. The value of the …	769574	Africa	Ethiopia
Clyde, D. F.;McCarthy, V. C.	1977	Radical cure of Chesson strain vivax malaria in man by 7, not 14, days of treatment with primaquine	The American journal of tropical medicine and hygiene	26	3	562-3	Glucose-6-phosphate dehydrogenase-normal adult volunteers infected with mosquito-bone Chesson strain vivax malaria were treated with chloroquine and primaquine during the initial attack. Administration of 60 mg (base) of primaquine daily for 7 days was as effective in preventing relapse as is the regimen customarily used for the radical cure of infections produced by this strain, namely, 30 mg da…	326072	NA	United States
Roy, R. G.;Chakrapani, K. P.;Dhinagaran, D.;Sitaraman, N. L.;Ghosh, R. B.	1977	Efficacy of 5-day radical treatment of P. vivax infection in Tamil Nadu	The Indian journal of medical research	65	5	652-6		336529	Asia	India
Saint-Yves, I. F.	1977	Comparison of treatment schedules for Plasmodium vivax infections in the Solomon Islands	Papua and New Guinea medical journal	20	2	62-5	A total of 26 patients infected with Solomon Islands strains of Plasmodium vivax was treated with one of three regimens of cloroquine-primaquine, in an attempt to determine the relapse patterns and the response to treatment of the local strains of parasite. The results suggest that the standard course of chloroquine-primaquine provides a radical cure for the strains of Plasmodium vivax from the S…	339599	Asia	Solomon Islands
Sucharit, P.;Harinasuta, T.;Chongsuphajaisiddhi, T.;Tongprasroeth, N.;Kasemsuth, R.	1977	In vivo and in vitro studies of chloroquine-resistant malaria in Thailand	Annals of tropical medicine and parasitology	71	4	401-5	Fourteen patients infected with falciparum malaria admitted to the Hospital for Tropical Diseases in Bangkok, Faculty of Tropical Medicine, Mahidol University, were studied. In vivo and in vitro methods were used to compare the effects of chloroquine on Plasmodium falciparum. The results showed that RI in vivo corresponded to samples containing chloroquine base 2.5-3.5 millimicromoles per ml of b…	339855	Asia	Thailand
Cedillos, R. A.;Warren, M.;Jeffery, G. M.	1978	Field evaluation of primaquine in the control of Plasmodium vivax	The American journal of tropical medicine and hygiene	27	3	466-72	Two regimens of primaquine in combination with amodiaquine have been compared with amodiaquine alone in known cases of Plasmodium vivax in an endemic area of El Salvador, C.A. A 5-day regimen of primaquine, with dosages based on an adult dose of 15 mg per day, produced a substantial reduction in the numbers of patients experiencing renewed parasite activity and in the number of parasitemias exper…	354416	S.America	El Salvador
Doberstyn, E. B.;Phintuyothin, P.;Noeypatimanondh, S.;Teerakiartkamjorn, C.	1979	Single-dose therapy of falciparum malaria with mefloquine or pyrimethamine-sulfadoxine	Bulletin of the World Health Organization	57	2	275-9	A single oral dose (1.5 g) of mefloquine hydrochloride cured all of 37 patients with falciparum malaria, and a single dose of pyrimethamine (75 mg) plus sulfadoxine (1.5 g) cured 34 of 38 patients. The rates at which parasitaemia and fever abated were similar for the two regimens but mefloquine was associated with a higher incidence of gastrointestinal side effects.	373903	Asia	Thailand
Roy, R. G.;Shanmugham, C. A.;Chakrapani, K. P.;Ganesan, A. V.	1979	Results of 5-day course of radical treatment of Plasmodium vivax in six districts of Tamil Nadu	The Indian journal of medical research	69		939-43		381191	Asia	India
Sucharit, P.;Suntharasamai, P.;Chintana, T.;Harinasuta, T.	1979	In vivo and in vitro studies of quinine sensitivity of Plasmodium falciparum in Thailand	The Southeast Asian journal of tropical medicine and public health	10	1	138-41	Forty-four patients with falciparum malaria were studied. Nine patients were given quinine orally at a daily dose of 1.5 gm base for a period of 14 days. The mean parasite clearance in all 9 patients was 3.3 days, and none had recrudescence in follow-up examinations for 31 days. The in vivo study of these 9 patients showed sensitivity to quinine which correlated with the in vitro test, with conce…	384545	Asia	Thailand
Dwivedi, S. R.;Sahu, H.;Yadava, R. L.;Roy, R. G.;Pattanayak, S.	1979	In vivo chloroquine sensitivity tests of Plasmodium falciparum in some parts of Uttar Pradesh and Haryana States	The Indian journal of medical research	70 Suppl		20-22		398332	Asia	India
Roy, R. G.;Raman, G.;Prasad, H. V.;Achutan, C.;Pattanayak, S.	1979	Results of in vivo chloroquine sensitivity tests in Plasmodium falciparum in some parts of Karnataka State	The Indian journal of medical research	70 Suppl		27-9		398334	Asia	India
Van Poucke, G.	1979	A comparative study on the use of intramuscular chloroquine and quinine (as Quinimax) in the treatment of uncomplicated falciparum malaria in adults	East African medical journal	56	4	158-62		487981	Africa	NA
Fasan, P. O.;Mabadeje, A. F.	1980	A controlled trial of a combination of chloroquine with paracetamol in the treatment of acute malaria in a semi-immune population	The Journal of tropical medicine and hygiene	83	5	191-3	A clinial trial comparing a single dose of a fixed drug combination containing chloroquine and paracetamol with chloroquine and paracetamol given as separate tablets has been conducted among 154 patients seen in the Endemic Disease Clinic of the Lagos University Teaching Hospital and at two other clinics in Nigeria. There was no statistically significant difference in the preference between the d…	7001038	Africa	Nigeria
Reacher, M.;Campbell, C. C.;Freeman, J.;Doberstyn, E. B.;Brandling-Bennett, A. D.	1981	Drug therapy for Plasmodium falciparum malaria resistant to pyrimethamine-sulfadoxine (Fansidar). A study of alternate regimens in Eastern Thailand, 1980	Lancet	2	8255	1066-9	A trial of drug regimens for treating Plasmodium falciparum malaria was conducted in a refugee camp in eastern Thailand where extensive 'Fansidar' (pyrimethamine-sulfadoxine) resistance had been demonstrated. The efficacy of quinine alone was compared to that of quinine combined with either fansidar or tetracycline. Quinine alone cleared the parasitaemia in 57 of 59 patients but failed to cure ap…	6118522	Asia	Thailand
Chongsuphajaisiddhi, T.;Sabcharoen, A.;Attanath, P.	1981	In vivo and in vitro sensitivity of Falciparum malaria to quinine in Thai children	Annals of tropical paediatrics	1	1	21-26	The study was carried out to assess the efficacy of quinine in children with Falciparum malaria in relation to in vitro sensitivity (measured in terms of minimum inhibitory concentration: MIC) and to trough serum levels of quinine during the course of treatment. Fifty children aged ten months to 12 years with Falciparum malaria were randomly divided into two groups. Group I: 24 children were trea…	6185041	Asia	Thailand
Aderounmu, A. F.;Salako, L. A.;Walker, O.	1981	Chloroquine sensitivity of Plasmodium falciparum in Ibadan, Nigeria: II. Correlation of in vitro with in vivo sensitivity	Transactions of the Royal Society of Tropical Medicine and Hygiene	75	5	637-9	Plasmodium falciparum malaria was treated in 82 children with 25 mg/kg chloroquine orally over three days. They were observed for 28 days during which blood films were examined periodically for malaria parasites. Asexual forms of P. falciparum, present in the blood films of all the patients before commencing treatment, disappeared rapidly and by the third day no parasites were seen in blood films…	7036425	Africa	Nigeria
Olatunde, A.;Salako, L. A.;Walker, O.	1981	The in vivo sensitivity of Plasmodium falciparum to chloroquine and to sulphadoxine-pyrimethamine combination in Ibadan, Nigeria	Transactions of the Royal Society of Tropical Medicine and Hygiene	75	6	848-50	Fifty-eight Nigerian children with Plasmodium falciparum malaria were allocated randomly into two groups and treated with either chloroquine (25 mg/kg over three days) or Fansidar (35 mg sulphadoxin (+ 1/20 pyrimethamine) per kg single dose)). They were observed for 28 days during which blood films were examined periodically for malaria parasites. Asexual forms of P. falciparum, which were presen…	7036438	Africa	Nigeria
Chongsuphajaisiddhi, T.;Sabchareon, A.	1981	Sulfadoxine-pyrimethamine resistant falciparum malaria in Thai children	The Southeast Asian journal of tropical medicine and public health	12	3	418-21	Sixty-eight children with uncomplicated falciparum malaria admitted to the Hospital for Tropical Diseases in Bangkok during April-December 1980 were randomly divided into 3 groups and given 3 regimens. Group 1 of 27 cases were treated with a single dose of sulfadoxine 20 mg per kg body wt and pyrimethamine 1.0 mg per kg body wt. Two cases (7.4%) were cured (S) while 4 cases (14.8%) showed RI fail…	7043751	Asia	Thailand
Nguyen-Dinh, P.;Spencer, H. C.;Chemangey-Masaba, S.;Churchill, F. C.	1982	Susceptibility of Plasmodium falciparum to pyrimethamine and sulfadoxine/pyrimethamine in Kisumu, Kenya	Lancet	1	8276	823-5	Field studies were conducted in Kisumu, Kenya, to assess the susceptibility of local strains of Plasmodium falciparum to pyrimethamine alone (by a standard 7-day in-vivo test and a 48 h in-vitro field test) and to sulfadoxine-pyrimethamine (by a 7-day in-vivo test). Both in-vivo (10/11) and in-vitro (19/21) tests demonstrated that pyrimethamine resistance was very common. Parasite susceptibility …	6122056	Africa	Kenya
Tin, F.;Hlaing, N.;Lasserre, R.	1982	Single-dose treatment of falciparum malaria with mefloquine: field studies with different doses in semi-immune adults and children in Burma	Bulletin of the World Health Organization	60	6	913-7	Different doses of mefloquine (20 and 30 mg/kg of body weight in children, and 750 and 1000 mg in adults) were tested in controlled clinical trials in 89 children and 60 adults who were semi-immune carriers of Plasmodium falciparum. There was no significant difference in the efficacy of the two doses, either in the children or in the adults. An RI-type resistance was found in 1 adult, when recrud…	6218927	Asia	Myanmar
Dixon, K. E.;Williams, R. G.;Pongsupat, T.;Pitaktong, U.;Phintuyothin, P.	1982	A comparative trial of Mefloquine and Fansidar in the treatment of falciparum malaria: failure of Fansidar	Transactions of the Royal Society of Tropical Medicine and Hygiene	76	5	664-7	Falciparum malaria in 104 Thai patients was treated with either Mefloquine or Fansidar and patients were examined for parasitaemia for the next 28 days. All but one of the 40 patients treated with Mefloquine were cured, but the cure rates for Fansidar were only 9 . 1% for the two-tablet regimen and 19 . 4% for the three-tablet regimen. Most failures were classified as RII. Serum sulpha levels ind…	6758224	Asia	Thailand
Darlow, B.;Vrbova, H.;Gibney, S.;Jolley, D.;Stace, J.;Alpers, M.	1982	Sulfadoxine-pyrimethamine for the treatment of acute malaria in children in Papua New Guinea. I. Plasmodium falciparum	The American journal of tropical medicine and hygiene	31	1	1-9	Chloroquine-resistant Plasmodium falciparum malaria is increasing in prevelance in Papua New Guinea and alternative therapies for acute malaria are being sought. A trial of sulfadoxine-pyrimethamine for the treatment of acute falciparum malaria in children has been carried out in Madang, Papau New Guinea. Eighty-five children were treated with sulfadoxine-pyrimethamine, either alone or in combina…	7036764	Asia	Papua New Guinea
Darlow, B.;Vrbova, H.;Gibney, S.;Jolley, D.;Stace, J.;Alpers, M.	1982	Sulfadoxine-pyrimethamine for the treatment of acute malaria in children of Papua New Guinea. II. Plasmodium vivax	The American journal of tropical medicine and hygiene	31	1	10-13	In Papua New Guinea, Plasmodium falciparum and P. vivax are common causes of acute malaria in children and P. malariae an uncommon cause. The increasing prevelance of chloroquine-resistant strains of P. falciparum in Papua New Guinea has prompted the search for alternatives to chloroquine as standard presumptive treatment. Sulfadoxine-pyrimethamine, either alone or in combination with a single do…	7036765	Asia	Papua New Guinea
Hansford, C. F.;Hoyland, J.	1982	An evaluation of co-trimoxazole in the treatment of Plasmodium falciparum malaria	South African medical journal	61	14	512-4	Two dosage schedules of co-trimoxazole, the standard antibacterial and a 2-day high-dose schedule, were compared with a standard course of chloroquine in the treatment of uncomplicated Plasmodium falciparum malaria. Parasites were cleared from the blood at similar rates, but pyrexia responded more slowly following the standard cotrimoxazole dose. No recrudescences were detected in those observed …	7038925	Africa	South Africa
Lal, H.	1982	A comparative trial of oral chloroquine and oral co-trimoxazole in vivax malaria in children	The American journal of tropical medicine and hygiene	31	3 Pt 1	438-40	Responses of parasitemia and fever in vivax malaria to standard doses of chloroquine and different dosage schedules of co-trimoxazole were compared in 165 children. Though both the drugs were effective, chloroquine was significantly faster in clearing parasitemia than all the dosage schedules of co-trimoxazole. No statistically significant difference was observed in rapidity of defervescence betw…	7044160	Asia	India
Onori, E.;Payne, D.;Grab, D.;Grab, B.;Horst, H. I.;Almeida, F. J.;Joia, H.	1982	Incipient resistance of Plasmodium falciparum to chloroquine among a semi-immune population of the United Republic of Tanzania. 1. Results of in vivo and in vitro studies and of an ophthalmological survey	Bulletin of the World Health Organization	60	1	77-87	The sensitivity of Plasmodium falciparum strains to chloroquine was tested in one locality in the north-east of the United Republic of Tanzania, where a chloroquine-medicated salt project has been implemented for chemosuppression for many years, and where large amounts of the drug have been available during the last decade for the treatment of malaria infections.Single doses of chloroquine (5 or …	7044590	Africa	Tanzania
Schwartz, I. K.;Payne, D.;Campbell, C. C.;Khatib, O. J.	1983	In-vivo and in-vitro assessment of chloroquine-resistant Plasmodium falciparum malaria in Zanzibar	Lancet	1	8332	1003-5	A population-based field study was conducted in Zanzibar Town, Zanzibar, Tanzania, to assess the in-vivo and in-vitro susceptibility to chloroquine of Plasmodium falciparum. Single-dose therapy with chloroquine (10 mg base/kg) failed to clear parasitaemia in 11 of 22 (50%) treated subjects, and a standard therapeutic regimen of chloroquine (25 mg base/kg) failed to clear parasitaemia in 11 of 32 …	6133056	Africa	Tanzania
Harinasuta, T.;Bunnag, D.;Wernsdorfer, W. H.	1983	A phase II clinical trial of mefloquine in patients with chloroquine-resistant falciparum malaria in Thailand	Bulletin of the World Health Organization	61	2	299-305	A double-blind, randomized, dose-finding, phase II mefloquine trial was carried out in 147 adult male patients suffering from acute, uncomplicated, falciparum malaria and admitted to the Hospital for Tropical Diseases, Bangkok, between January 1980 and April 1981. Mefloquine was administered as a single oral dose of 500, 750, or 1000 mg (base) in the form of the hydrochloride. The clinical and pa…	6345013	Asia	Thailand
Noeypatimanond, S.;Malikul, S.;Benjapong, W.;Duriyananda, D.;Ungkasrithongkul, M.	1983	Treatment of Plasmodium falciparum malaria with a combination of amodiaquine and tetracycline in Central Thailand	Transactions of the Royal Society of Tropical Medicine and Hygiene	77	3	338-40	A combination of the drugs amodiaquine and tetracycline was used in a clinical trial at Phrabuddhabat Hospital in Central Thailand for treating Plasmodium falciparum malaria. Of the 51 patients who completed the 28-day follow-up, 49 (96%) were cured; in two cases the parasitaemia was cleared within seven days of initial therapy but returned within 28 days (RI response). Only one patient experienc…	6353687	Asia	Thailand
Kofi, E. J. M.;Ulrich, A. M.;Rwabwogo-Atenyi, J.;Sheth, U. K.	1983	A double-blind comparative clinical trial of mefloquine and chloroquine in symptomatic falciparum malaria	Bulletin of the World Health Organization	61	4	713-8	A total of 99 male Zambian patients with symptomatic falciparum malaria were treated in a double-blind randomized manner with either mefloquine (1000 mg given in one day) or chloroquine (1500 mg given over 3 days). An S-type response was seen in all the chloroquine patients and 98% of the mefloquine group; one patient in the latter group (2%) showed an RI-type response, but the parasites obtained…	6354507	Africa	Zambia
de Souza, JM.	1983	A phase I clinical trial of mefloquine in Brazilian male subjects	Bulletin of the World Health Organization	61	5	809-14	A double-blind, randomized phase I clinical trial was carried out to compare mefloquine with sulfadoxine-pyrimethamine for safety and tolerance. Twenty adult male Brazilian subjects from areas endemic for malaria were studied for a period of 66 days, which included 2 days of basal studies and a 63-day follow-up after drug administration. Subjects received either mefloquine, given as a single oral…	6360400	S.America	Brazil
de Souza, JM.	1983	A phase II clinical trial of mefloquine in Brazilian male subjects	Bulletin of the World Health Organization	61	5	815-20	Mefloquine was compared with sulfadoxine-pyrimethamine for safety and efficacy in a randomized, double-blind clinical trial in adult males from a malaria-endemic area of Brazil. A total of 99 oligosymptomatic and symptomatic volunteers with Plasmodium falciparum parasitaemia took part in the trial; 49 were given 1000 mg of mefloquine and the remainder received 1500 mg of sulfadoxine plus 75 mg of…	6360401	S.America	Brazil
Chongsuphajaisiddhi, T.;Sabchareon, A.;Attanath, P.	1983	Treatment of quinine resistant falciparum malaria in Thai children	The Southeast Asian journal of tropical medicine and public health	14	3	357-62	A study was carried out to assess the efficacy of a modified 7 day course of quinine in children with falciparum malaria, in comparison with those of a 7 day course of quinine at standard dosage and a combination of a 7 day course of quinine and sulfadoxine-pyrimethamine, and in relation to the MIC, and to the serum levels of quinine during the course of treatment. Seventy seven children aged 2 y…	6362017	Asia	Thailand
Phillips, R. E.;Looareesuwan, S.;Karbwang, J.;Warrell, D. A.;White, N. J.;Kasemsarn, P.;Warhurst, D. C.	1984	Failure of chloroquine-erythromycin and chloroquine-tetracycline combinations in treatment of chloroquine-resistant falciparum malaria in eastern Thailand	Lancet	1	8372	300-2	In Eastern Thailand the increasing resistance of Plasmodium falciparum to all available antimalarial drugs prompted a reassessment of chloroquine in combination with either erythromycin or tetracycline. Both combinations had produced encouraging results in vitro, in experimental animal models, or in preliminary clinical trials. In patients with uncomplicated falciparum malaria presenting with mod…	6141378	Asia	Thailand
Watkins, W. M.;Sixsmith, D. G.;Spencer, H. C.;Boriga, D. A.;Kariuki, D. M.;Kipingor, T.;Koech, D. K.	1984	Effectiveness of amodiaquine as treatment for chloroquine-resistant Plasmodium falciparum infections in Kenya	Lancet	1	8373	357-9	Studies were conducted in Malindi, Kenya, to assess the response of Plasmodium falciparum to chloroquine and amodiaquine in vivo (by an extended 14-day test) and in vitro (with the Rieckmann micro test). In-vivo resistance was demonstrated in 19 of 69 (28%) infections treated with chloroquine, but in only 2 of 60 (3.3%) of those treated with amodiaquine (p less than 0.001). In-vitro resistance to…	6141423	Africa	Kenya
Spencer, H. C.;Oloo, A. J.;Watkins, W. W.;Sixsmith, D. G.;Churchill, F. C.;Koech, D. K.	1984	Amodiaquine more effective than chloroquine against Plasmodium falciparum malaria on Kenya coast	Lancet	1	8383	956-7		6143883	Africa	Kenya
Deloron, P.;Le, B. J.;Ramanamirija, J. A.	1984	Amodiaquine and chloroquine efficacy against Plasmodium falciparum in Madagascar	Lancet	1	8389	1303-4		6145017	Africa	Madagascar
Li, G. Q.;Arnold, K.;Guo, X. B.;Jian, H. X.;Fu, L. C.	1984	Randomised comparative study of mefloquine, qinghaosu, and pyrimethamine-sulfadoxine in patients with falciparum malaria	Lancet	2	8416	1360-1	A prospective trial in 80 patients randomly allocated to four antimalarial treatment regimens--mefloquine plus pyrimethamine-sulfadoxine ('Fansidar'); mefloquine plus qinghaosu; mefloquine, fansidar, and qinghaosu; and qinghaosu alone--was carried out on Hainan Island, China, in patients with chloroquine-resistant falciparum malaria. A radical cure with slight side-effects was obtained with meflo…	6150365	Asia	China
Spencer, H. C.;Watkins, W. M.;Sixsmith, D. G.;Koech, D. K.;Chulay, J. D.	1984	A new in vitro test for pyrimethamine/sulfadoxine susceptibility of Plasmodium falciparum and its correlation with in vivo resistance in Kenya	Bulletin of the World Health Organization	62	4	615-21	A useful in vitro method for field evaluation of Plasmodium falciparum sensitivity to pyrimethamine/sulfadoxine is described. Thirty-five Kenyan schoolchildren infected with P. falciparum were treated with this drug combination and followed up for 5 weeks. In vitro tests for sensitivity to these drugs and to chloroquine were performed before starting treatment. All infections cleared within 7 day…	6386209	Africa	Kenya
Tan, H. S.;Tan, P. E.	1984	Clinical efficacy of sulfadoxine-pyrimethamine in the treatment of falciparum malaria in Sabah, Malaysia	Annals of the Academy of Medicine Singapore	13	2	170-4	One hundred and ten consecutive patients with falciparum malaria were treated with Fansidar and primaquine. Of the 61 patients who were followed up at one week, 4 (6.6%) failed to clear their parasitaemia (1 R III and 3 R II treatment failures). Of the subsequent 40 patients who were seen again at one month, another 3 (7.5%) had recrudesced (R I treatment failure). A total of 7 patients thus expe…	6388486	Asia	Malaysia
Huei, B. L.;Shen, S. L.;Wang, K. S.;Gao, S. F.;Cao, S. Z.	1984	The radical efficacy of pyronaridine-primaquine combination in tertian malaria	Journal of parasitology & parasitic diseases	2	4	260-2		6394174	Asia	China
Kang, W. M.;Yang, R. Z.;Huang, R. Z.;Xu, H. Q.;Xie, C.;Liu, Q. H.;Ye, J. S.;Xi, Y. H.	1984	Observation on the efficacy of pyronaridine in vivax malaria	Journal of parasitology & parasitic diseases	2	4	263-4		6394175	Asia	China
Li, Y. Q.	1984	[Effect of qinghaosu by rectal administration in the treatment of vivax malaria]	Chinese Journal of Parasitology & Parasitic Diseases	2	4	279	-	6394177		China
Lapierre, J.;Coquelin, B.;Galal, A. A.;Dupouy-Camet, J.;Faurant, C.;Tourte-Schaefer, C.;Ancelle, T.;Heyer, F.	1984	Drug resistance of Plasmodium falciparum and Plasmodium vivax strains in Cambodia (Cardamone Massif). Morphological characteristics of Plasmodium vivax	Medecine tropicale : revue du Corps de sante colonial	44	4	339-49	The authors report some failures of chemoprophylaxis and curative treatment of Plasmodium falciparum and Plasmodium vivax malaria. These infections were contracted in the area of the cambodian-thai border by 8 Europeans treated by various regimens and 34 Cambodians treated by quinine. In the latter group, the quinine failure rate in Plasmodium falciparum infections was about 47% (RII or RIII?) an…	6394948	Asia	Cambodia
Walker, O.;Salako, L. A.;Obih, P. O.;Bademosi, K.;Sodeinde, O.	1984	The sensitivity of Plasmodium falciparum to chloroquine and amodiaquine in Ibadan, Nigeria	Transactions of the Royal Society of Tropical Medicine and Hygiene	78	6	782-4	An extended in vivo test of the sensitivity of Plasmodium falciparum to antimalarial drugs in Nigerian children showed no evidence of resistance to chloroquine and amodiaquine. However, the results of a small number of in vitro tests suggest a decreased sensitivity of the parasite to chloroquine when compared with the results of earlier studies in the same locality.	6398531	Africa	Nigeria
Appavoo, N. C.;Roy, R. G.;Kapali, V.	1984	Results of 3-day radical treatment of Plasmodium vivax in North Arcot and South Arcot Districts of Tamil Nadu	Indian journal of malariology	21	1	21-4		6399257	Asia	India
Raichowdhuri, A. N.;Sinha, S.;Bhuyya;Gajanana, A.;Baishya, K. K.	1984	Chloroquine resistance of Plasmodium falciparum in Sonapur PHC Area (Assam) detected by micro in vitro and in vivo tests	Indian journal of malariology	21	1	25-30		6399258	Asia	India
Wood, R.	1984	Chloroquine resistant Plasmodium falciparum malaria confirmed by in vivo testing in Lusaka	Medical journal of Zambia	18	4	5-6		6400678	Africa	Zambia
Harinasuta, T.;Bunnag, D.;Lasserre, R.;Leimer, R.;Vinijanont, S.	1985	Trials of mefloquine in vivax and of mefloquine plus 'fansidar' in falciparum malaria	Lancet	1	8434	885-8	Two randomised double-blind trials were conducted to examine the activity and tolerability of mefloquine alone and in combination with sulfadoxine/pyrimethamine (MSP). In one trial mefloquine was compared with chloroquine in 40 patients with Plasmodium vivax malaria and in the other one mefloquine was compared with MSP in 40 patients with P falciparum malaria. The former trial showed that both a …	2858743	Asia	Thailand
Hoffman, S. L.;Rustama, D.;Dimpudus, A. J.;Punjabi, N. H.;Campbell, J. R.;Oetomo, H. S.;Marwoto, H. A.;Harun, S.;Sukri, N.;Heizmann, P.;et al.	1985	RII and RIII type resistance of Plasmodium falciparum to combination of mefloquine and sulfadoxine/pyrimethamine in Indonesia	Lancet	2	8463	1039-40	2 of 36 Plasmodium falciparum infections were resistant (RII and RIII) in vivo to the combination of mefloquine (M) and sulfadoxine-pyrimethamine (SP) in Jayapura, Irian Jaya, Indonesia. Expected absorption of mefloquine and pyrimethamine was confirmed in the one resistant patient from whom sera were available, and the isolate from this patient was sensitive to mefloquine in vitro. Only 2 of 41 i…	2865518	Asia	Indonesia
Dixon, K. E.;Pitaktong, U.;Phintuyothin, P.	1985	A clinical trial of mefloquine in the treatment of Plasmodium vivax malaria	The American journal of tropical medicine and hygiene	34	3	435-7	A clinical field trial was conducted to determine if mefloquine is effective in the treatment of malaria due to Plasmodium vivax. Forty patients with P. vivax malaria were treated with either mefloquine, chloroquine or chloroquine plus primaquine and followed for 28 days. All patients responded rapidly and were cured. There were no significant side effects.	3890575	Asia	Thailand
Nguyen-Dinh, P.;Schwartz, I. K.;Sexton, J. D.;Egumb, B.;Bolange, B.;Ruti, K.;Nkuku-Pela, N.;Wery, M.	1985	In vivo and in vitro susceptibility to chloroquine of Plasmodium falciparum in Kinshasa and Mbuji-Mayi, Zaire	Bulletin of the World Health Organization	63	2	325-30	From April to June 1983, combined in vivo and in vitro studies were conducted to assess the response to chloroquine of Plasmodium falciparum in Kinshasa and Mbuji-Mayi, Zaire. A total of 109 patients were treated with chloroquine, either as a single dose of 10 mg/kg or as a full dose of 25 mg/kg. All patients rapidly cleared their asexual parasitaemia, no recurrence being noted during the subsequ…	3893776	Africa	Democratic Republic of Congo
Ekue, J. M.;Simooya, O. O.;Sheth, U. K.;Wernsdorfer, W. H.;Njelesani, E. K.	1985	A double-blind clinical trial of a combination of mefloquine, sulfadoxine and pyrimethamine in symptomatic falciparum malaria	Bulletin of the World Health Organization	63	2	339-43	Fansimef is a combination of 250 mg of mefloquine, 500 mg of sulfadoxine, and 25 mg of pyrimethamine per tablet. A total of 150 adult male Zambian patients who had symptomatic Plasmodium falciparum parasitaemia were treated in a double-blind randomized fashion with either one, two or three tablets of Fansimef. All patients in the three treatment groups showed an S-type response. The rates of clea…	3893778	Africa	Zambia
de Souza, JM; Sheth, UK; de Oliveira, RM; Roulet, H; de Souza SD.	1985	An open, randomized, phase III clinical trial of mefloquine and of quinine plus sulfadoxine-pyrimethamine in the treatment of symptomatic falciparum malaria in Brazil	Bulletin of the World Health Organization	63	3	603-9	The clinical and parasitological response of adult male patients to mefloquine and to a combination of quinine and sulfadoxine-pyrimethamine during the treatment of falciparum malaria was compared. These patients were from an area in Brazil where Plasmodium falciparum is showing increasing resistance to quinine and to sulfadoxine-pyrimethamine. The drugs were administered to 100 patients (50 in e…	3899397	S.America	Brazil
de Souza, JM;Sheth, UK; de Oliveira, RM; Gomes, AT; Cavalcante EQ.	1985	A phase I clinical trial of Fansimef (mefloquine plus sulfadoxine-pyrimethamine) in Brazilian male subjects	Bulletin of the World Health Organization	63	3	611-5	A double-blind, randomized phase I clinical trial was carried out to compare Fansimef (a fixed-dose combination of mefloquine, sulfadoxine, and pyrimethamine) with sulfadoxine and pyrimethamine (Fansidar) for safety and tolerance. Twenty adult male Brazilian subjects from malaria endemic areas were studied for a period of 66 days, which included 2 days before and 63 days after drug administration…	3899398	S.America	Brazil
Huang, Q. L.	1985	A successive survey on the sensitivity of P. falciparum patients to chloroquine by in vitro microtechnic and in vivo test on Hainan Island	Chinese journal of preventive medicine	19	4	220-2		3902404	Asia	China
Kuznetsov, R. L.;Kilama, V.;Pein, D.;Kampbell, S. S.;Stori, D.	1985	Effectiveness of treatment with chloroquine, fansidar and dabequin of Plasmodium falciparum carriers, residing in a hyperendemic focus of malaria (the city of Bagamoyo, Northeastern Tanzania)	Meditsinskaia parazitologiia i parazitarnye bolezni		4	15-19		3903459	Africa	Tanzania
An, C.;Ozeretskovskaia, N. N.;Shcherbakov, A. M.;Fan, V. T.;Rabinovich, S. A.	1985	Effectiveness and tolerance of a quinine and fansidar combination in the treatment of tropical malaria in the South of the Socialist Republic of Vietnam	Meditsinskaia parazitologiia i parazitarnye bolezni		4	19-24		3903460	Asia	Vietnam
Lwin, M.;Htut, Y.;Oo, M.	1985	The in vivo and in vitro sensitivity of Plasmodium falciparum to quinine	The Southeast Asian journal of tropical medicine and public health	16	2	214-8	The in vivo and in vitro sensitivity of P. falciparum to quinine were studied simultaneously on 20 isolates of P. falciparum from infected patients in Rangoon and in Tharrawaddy Township. The in vivo study showed 85% sensitive and 5% resistance at RI level. The peak plasma quinine level in all the cases were above mean MIC on days 1, 3, 5 and 7. Schizont maturation was inhibited at 128 p.mol/well…	3906916	Asia	Myanmar
Ngimbi, N. P.;Wery, M.;Henry, M. C.;Mulumba, M. P.	1985	In vivo response to chloroquine during the treatment of Plasmodium falciparum malaria in a suburban region of Kinshasa, Zaire	Annales de la Societe belge de medecine tropicale	65 Suppl 2		123-35		3907530	Africa	Democratic Republic of Congo
Deloron, P.;Le, B. J.;Ramanamirija, J. A.;Coulanges, P.	1985	Plasmodium falciparum in Madagascar: in vivo and in vitro sensitivity to seven drugs	Annals of tropical medicine and parasitology	79	4	357-65	The sensitivity level of Plasmodium falciparum isolates to chloroquine and the activity of six other antimalarials were studied in the different climatic zones of Madagascar in 1983. In vivo tests were done with 10 and 25 mg kg-1 of chloroquine and amodiaquine. Early recrudescence or RII resistance was observed after treatment with 10 mg kg-1 of these drugs in 34% of the cases for chloroquine and…	3907555	Africa	Madagascar
Kilimali, V. A.;Mkufya, A. R.	1985	In vivo and in vitro assessment of the sensitivity of Plasmodium falciparum to chloroquine in four districts of Tanga region, Tanzania	Transactions of the Royal Society of Tropical Medicine and Hygiene	79	4	478-81	The sensitivity of Plasmodium falciparum to chloroquine was tested in Muheza, Pangani, Tanga and Korogwe districts in north-eastern Tanzania by applying both in vivo and in vitro tests in schoolchildren. A total dose of 25 mg chloroquine base/kg body-weight given over a period of three days (10 mg/kg on days 0 and one; and 5 mg/kg on day 2) failed to clear asexual parasites from the peripheral bl…	3909552	Africa	Tanzania
Kilimali, V. A.;Mkufya, A. R.	1985	In vivo assessment of the sensitivity of Plasmodium falciparum to sulphadoxine/pyrimethamine combination (Fansidar) in six localities in Tanzania where chloroquine-resistant P. falciparum has been detected	Transactions of the Royal Society of Tropical Medicine and Hygiene	79	4	482-3	The sensitivity of Plasmodium falciparum strains to Fansidar (500 mg sulphadoxine/25 mg pyrimethamine) was tested in vivo in six localities in the United Republic of Tanzania where chloroquine-resistant P. falciparum strains have been demonstrated by both in vivo and in vitro tests. Single doses as recommended by the manufacturers achieved 100% clearance of parasitaemia in five localities with me…	3909553	Africa	Tanzania
Ramanamirija, J. A.;Deloron, P.;Biaud, J. M.;Le, B. J.;Coulanges, P.	1985	In vivo and in vitro sensitivity to 4-aminoquinolines of Plasmodium falciparum in Madagascar: results of 2 years' study	Bulletin de la Societe de pathologie exotique et de ses filiales	78	5	606-14	563 cases of Falciparum malaria were detected in 1984 and 1985 in 7 malarial zones covering 3 climatic regions in Madagascar. All subjects underwent a therapeutic test; 175 strains of Plasmodium falciparum were isolated for in vitro drug sensitivity studies. 28 strains which were moderately chloroquine resistant in vitro were identified in 1983 in these various zones. However, 16% strains studied…	3910289	Africa	Madagascar
Botero, D.;Restrepo, M.;Montoya, A.	1985	Prospective double-blind trial of two different doses of mefloquine plus pyrimethamine-sulfadoxine compared with pyrimethamine-sulfadoxine alone in the treatment of falciparum malaria	Bulletin of the World Health Organization	63	4	731-7	This double-blind study is based on the treatment of 75 adult male patients suffering from Plasmodium falciparum malaria in Medellin, Colombia, a city in which there is no malaria transmission. The patients, who came from regions with high resistance to antimalarials, were divided into three groups receiving single-dose treatment as follows: a combination of 280 mg mefloquine, 800 mg sulfadoxine …	3910296	S.America	Colombia
Li, G. Q.;Guo, X. B.;Jian, H. X.;Fu, L. C.;Shen, L. C.;Li, R. S.;Dai, B. Q.;Li, Z. L.	1985	Observation on the efficacy of qinghaosu suppository in 100 cases of falciparum malaria	Journal of traditional Chinese medicine	5	3	159-61		3910966	Asia	Democratic Republic of Congo
Alcantara, A. K.;Uylangco, C. V.;Sangalang, R. P.;Cross, J. H.	1985	A comparative clinical study of mefloquine and chloroquine in the treatment of vivax malaria	The Southeast Asian journal of tropical medicine and public health	16	4	534-8	Forty-six patients with Plasmodium vivax malaria were evaluated for their clinical and parasitological response to the two single doses of mefloquine in comparison with the standard 3-day treatment with chloroquine. The patients were randomly distributed into 3 groups. Group 1 with 13 patients were treated with a single dose 250 mg mefloquine, Group 2 with 15 patients were treated with a single d…	3915155	Asia	Philippines
Reyes, S.;Osanai, C. H.;Passos, A. D.	1986	In vivo resistance of Plasmodium falciparum to 4-aminoquinolines and to a sulfadoxine-pyrimethamine combination. II. Study of Manaus, Amazonas 1983-1984	Revista brasileira de malariologia e doencas tropicais. Publicacoes avulsas	38		37-44		3077193	S.America	Brazil
Meek, S. R.;Doberstyn, E. B.;Gauzere, B. A.;Thanapanich, C.;Nordlander, E.;Phuphaisan, S.	1986	Treatment of falciparum malaria with quinne and tetracycline or combined mefloquine/sulfadoxine/pyrimethamine on the Thai-Kampuchean border	The American journal of tropical medicine and hygiene	35	2	246-50	Three different regimens were compared for treatment of falciparum malaria in displaced Kampucheans living in encampments on the Thai-Kampuchean border in 1983: single dose 750 mg mefloquine, 1.5 g sulfadoxine, 75 mg pyrimethamine (MSP); 600 mg quinine 8-hourly for 3 days and 500 mg tetracycline 8-hourly for 7 days (Q3T7); or 600 mg quinine 8-hourly for 7 days and 500 mg tetracycline 8-hourly for…	3513642	Asia	Thailand
Khoromana, C. O.;Campbell, C. C.;Wirima, J. J.;Heymann, D. L.	1986	In vivo efficacy of chloroquine treatment for Plasmodium falciparum in Malawian children under five years of age	The American journal of tropical medicine and hygiene	35	3	465-71	In 1984 the government of Malawi instituted a program to reduce malaria mortality and morbidity in children less than 5 years of age as a part of the Combatting Childhood Communicable Diseases (CCCD) program. To define the appropriate malaria therapy regimen, investigators used a quality assurance design in a simplified 7-day in vivo drug response study with follow-up observations on day 2 (D2), …	3518502	Africa	Malawi
Bjorkman, A.;Rombo, L.;Willcox, M.;Hanson, A. P.;Bengtsson, E.	1986	In vivo response of Plasmodium falciparum to different doses of chloroquine in semi-immune children in Liberia, West Africa	Annals of tropical medicine and parasitology	80	1	1-6	The efficacy of different doses of chloroquine in suppressing patent parasitaemia was investigated in 326 children two to 12 years old, living in six villages with holoendemic malaria. The children were given single doses (2, 3, 5-7 or 9-12 mg base kg-1) or a standard treatment over three days (25 mg base kg-1). Parasite prevalences were recorded after one, two, three, four, six and eight weeks. …	3524482	Africa	Liberia
Hedman, P.;Rombo, L.;Bjorkman, A.;Brohult, J.;Kihamia, C. M.;Potter, J.;Stenbeck, J.	1986	Sensitivity in vivo of Plasmodium falciparum to chloroquine and pyrimethamine/sulfadoxine in a coastal area of Tanzania	Annals of tropical medicine and parasitology	80	1	7-11	The in vivo response of Plasmodium falciparum to chloroquine and to pyrimethamine/sulfadoxine was studied for seven days in schoolchildren from two villages 30 to 40 km north of Dar es Salaam. Standard therapeutic regimen of chloroquine (25 mg base kg-1) failed to clear parasitaemia in 17 of 62 (27%) treated subjects. In contrast, standard treatment with pyrimethamine/sulfadoxine cleared the para…	3524485	Africa	Tanzania
Pe, T. M.;Tin, S.	1986	The efficacy of artemether (qinghaosu) in Plasmodium falciparum and P. vivax in Burma	The Southeast Asian journal of tropical medicine and public health	17	1	19-22	Seven sulfadoxine-pyrimethamine resistant Plasmodium falciparum infected patients and 2 patients with mixed (P. falciparum and P. vivax) infection were given Artemether. The results showed that Artemether is effective in sulfadoxine-pyrimethamine resistant malaria. The mean fever clearance time and parasite clearance time of patients treated with Artemether is shorter than those treated with chlo…	3526578	Asia	Myanmar
Karzin, V. V.;Bespiatov, V. F.	1986	In vivo sensitivity of Plasmodium falciparum to chloroquine in Bamako (the Republic of Mali)	Meditsinskaia parazitologiia i parazitarnye bolezni		4	19-21		3531795	Africa	Mali
Biaud, J. M.;Ramanamirija, J. A.;Ramiliarisoa, O.;Verdier, F.;Coulanges, P.;Le, B. J.	1986	Drug sensitivity of malaria in Madagascar. Comparison in vivo and in vitro of the effects of chloroquine and amodiaquine on P. falciparum in 1984	Archives de l'Institut Pasteur de Madagascar	52	1	73-84		3541818	Africa	Madagascar
Carme, B.;Benthein, F.;Moudzeo, H.;Bitsi, A.;Madzou, G.	1986	Drug resistance of Plasmodium falciparum in Congo. I. In vivo study with 10 and 25 mg/kg of chloroquine (235 tests)	Bulletin de la Societe de pathologie exotique et de ses filiales	79	4	490-502	An evaluation of chloroquine resistance in P. falciparum was conducted in four different areas of the People's Republic of the Congo during the months of October and November 1985. Using the simplified seven day in vivo test protocol, 235 tests were completed in 92 children aged three months to five years seen at the Maternal Child Health Clinics (54 children were treated by a single dose at 10 m…	3542258	Africa	Democratic Republic of Congo
Ebisawa, I.;Ohara, H.	1986	A combination of sulfamonomethoxine and pyrimethamine versus other drugs for the treatment of malaria	The Japanese journal of experimental medicine	56	5	213-9	Sixty-eight cases of vivax and 30 cases of falciparum malaria patients were treated with a combination of sulfamonomethoxine-pyrimethamine (MP tablet with 500 mg of sulfamonomethoxine and 25 mg of pyrimethamine) and the results were compared with those with chloroquine, Fansidar and quinine. Vivax malaria: Fever and parasites were cleared by the 4th day of treatment in 94 and 92% of the patients,…	3543442	Travellers	Travellers
Oloo, A. J.;Kamunvi, F.;Owaga, M. L.	1986	Response of falciparum malaria in vivo to a standard regimen of chloroquine in Kisumu District, Western Kenya	Transactions of the Royal Society of Tropical Medicine and Hygiene	80	4	532-3	The sensitivity of Plasmodium falciparum to chloroquine was studied in 140 children in two locations in Western Kenya. The standard WHO in vivo field test was used and chloroquine phosphate 25 mg base/kg administered in divided doses over three days. In one area 13.2% of cases had recrudescent parasitaemias, while in the other area 8.2% of infections were resistant, with 3.5% having an RII patter…	3544355	Africa	Kenya
Bjorkman, A.;Willcox, M.	1986	In vivo and in vitro susceptibility of Plasmodium falciparum to sulphadoxine/pyrimethamine in Liberia, West Africa	Transactions of the Royal Society of Tropical Medicine and Hygiene	80	4	572-4	The in vivo response of Plasmodium falciparum to standard treatment with sulphadoxine/pyrimethamine was studied in 19 hospital patients from Yekepa town with hypoendemic malaria and in 28 children, two to nine years old, living in a village with holoendemic malaria. In vitro tests were performed on eight isolates. In the hospital patients all parasites cleared with mean clearance time of 2.2 (ran…	3544359	Africa	Liberia
Menon, A.;Snow, R. W.;Otoo, L.;Greenwood, B. M.	1987	Decline in sensitivity of Plasmodium falciparum to chloroquine in The Gambia	Lancet	1	8540	1029-30		2883361	Africa	Gambia
Tanabe, K.;Ohtomo, H.; Otuji, Y.;Nakabayashi, T.; Tanaka, H.	1987	[A clinical evaluation of chloroquine on malaria in Japan]	The Journal of the Japanese Association for Infectious Diseases	61	9	1064-9	-	3127501	Asia	Japan
Rombo, L.; Edwards, G.;Ward, S.A.;Eriksson, G.; Lindquist, L.; Lindberg, A.; Runehagen, A.; Bjorkman, A.; Hylander, N.O	1987	Seven patients with relapses of Plasmodium vivax or P. ovale despite primaquine treatment	Tropical Medicine and Parasitology	38	1	49-50	Seven relapses of Plasmodium vivax or Plasmodium ovale despite standard treatment with primaquine (3.0 mg Kg-1) daily for fourteen days are presented. The majority of patients came from areas outside the countries where resistance to primaquine is well known. The various possibilities of reasons for relapses are discussed.	3299660
Chongsuphajaisiddhi, T.;Sabchareon, A.;Chantavanich, P.;Singhasivanon, V.;Attanath, P.;Wernsdorfer, W. H.;Sheth, U. K.	1987	A phase-III clinical trial of mefloquine in children with chloroquine-resistant falciparum malaria in Thailand	Bulletin of the World Health Organization	65	2	223-6	Mefloquine is a highly effective drug for the treatment of falciparum malaria among adults, but studies of its effects on children are lacking. An open, noncomparative trial of mefloquine was therefore carried out among 84 children aged 5-12 years who were patients at the Hospital for Tropical Diseases, Mahidol University, Bangkok, Thailand. The drug was administered as a single dose of 18-29 mg …	3301042	Asia	Thailand
Haegeman, F.;Martiny, P.;Wyffels, A.;Aazami, A.	1987	In vivo chloroquine sensitivity of Plasmodium falciparum in South West Niger	Annales de la Societe belge de medecine tropicale	67	1	67-70		3307650	Africa	Niger
Ohtomo, H.;A. Hioki;K. Tanabe;T. Nakabayashi;T. Ishizaki	1987	Clinical evaluation of antimalarial regimens in Japan	Zentralblatt fur Bakteriologie Mikrobiologie und Hygiene. Series A Medical microbiology infectious diseases virology parasitology	264	2011-04-03	513-20	The actual situation of the treatment of malaria for the past 10 years in Japan was investigated and analyzed. As a result, it was revealed that there were not a few cases which had been treated improperly probably because of the difficulty of getting antimalarial agents. Moreover, it was made clear that the death rate on falciparum malaria was constantly high, 8.7%, as expected and the relapse r…	3310468	Asia	Japan
Gascon, J.;Soldevila, M.;Merlos, A.;Bada, J. L.	1987	Pharmacoresistance of Plasmodium falciparum in Rwanda: an in vivo study	Biomedicine & pharmacotherapy	41	5	250-3	During the period of June to October 1985, a study in vivo was made on 162 patients suffering from malaria by P. falciparum, in order to evaluate the sensitivity of the parasite to the drugs: Chloroquine, Amodiaquine and Pyrimethamine-Sulfadoxine (Fansidar). As an alternative treatment, in the resistant cases, Quinine with Fansidar or Quinine with Tetracycline was given. The following cases of re…	3311192	Africa	Rwanda
de Souza, JM; Sheth, UK; Wernsdorfer, WH; Trigg, PI; Doberstyn, EB.	1987	A phase II/III double-blind, dose-finding clinical trial of a combination of mefloquine, sulfadoxine, and pyrimethamine (Fansimef) in falciparum malaria	Bulletin of the World Health Organization	65	3	357-61	Fansimef is a combination of 250 mg mefloquine (base), 500 mg sulfadoxine, and 25 mg pyrimethamine per tablet. One hundred and fifty adult male Brazilian patients at Belem (Para), who had peripheral blood smears positive for Plasmodium falciparum, with or without clinical symptoms of falciparum malaria, were treated in a double-blind randomized fashion with either one, two or three tablets of Fan…	3311438	S.America	Brazil
Harinasuta, T.;Bunnag, D.;Vanijanond, S.;Charoenlarp, P.;Suntharasmai, P.;Chitamas, S.;Sheth, U. K.;Wernsdorfer, W. H.	1987	Mefloquine, sulfadoxine, and pyrimethamine in the treatment of symptomatic falciparum malaria: a double-blind trial for determining the most effective dose	Bulletin of the World Health Organization	65	3	363-7	A total of 89 adult male Thai patients who had acute, uncomplicated falciparum malaria were treated in a double-blind randomized trial with a single oral dose of two or three tablets, each consisting of 250 mg mefloquine, 500 mg sulfadoxine, and 25 mg pyrimethamine (MSP). The two-tablet regimen produced a cure rate (S response) of 93%, the three-tablet regimen a cure rate of 98%. The mean duratio…	3311439	Asia	Thailand
Ekue, J. M.;Phiri, D. E.;Sheth, U. K.;Mukunyandela, M.	1987	A double-blind trial of a fixed combination of mefloquine plus sulfadoxine-pyrimethamine compared with sulfadoxine-pyrimethamine alone in symptomatic falciparum malaria	Bulletin of the World Health Organization	65	3	369-73	A total of 100 male Zambian patients with symptomatic falciparum malaria were treated with either two tablets of mefloquine plus sulfadoxine-pyrimethamine (Fansimef) or three tablets of sulfadoxine-pyrimethamine (Fansidar) as a single dose. The patients were kept under observation from day 0 (day of treatment) to day 28 and all were cured. An S-type of response was seen in all patients; one patie…	3311440	Africa	Zambia
Carme, B.;Mbitsi, A.;Moudzeo, H.;Ndinga, M.;Eozenou, P.	1987	Drug resistance of Plasmodium falciparum in the Congo. 2. Comparative study in vivo of chloroquine and amodiaquine in Brazzaville schoolchildren (November 1986)	Bulletin de la Societe de pathologie exotique et de ses filiales	80	3 Pt 2	426-33	This study was conducted in Brazzaville, the capital of Congo, for the purpose of assessing the resistance to chloroquine and amodiaquine of Plasmodium falciparum. 64 in vivo tests using the WHO protocol--trial period 7 days after administration over 3 days of a dose of 25 mg/kg (N = 31 for chloroquine, 33 for amodiaquine)--were performed in schoolchildren aged 6 to 7 years, with parasite counts …	3319250	Africa	Democratic Republic of Congo
Baudon, D.;Guiguemde, T. R.;Ouedraogo, J. B.	1987	Surveillance of the sensitivity of Plasmodium falciparum to chloroquine in Western Africa: value of in vivo tests using 5 and 10 mg/kg	Bulletin de la Societe de pathologie exotique et de ses filiales	80	3 Pt 2	469-76	Studies on the in vivo sensitivity of Plasmodium falciparum strains to chloroquine were carried out on shrub savanna areas of Burkina Faso, West Africa and were conducted from 1982 to 1986 in asymptomatic malarial school children. From the result of 431 in vivo tests using a single dose of only 5 or 10 mg/kg b. w. chloroquine base, it was concluded that there was a high sensitive response of P. f…	3319257	Africa	Burkina Faso
Le, B. J.;Simon, F.;Ramanamirija, J. A.;Calmel, M. B.;Hatin, I.;Deloron, P.;Porte, J.;Marchais, H.;Clausse, J. L.;Biaud, J. M.;et al.	1987	Sensitivity of Plasmodium falciparum to quinolines and therapeutic strategies: comparison of the situation in Africa and Madagascar between 1983 and 1986	Bulletin de la Societe de pathologie exotique et de ses filiales	80	3 Pt 2	477-89	One thousand and twenty six P. falciparum strains isolated from cases imported in France and field surveys in four regions of Africa and Madagascar were studied in vitro against chloroquine, monodesethylamodiaquine, quinine and mefloquine, 917 in vivo tests were performed during field studies with chloroquine (10 and 25 mg/kg) and amodiaquine (10, 25, 35 mg/kg). In Madagascar, the chemoresistance…	3319258	Africa	Multicentred
Bunnag, D.;Harinasuta, T.;Vanijanonta, S.;Looareesuwan, S.;Chittamas, S.;Punnavut, W.;Jochims, E.	1987	Slow-release quinidine in the treatment of chloroquine resistant falciparum malaria: a double-blind trial	Acta Leidensia	55		129-38		3321828	Asia	Thailand
Steketee, R. W.;Brandling-Bennett, A. D.;Kaseje, D. C.;Schwartz, I. K.;Churchill, F. C.	1987	In vivo response of Plasmodium falciparum to chloroquine in pregnant and non-pregnant women in Siaya District, Kenya	Bulletin of the World Health Organization	65	6	885-90	Chemoprophylaxis using chloroquine (CQ) in suppressive doses has been recommended to protect pregnant women in malarious areas from the adverse effects of malaria during pregnancy. In a malaria-endemic area of western Kenya with CQ-resistant Plasmodium falciparum, we determined the prevalence and density of falciparum infection in gravid and nulligravid women and compared the in-vivo parasite res…	3325186	Africa	Kenya
Che, L. G.;Huang, K. G.;Yang, H. L.;Yu, L.;Lin, Z. L.;Huang, R.	1987	Combined use of pyronaridine, sulfadoxine and primaquine in areas with chloroquine-resistant falciparum malaria	Chinese journal of parasitology & parasitic diseases	5	3	194-6		3329070	Asia	China
Heymann, D. L.;Khoromana, C. O.;Wirima, J. J.;Campbell, C. C.	1987	Comparative efficacy of alternative primary therapies for Plasmodium falciparum infections in Malawi	Transactions of the Royal Society of Tropical Medicine and Hygiene	81	5	722-4	In Malawi, where high levels of chloroquine resistance were shown using a modified 7-day in vivo test, amodiaquine and pyrimethamine-sulfadoxine were evaluated as alternative initial therapies for Plasmodium falciparum infections in children under 5 years old. Therapy success rates, judged by parasite clearance by day 7 after initiation of therapy, were significantly greater among 39 children tre…	3329780	Africa	Malawi
Marchais, H.;Ramanamirija, J. A.;Le, B. J.;Coulanges, P.	1987	In vivo and in vitro sensitivity to 4-aminoquinolines of Plasmodium falciparum in Madagascar: results of a study conducted on the east coast (July 1985-July 1986)	Archives de l'Institut Pasteur de Madagascar	53	1	43-62		3330414	Africa	Madagascar
Coulanges, P.;Le, B. J.;Deloron, P.;Ramanamirija, J. A.;Biaud, J. M.;Marchais, H.	1987	In vivo and in vitro study of the chemosensitivity of Plasmodium falciparum in Madagascar--1982-1986	Archives de l'Institut Pasteur de Madagascar	53	1	63-76		3330415	Africa	Madagascar
Tin, F.;Nyunt, H.;Lim, M. A.;Win, S.;Lasserre, R.	1987	Double-blind trial to find dose range using a fixed combination of mefloquine, sulfadoxine and pyrimethamine in falciparum malaria: a field study on adults in Burma	Transactions of the Royal Society of Tropical Medicine and Hygiene	81	6	910-2	In a field study conducted in Burma, 60 semi-immune adults were randomly assigned to 2 treatment groups. The first (mean parasite count, 12717/mm3) received a single dose of a fixed combination of 500 mg mefloquine base, 1000 mg sulfadoxine and 50 mg pyrimethamine (2 tablets of 'Fansimef') plus 1 tablet placebo. The second group (mean parasite count, 11 863/mm3) were given 3 tablets of the same m…	3332509	Asia	Myanmar
Passos, A. D.;Osanai, C. H.;Reyes, S.	1987	In vivo resistance of Plasmodium falciparum to 4-aminoquinolines and to a sulfadoxine-pyrimethamine combination. II--The Emperatriz study, Maranhao, 1983-1984	Revista da Sociedade Brasileira de Medicina Tropical	20	2	109-13		3333871	S.America	Brazil
Watt, G.;Long, G. W.;Padre, L.;Alban, P.;Sangalang, R.;Ranoa, C. P.;Laughlin, L. W.	1987	Amodiaquine less effective than chloroquine in the treatment of falciparum malaria in the Philippines	The American journal of tropical medicine and hygiene	36	1	3-8	Amodiaquine was compared to chloroquine in two groups of Filipino patients with uncomplicated falciparum malaria. Every patient received 25 mg/kg of base orally given over three days. In a hospital study, all eight patients receiving chloroquine cleared their parasitemia by day 6, but six of eight patients receiving amodiaquine failed to clear parasitemia and in four patients there was no respons…	3544892	Asia	Philippines
Simooya, O. O.;Aderounmu, A. F.;Salako, L. A.	1988	Sensitivity of Plasmodium falciparum to chloroquine, amodiaquine and mefloquine in Ibadan, Nigeria	African journal of medicine and medical sciences	17	1	3-7	The schizontocidal effect of chloroquine was compared to that of amodiaquine in vivo and mefloquine in vitro. In the in-vivo study, 32 patients were randomly given chloroquine whilst 29 received amodiaquine. The mean parasite clearance time was 2.5 days for chloroquine and 2.4 days for amodiaquine. These times were not significantly different. The cure rate in both groups up to day 14 was 100%. I…	2834931	Africa	Nigeria
Fadeke, A. A.;Salako, L. A.;Laoye, A. J.;Modupe, M. J.;Aina, A. R.	1988	Comparison of the susceptibility of falciparum malaria to mefloquine-sulphadoxine-pyrimethamine and chloroquine in Nigeria	African journal of medicine and medical sciences	17	4	195-200	In Nigeria chloroquine remains the drug of choice for the treatment of falciparum malaria since chloroquine resistance is not yet a problem. Nevertheless, in view of the rapid spread of multi-resistant Plasmodium falciparum in Africa, it is desirable to test alternative drugs for efficacy and safety. To this end we undertook a comparative controlled trial of the new triple combination, mefloquine…	2854365	Africa	Nigeria
Watkins, W. M.;Oloo, J. A.;Lury, J. D.;Mosoba, M.;Kariuki, D.;Mjomba, M.;Koech, D. K.;Gilles, H. M.	1988	Efficacy of multiple-dose halofantrine in treatment of chloroquine-resistant falciparum malaria in children in Kenya	Lancet	2	8605	247-50	Halofantrine hydrochloride given to 46 Kenyan children with falciparum malaria at 10 mg/kg for two doses, and to 60 other children at 8 mg/kg for three doses, resulted in rapid parasite clearance, mean parasite clearance times being 45.4 h and 54.8 h, respectively. In-vitro chemosensitivity tests showed that most infections were due to chloroquine-resistant parasites, and that parasite maturation…	2899237	Africa	Kenya
Wirima, J.;Khoromana, C.;Molyneux, M. E.;Gilles, H. M.	1988	Clinical trials with halofantrine hydrochloride in Malawi	Lancet	2	8605	250-2	Two clinical trials of the phenanthrene methanol compound halofantrine in the treatment of Plasmodium falciparum were conducted in Malawi, in areas where the parasite was known to be chloroquine resistant. In the first trial all 46 patients had symptoms of malaria and parasite densities ranging from 2500/microliter to 212,000/microliter. They were given a single dose of halofantrine hydrochloride…	2899238	Africa	Malawi
Maisonneuve, H.;Joly, F.;John, M.;Carles, G.;Rossignol, J. F.	1988	Efficacy of halofantrine in Plasmodium falciparum or Plasmodium vivax malaria in a resistance area (French Guiana)	Presse medicale	17	3	99-102	Halofantrine (WR 171.669) is a phenanthrene methanol derivative effective against the multidrug resistant strains of Plasmodium falciparum. One hundred and one patients, 48 men and 53 women, 53 adults and 48 children (less than or equal to 12 years old) aged from 1.5 to 57 years were treated. Fifty-one patients received a single 16 mg/kg dose and 50 patients received 24 mg/kg/day in 3 doses at 6-…	2964606	Africa	French Guyana
Mbanzulu, P. N.;Kadima, N.;Ngimbi, N. P.;Ngangoue, C.;Elenga, E.;Kaba, S.;Makengo, N.;Lokombe, B.;Miankanina, B.;Ngbege, T.	1988	Chemoresistance of Plasmodium falciparum in Kinshasha. In vivo tests and chloroquine absorption	Bulletin de la Societe de pathologie exotique et de ses filiales	81	1	83-7	With the test in vivo and the bleeding dosage of chloroquine, authors report the rate of resistance of chloroquine to Plasmodium falciparum. 2.3% of Plasmodium falciparum in Kinshasa are resistant to chloroquine.	3042178	Africa	Democratic Republic of Congo
Sabchareon, A.;Chongsuphajaisiddhi, T.;Sinhasivanon, V.;Chanthavanich, P.;Attanath, P.	1988	In vivo and in vitro responses to quinine and quinidine of Plasmodium falciparum	Bulletin of the World Health Organization	66	3	347-52	A total of 66 Thai children with uncomplicated falciparum malaria were treated orally with regimens of either quinine or quinidine. Radical cures were observed in 85% (28 of 33) of the children who received quinine and in 88% (29 out of 33) of those who received quinidine. Treatment failures in both groups were RI responses.The mean trough level of quinidine (10 mumol/l) was about 2.5-times less …	3048758	Asia	Thailand
Huang, O. L.;Ouyang, W. C.;Zhou, J. X.;Wu, Z.;Zhang, K. Y.;Huang, J. K.;Cai, X. Z.;Pang, X. J.;Fu, S. G.;Wang, X. F.;et al.	1988	Effectiveness of amodiaquine, sulfadoxine-pyrimethamine, and combinations of these drugs for treating chloroquine-resistant falciparum malaria in Hainan Island, China	Bulletin of the World Health Organization	66	3	353-8	The study was carried out in 1985-86 in Hainan Island where Plasmodium falciparum is resistant to chloroquine. Fifty cases of falciparum malaria were treated with 1800 mg amodiaquine for 3 days: the cure rate was 65.3%, and the mean time to clear fever and asexual parasitaemia was 30.7 and 60.3 hours, respectively; 34.7% of cases showed RI or RII recrudescence, and one patient's temperature did n…	3048759	Asia	China
Schapira, A.;Almeida, F. L. T.;Averkiev, L.;Omawale;Schwalbach, J. F.;Suleimanov, G.	1988	The Plasmodium falciparum chloroquine in vivo test: extended follow-up is more important than parasite counting	Transactions of the Royal Society of Tropical Medicine and Hygiene	82	1	39-43	349 in vivo tests of the susceptibility of Plasmodium falciparum to chloroquine, 25 mg/kg, were analysed. In some surveys, standard in vitro tests were also carried out. The proportions of sensitive and resistant infections in different areas found by the 2 methods were similar, but, within a given area, correlation between the two methods was often poor. Two RI cases and one RII/RIII case were s…	3051548	Africa	Mozambique
Lemnge, M. M.;Inambao, A. W.	1988	In vivo and in vitro sensitivity of Plasmodium falciparum to chloroquine at Lubwe and Kalene in Zambia: use of amodiaquine as an alternative antimalarial drug	Transactions of the Royal Society of Tropical Medicine and Hygiene	82	2	194-6	The response of Plasmodium falciparum to chloroquine in Zambia was determined by the in vivo and in vitro microtechniques. A total dose of 25mg chloroquine base/kg body weight (over 3 d) was administered to 60 children at Lubwe and 42 at Kalene. The in vivo test was successfully completed on 55 cases at Lubwe and 39 at Kalene, chloroquine resistance being detected in 43.6% and 10.3% of the cases …	3055450	Africa	Zambia
Watt, G.;Long, G. W.;Padre, L. P.;Alban, P.;Sangalang, R.;Ranoa, C. P.	1988	Chloroquine and quinine: a randomized, double-blind comparison of efficacy and side effects in the treatment of Plasmodium falciparum malaria in the Philippines	Transactions of the Royal Society of Tropical Medicine and Hygiene	82	2	205-8	Chloroquine (25 mg/kg over 3 d) was compared to quinine (10 mg/kg 3 times daily for 5 d) in 20 adult Filipino males with uncomplicated Plasmodium falciparum malaria in a double-blind, randomized trial. Asexual parasitaemia was cleared in all patients, with no statistically significant difference (P = 0.13) in the rate of clearance between the chloroquine-treated patients (76.1 +/- 29.3 h) and tho…	3055454	Asia	Philippines
Kremsner, P. G.;Zotter, G. M.;Feldmeier, H.;Graninger, W.;Rocha, R. M.;Wiedermann, G.	1988	A comparative trial of three regimens for treating uncomplicated falciparum malaria in Acre, Brazil	The Journal of infectious diseases	158	6	1368-71		3058821	S.America	Brazil
Thet, N.;Hla, W.;Yin, Y. N.	1988	Falciparum malaria and pregnancy: relationship and treatment response	The Southeast Asian journal of tropical medicine and public health	19	2	253-8	Fifty-two patients with falciparum malaria during pregnancy were studied in Taunggyi, Shan States, Burma, during the period of April 1985 through December 1986. Severely ill cases were all treated with quinine, but uncomplicated cases were randomised to receive either quinine or amodiaquine. Fifty-one age-matched non-pregnant female patients were also randomised to receive either quinine or amodi…	3067374	Asia	Myanmar
Salako, L. A.;Sowunmi, A.;Laoye, O. J.	1988	Evaluation of the sensitivity in vivo and in vitro of Plasmodium falciparum malaria to quinine in an area of full sensitivity to chloroquine	Transactions of the Royal Society of Tropical Medicine and Hygiene	82	3	366-8	The sensitivity of Plasmodium falciparum to quinine in Nigeria was examined in vivo and in vitro prior to the re-introduction of the drug into malaria therapy in that country in the face of spreading chloroquine resistance in Africa. The parasites showed full sensitivity in vivo to quinine, with a mean parasite clearance time of 2.4 d and a mean fever clearance time of 1.4 d. Using the in vitro m…	3068846	Africa	Nigeria
Watkins, W. M.;Brandling-Bennett, A. D.;Nevill, C. G.;Carter, J. Y.;Boriga, D. A.;Howells, R. E.;Koech, D. K.	1988	Chlorproguanil/dapsone for the treatment of non-severe Plasmodium falciparum malaria in Kenya: a pilot study	Transactions of the Royal Society of Tropical Medicine and Hygiene	82	3	398-403	Chlorocycloguanil, the active metabolite of chlorproguanil, was synergistic in vitro with dapsone against 2 culture-adapted Plasmodium falciparum isolates from Kenya; maximal synergy occurred at lower concentrations that it did with pyrimethamine and sulfadoxine. 48 children with asymptomatic P. falciparum infections were treated with chlorproguanil (at a target dose of 1.2 mg/kg) and dapsone (ta…	3068855	Africa	Kenya
Klever, H. J.;Witte, A. M.;Brabin, B. J.;Eggelte, T.;van, d. K. H. J.;Alpers, M. P.	1988	In-vivo susceptibility of Plasmodium falciparum to cholorquine in pregnant and non-pregnant women and in-vitro response of P. falciparum to chloroquine and mefloquine in Madang Province, Papua New Guinea	Acta Leidensia	57	1	29-38		3072818	Asia	Papua New Guinea
Tin, S.;Pe, T. M.;Ye, H.;Win, M.;Lin, S.	1988	The effect of mefloquine-artemether compared with quinine on patients with complicated falciparum malaria	Transactions of the Royal Society of Tropical Medicine and Hygiene	82	5	665-6	30 pairs of patients with complicated Plasmodium falciparum malaria (with anaemia, hyperpyrexia, jaundice or more than 5% of erythrocytes parasitized) were studied. Patients with cerebral signs and symptoms were excluded. One group of patients was treated with oral mefloquine (750 mg) and artemether (600 mg by injection, 200 mg initially and 100 mg every 12 h). The second group of patients was tr…	3075350	Asia	Myanmar
Salako, L. A.;Aderounmu, A. F.;Laoye, J. O.;Makinde, J. M.;Adio, R. A.	1988	Sensitivity of Plasmodium falciparum to mefloquine-sulphadoxine-pyrimethamine (Fansimef) in vivo and to mefloquine alone in vitro in Nigeria	Annals of tropical medicine and parasitology	82	4	325-30	In Nigeria chloroquine remains the drug of choice for the treatment of falciparum malaria, since chloroquine resistance is not yet a problem. Nevertheless, in view of the rapid spread of multi-resistant Plasmodium falciparum in Africa it is desirable to test alternative drugs for efficacy and safety. To this end, we undertook a comparative controlled trial of the new triple combination, mefloquin…	3075441	Africa	Nigeria
Huang, Z. S.;Shao, B. R.;Meng, F.;Zeng, L. H.;Ye, X. Y.;Huang, J.;Shi, X. H.;Guo, R. N.;Li, X.;Xing, Q. F.;et al.	1988	Effects of combined dose of pyronaridine/sulfadoxine/pyrimethamine on falciparum malaria	Chinese journal of parasitology & parasitic diseases	6	4	285-8		3075524	Asia	China
Pang, X. J.;Liu, Q. J.;Chen, Q. Y.;Cai, X. Z.;Lin, K. H.;Ou, F. Z.;Liu, Y. P.;Fu, S. G.;Liu, X. M.;Liu, H. H.;et al.	1988	Efficacy of combined use of pyronaridine, sulfadoxine and pyrimethamine in the treatment of falciparum malaria on Hainan Island	Chinese journal of parasitology & parasitic diseases	6	4	289-91		3075525	Asia	China
Huang, Q. L.;Quyang, W. C.;Zhou, J. X.;Wu, Z.;Zhang, K. Y.;Huang, J. K.;Pan, X. J.;Cai, X. Z.;Fu, S. G.;Huang, X. F.;et al.	1988	Efficacy of amodiaquine, Fansidar and their combination in the treatment of chloroquine-resistant falciparum malaria	Chinese journal of parasitology & parasitic diseases	6	4	292-5		3075526	Asia	China
Guo, X. B.;Arnold, K.;Fu, L. C.;Chen, P. Q.;Li, G. Q.	1988	Double-blind dose finding study of mefloquine-sulfadoxine-pyrimethamine in children with acute falciparum malaria	Transactions of the Royal Society of Tropical Medicine and Hygiene	82	4	538-40	Three different doses of a combination of mefloquine-sulfadoxine-pyrimethamine (MSP), given double-blind as a single dose to 60 children, were evaluated for efficacy and tolerance. The children, 42 boys and 18 girls aged between 5 and 15 years, received a mefloquine dose equivalent to 1, 1.5, or 2 standard MSP (Fansimef) tablets. Radical cure was obtained in all patients with only mild to moderat…	3076709	Asia	China
Barkakaty, B. N.;Sharma, G. K.;Chakravorty, N. K.	1988	Studies on efficacy of treatment with sulfamethoxazole + trimethoprim and sulfalene + pyrimethamine combinations in Plasmodium falciparum malaria of known and unknown resistant status	The Journal of communicable diseases	20	3	165-74		3076890	NA	NA
Asthana, O. P.;Tangri, A. N.;Nityanand, S.	1988	Clinical trial of fansimef in Indian patients of P. falciparum malaria	Indian journal of malariology	25	2	89-96		3077373	Asia	India
Sexton, J. D.;Deloron, P.;Bugilimfura, L.;Ntilivamunda, A.;Neill, M.	1988	Parasitologic and clinical efficacy of 25 and 50 mg/kg of chloroquine for treatment of Plasmodium falciparum malaria in Rwandan children	The American journal of tropical medicine and hygiene	38	2	237-43	The standard chloroquine treatment for Plasmodium falciparum malaria is 25 mg (base)/kg (C25) given over 3 days. In Rwanda, 50 mg/kg (C50) administered over 6 days has been recommended by the Faculty of Medicine, Ministry of Health. The present study compared clinical and parasitological efficacy and side effects of C25 and C50 in children less than or equal to 5 years of age. In vitro studies wi…	3281488	Africa	Rwanda
Deloron, P.;Sexton, J. D.;Bugilimfura, L.;Sezibera, C.	1988	Amodiaquine and sulfadoxine-pyrimethamine as treatment for chloroquine-resistant Plasmodium falciparum in Rwanda	The American journal of tropical medicine and hygiene	38	2	244-8	The efficacy of amodiaquine and sulfadoxine-pyrimethamine combination as a second-line therapy for chloroquine-resistant Plasmodium falciparum infections was investigated in Rwanda in September 1986. Children less than or equal to 5 years old presenting with a P. falciparum parasitemia 14 days after treatment with chloroquine were administered either amodiaquine (25 mg/kg over 3 days, 64 patients…	3281489	Africa	Rwanda
Rana, A. K.;Sharma, T. D.;Prabhakar, H.	1988	Drug resistance in Plasmodium falciparum malaria--a clinical study	Indian journal of medical sciences	42	1	1-3		3286494		India
Wang, H. F.;Shi, W. Z.;Feng, T. G.;Zhang, S. F.;Li, P. S.;Ganjun;Li, G. Q.;Guo, X. B.	1988	Clinical study on the treatment of malaria with artemether and artesunate	Chinese journal of parasitology & parasitic diseases	6	1	26-28		3289785	Asia	China
Schapira, A.;Schwalbach, J. F.	1988	Evaluation of four therapeutic regimens for falciparum malaria in Mozambique, 1986	Bulletin of the World Health Organization	66	2	219-26	A randomized study on the effect of the following four treatment regimens on Plasmodium falciparum parasitaemia was carried out on 200 asymptomatic schoolchildren in Maputo, Mozambique: chloroquine (25 mg/kg body weight), amodiaquine (25 mg/kg), sulfadoxine-pyrimethamine (25 mg/kg and 1.25 mg/kg), or amodiaquine (25 mg/kg) + sulfadoxine-pyrimethamine (25 mg/kg and 1.25 mg/kg) administered on the …	3293827	Africa	Mozambique
Boudreau, E. F.;Pang, L. W.;Dixon, K. E.;Webster, H. K.;Pavanand, K.;Tosingha, L.;Somutsakorn, P.;Canfield, C. J.	1988	Malaria: treatment efficacy of halofantrine (WR 171,669) in initial field trials in Thailand	Bulletin of the World Health Organization	66	2	227-35	Halofantrine (WR 171,669) hydrochloride was administered orally to 82 patients infected with Plasmodium falciparum malaria on the Thai-Kampuchean border between June 1982 and December 1983 in a randomized double-blind treatment trial which compared the efficacy of halofantrine with that of mefloquine. Halofantrine was curative with oral treatment on a single day in 65% of patients (13/20) who rec…	3293828	Asia	Thailand
Da Silva, A. R.;Silva Cde, M.;Branco Mdos, R.;Branco Filho, J. R.	1989	[Results of the use of a therapeutic protocol for Plasmodium vivax for 5 days in 3 municipalities of the Sao Luis Island, State of Maranhao, Brazil]	Revista da Sociedade Brasileira de Medicina Tropical	22	3	131-6	A uniform therapeutic schedule of Chloroquine 1500mg (three days) and Primaquine 75mg (adult 15mg x 5 days) was used in 1232 patients suffering from malaria due to Plasmodium vivax occurring in Island of São Luis Maranhão State in the period between January of 1984 and December 1985. Of the cases, 499 (40.5%) concluded treatment, and of these 448 were cured. Fifty one patients who relapsed respon…	2486524	S.America	Brazil
Julvez, J.;Galtier, J.	1989	In vivo study of chloroquine resistance of Plasmodium falciparum malaria in Mayotte	Medecine tropicale : revue du Corps de sante colonial	49	1	63-5	According to the existence of Plasmodium falciparum chloroquine-resisting cases in Madagascar and, someone, in the Comoro Archipelago, a study using in vivo W.H.O. test was conducted in Mayotte Island. Between the end of 1985 and 1987, despite the great difficulties for ambulatory blood collection in a rural population, 24% of malaria cases had been followed up during 28 days, using a dose of 25 …	2657314	Africa	Mayotte
Mbudi, P. K.;Pela, N. N.;Kalonji, M. W.;Disu, M. M.	1989	Comparative efficacy of alternative treatments in Plasmodium falciparum infections in Zaire	Annales de la Societe belge de medecine tropicale	69	1	25-33	The in vivo sensitivity of Plasmodium falciparum for chloroquine, quinine and pyrimethamine-sulfadoxine has been evaluated in 3 of 14 sentinel antimalarial drugs sensitivity surveillance centres between October 1986 and July 1987. Children of less than five years old were treated with chloroquine at 25 mg/kg dose administered during 3 days, or with 140 mg/kg quinine base administered in a daily d…	2658877	Africa	Democratic Republic of Congo
Arias, A. E.;Corredor, A.	1989	Low response of Colombian strains of Plasmodium vivax to classical antimalarial therapy	Tropical medicine and parasitology	40	1	21-23	This report describes 11 cases of Plasmodium vivax infection of Colombian origin that relapsed 49-166 days following treatment with chloroquine or amodiquine (1.5 g in 3 days) plus primaquine (15 mg daily for 14 days) a regimen widely used to effect radical cure of infections with this parasite. Relapses occurred under conditions that precluded reinfection. The fact that most of the relapses occu…	2662351	S.America	Colombia
Macaigne, F.;Combe, A.;Vincendeau, P.;Eboumbou, J.;Garnier, T.;Michel, R.;Ripert, C.	1989	In vivo sensitivity of Plasmodium falciparum to amodiaquine in the town of Edea (Cameroon)	Bulletin de la Societe de pathologie exotique et de ses filiales	82	2	208-16	In the town of Edea, where falciparum malaria is hyperendemic, an in vivo study of amodiaquine sensitivity of the local strain of the parasite is performed in school children 6 to 12 years of age: 184 children with parasites in their blood and no chloroquine in their urine are given amodiaquine orally. In 96 children having taken 35 mg per kg body weight of amodiaquine base, none is any longer ha…	2663213	Africa	Cameroon
Hengy, C.;Garrigue, G.;Abissegue, B.;Ghogomu, N. A.;Gazin, P.;Gelas, H.;Kouka-Bemba, D.;Le, B. J.;Jambou, R.	1989	Surveillance of Plasmodium falciparum drug sensitivity in Yaounde and its surroundings (Cameroon). In vivo and in vitro study	Bulletin de la Societe de pathologie exotique et de ses filiales	82	2	217-23	Among 172 strains collected in Yaounde 60% are chloroquine-resistant, 37% are amodiaquine-resistant, instead of quinine and mefloquine which are completely efficient. Among 30 strains collected at a rural health center (where self treatment decreases), 27% are chloroquine-resistant. New therapeutic schemes for first and second line treatment in endemic areas must be evaluated.	2663214	Africa	Cameroon
Schuurkamp, G. J.;Kereu, R. K.	1989	Resistance of Plasmodium falciparum to chemotherapy with 4-aminoquinolines in the Ok Tedi area of Papua New Guinea	Papua and New Guinea medical journal	32	1	33-44	In the North Fly region of the Western Province of Papua New Guinea 491 cases of Plasmodium falciparum infection were monitored in vivo for sensitivity to chloroquine and amodiaquine over a 2-year period; 41% resistance was detected. The RI type accounted for 74% of the resistant strains detected; 43% of these recrudesced on day 28 or shortly thereafter. 22% of resistant strains were RII type and…	2665376	Asia	Papua New Guinea
Raccurt, C. P.;Ribou, G.;Lambert, M. T.;Bouloumie, J.;Macaigne, F.;Ripert, C.	1989	Halofantrine in the treatment of malaria. Clinical trial in a semi-rural zone of Cameroon	Bulletin de la Societe de pathologie exotique et de ses filiales	82	3	368-72	Twelve children, 2 to 15 years of age, with falciparum malaria (parasitaemia 4,500 to 170,000/mm3) have taken 24 mg/kg body weight of halofantrine hydrochloride (Halfan) per os in three divided doses given within 12 hours. The symptomatology improved after 24 to 48 hours, with no more fever 5 to 90 hours after treatment and with a decrease of splenomegaly in 80% of the cases. The parasitic cleara…	2670289	Africa	Cameroon
Huang, Z. S.;Feng, Z.;Meng, F.;Zeng, L. H.;Lin, X.;Zheng, Y.;Xing, Q. F.;Guo, R. N.	1989	Therapeutic effect of pyronaridine in plain tablets and enteric-coated tablets in falciparum malaria patients	Chinese Journal of Parasitology & Parasitic Diseases	7	1	19-21	A new oral dosage regimen and formulation of pyronaridine basing on the pharmacokinetic studies and a theoretical dosage regimen reported previously, was clinically evaluated for its therapeutic and undesirable effects on falciparum malaria patients in west Hainan Province, where chloroquine-resistant falciparum malaria was prevalent. 32 cases were treated with pyronaridine by the new dosage regi…	2670309	Asia	China
Sinha, S.;Dua, V. K.;Sharma, V. P.	1989	Efficacy of 5 day radical treatment of primaquine in Plasmodium vivax cases at the BHEL industrial complex, Hardwar (U.P.)	Indian journal of malariology	26	2	83-6	Studies on 725 P. vivax infected patients at the Bharat Heavy Electricals Ltd. produced 6.9 per cent relapse rate after administration of radical treatment of primaquine / 15 mg daily for 5 days as followed under the National Malaria Eradication Programme. Maximum relapses were recorded in a female patient in spite of repeated radical treatment.	2676618	Asia	India
Richard-Lenoble, D.;Kombila, M.;Martz, M.;Lefevre, B.;Chandenier, J.;Gay, F.;Billiault, X.;Therizol-Ferly, M.	1989	Development of chloroquine resistance in Plasmodium falciparum in Gabon between 1984 and 1987-88 (in vivo evaluation in a school environment)	Annales de la Societe belge de medecine tropicale	69	2	113-9	Unknown in 1980, suspected in 1983 and scarcely present in 1984-85, Plasmodium falciparum resistance to chloroquine as studied in vivo in schoolchildren in Gabon, has strongly developed in 4 years time. In 1987-88, administration of 25 mg/kg of chloroquine leaves one strain out of four with a parasitic load greater than 10/1.000 red blood cells examined by thick drop technique. The present, unfor…	2679451	Africa	Gabon
Blanchy, S.;Benthein, F.	1989	In vivo chemosensitivity of Plasmodium falciparum in the Islamic Federal Republic of the Comoros	Bulletin de la Societe de pathologie exotique et de ses filiales	82	4	493-502	The RFI des Comores is classified by WHO as an area where P. falciparum resistance to chloroquine is rare or low. After reviewing the existing data, the authors are giving the results of an in vivo research in 1988-1989. 1.35 of the tests with 25 mg/kg were positive the 7th day, 3.38% of 207 tests with 20 mg/kg, 10.77% of 232 tests with 10 mg/kg, 21.56% of 51 tests on 5 mg/kg.	2680133	Africa	Comoros
Chen, L.;Dai, Z. R.;Qian, Y. L.;Ma, Z. M.;Guo, F. C.;Liao, Z. H.;Fu, D. D.;Ma, D. Q.;Pang, X. J.	1989	Observation on the efficacy of combined use of some new antimalarials for the treatment of falciparum malaria in Hainan Province	Chinese Journal of Parasitology & Parasitic Diseases	7	2	81-4	Field trials were carried out to assess the therapeutic effects including the combined use of piperaquine (PQ) with nitroquine (NQ) and pyronaridine (PYR) with NQ against falciparum malaria in regions of Hainan Province with chloroquine-resistance in 3 successive autumns from 1985 to 1987. In an evaluation of PQ 750 mg with NQ 25 mg therapy in 33 falciparum malaria patients, the average fever sub…	2680154	Asia	China
Lan, C. X.;Lin, X.;Huang, Z. S.;Chen, Y. S.;Guo, R. N.	1989	In vivo sensitivity of Plasmodium falciparum to piperaquine phosphate assayed in Linshui and Baisha counties, Hainan Province	Chinese Journal of Parasitology & Parasitic Diseases	7	3	163-5	Fifty-three cases of falciparum malaria in Linshui County, Baisha County and Sanya Municipality were treated with piperaquine phosphate at a total dose of 1.5g base over 3 days in July to December, 1986. The mean defervescence time was 36 +/- 20.7h; the mean asexual parasite clearance time was 69.7 +/- 20.9h. At 14-28d follow-up recrudescence was observed with asexual parasitemia in 7 of the 47 c…	2686856	Asia	China
Guo, X. B.;Fu, L. C.	1989	Comparative study of artemisinin suppositories and piperaquine phosphate in the treatment of falciparum malaria	Chinese journal of modern developments in traditional medicine	9	8	475-7, 453	Artemisinin, developed by Chinese scientists, is a new type of anti-malarial drug with quick effect and low toxicity. Since its solubility in water or oil is very low, it cannot be made into a clear injection to be given intramuscularly or intravenously for emergency use. The artemisinin suppositories used in the study was provided by the institute of Chinese Materia Medica in 1982. Phase I and P…	2688937	Asia	China
Bunnag, D.;Harinasuta, T.;Looareesuwan, S.;Chittamas, S.;Pannavut, W.;Berthe, J.;Mondesir, J. M.	1989	A combination of quinine, quinidine and cinchonine (LA 40221) in the treatment of chloroquine resistant falciparum malaria in Thailand: two double-blind trials	Transactions of the Royal Society of Tropical Medicine and Hygiene	83	1	66	-	2690417	Asia	Thailand
Daniel, H. I.;Molta, N. B.	1989	Efficacy of chloroquine in the treatment of malaria in children under five years in Baissa (Gongola State, Nigeria)	Annals of tropical medicine and parasitology	83	4	331-8	The Nigerian Federal Ministry of Health in 1987 instituted a nationwide programme to gather data on the efficacy of chloroquine in treating malaria in children as a basis for the development of a national malaria therapy policy. The programme is part of a comprehensive Combating Childhood Communicable Diseases (CCCD) programme. A simplified WHO in vivo method, involving follow-up observations on …	2690763	Africa	Nigeria
Kremsner, P. G.;Zotter, G. M.;Graninger, W.;Rocha, R. M.;Bienzle, U.;Feldmeier, H.	1989	Clindamycin is effective against Plasmodium falciparum but not against P. vivax in mixed infections	Transactions of the Royal Society of Tropical Medicine and Hygiene	83	3	332-3		2694469
Deloron, P.;Lepers, J. P.;Verdier, F.;Chougnet, C.;Remanamirija, J. A.;Andriamangatiana-Rason, M. D.;Coulanges, P.;Jaureguiberry, G.	1989	Efficacy of a 3-day oral regimen of a quinine-quinidine-cinchonine association (Quinimax) for treatment of falciparum malaria in Madagascar	Transactions of the Royal Society of Tropical Medicine and Hygiene	83	6	751-4	In the search for an effective, safe and field-adapted alternative to chloroquine for therapy of chloroquine-resistant Plasmodium falciparum infections in Africa, a 3-d oral regimen of Quinimax (an association of quinine, quinidine and cinchonine) was evaluated in 35 individuals with P. falciparum in Madagascar, an area with chloroquine resistance. 63% of the parasite strains isolated were resist…	2694508	Africa	Madagascar
Wang, T.Y.	1989	Follow-up observation on the therapeutic effects and remote reactions of artemisinin (Qinghaosu) and artemether in treating malaria in pregnant woman	Journal of Traditional Chinese Medicine	9	1	28-30		2761279	Asia	China
Salazar, N. P.;Saniel, M. C.;Estoque, M. H.;Talao, F. A.;Bustos, D. G.;Palogan, L. P.;Gabriel, A. I.	1990	Oral clindamycin in the treatment of acute uncomplicated falciparum malaria	The Southeast Asian journal of tropical medicine and public health	21	3	397-403	Clinical trials on oral clindamycin as an antimalarial in hospitalized patients and residents of endemic communities were conducted in the Philippines between May 1984 and December 1985. Seven and 9 qualified subjects in hospital were treated with 300 mg (regimen A) and 600 mg (regimen B) respectively, twice daily for 5 days. Eighteen patients seen at a rural health unit were given the lower dosa…	2075481	Asia	Philippines
Thimasarn, K.;Pinichpongse, S.;Malikul, S.;Rooney, W.;Tansophalaks, S.	1990	Phase III double-blind comparative study of Fansimef and Lariam for the curative treatment of Plasmodium falciparum infections in Thailand	The Southeast Asian journal of tropical medicine and public health	21	3	404-11	A double-blind comparative study of Fanismef-mefloquine/sulfadoxine/pyrimethamine (MSP) and Lariam-mefloquine (MEF) for the treatment of falciparum malaria, was carried out at malaria clinics in Kanchanaburi, in western Thailand, in the years 1987 and 1988. The cure rates obtained were 96% for the MSP group and 93% for the MEF and there was no significant difference. Vomiting and diarrhea were co…	2075482	Asia	Thailand
Petersen, E.;Hogh, B.;Hanson, A. P.;Bjorkman, A.;Flacks, H.	1990	In vitro and in vivo susceptibility of Plasmodium falciparum isolates from Liberia to pyrimethamine, cycloguanil and chlorcycloguanil	Annals of tropical medicine and parasitology	84	6	563-71	In vivo susceptibility of Plasmodium falciparum to chlorproguanil and in vitro susceptibility to pyrimethamine, cycloguanil and chlorcycloguanil were studied in 38 children from two Liberian villages. Children in one village (Lagbala) had received monthly chemosuppression with chlorproguanil from 1976-1985, and children in the other village (JDF) had received fortnightly chlorproguanil from 1981-…	2076034	Africa	Liberia
Andriamangatiana-Rason, M. D.;Lepers, J. P.;Raharimalala, A. L.;Verdier, F.;Coulanges, P.	1990	Aspects of in vivo chemosensitivity of Plasmodium falciparum to chloroquine in a village of the Highland Plateaux of Madagascar in 1989	Archives de l'Institut Pasteur de Madagascar	57	1	93-104		2078091	Africa	Madagascar
Arnold, K.;Tran, T. H.;Nguyen, T. C.;Nguyen, H. P.;Pham, P.	1990	A randomized comparative study of artemisinine (qinghaosu) suppositories and oral quinine in acute falciparum malaria	Transactions of the Royal Society of Tropical Medicine and Hygiene	84	4	499-502	In adult patients with acute falciparum malaria in Ho Chi Minh City, Vietnam, a more rapid reduction in parasite count (50% clearance in 11.3 h) and complete clearance (41.8 h) was obtained in 32 adult patients randomly assigned to received artemisinine suppositories than was obtained with 30 patients receiving oral quinine (20.8 h and 68.1 h). There were higher degrees of resistance (RII, 3 case…	2091337	Asia	Vietnam
Lege-Oguntoye, L.;Adagu, S. I.;Werblinska, B.;Ogala, W. N.;Slotboom, A. B.	1990	Resistance of Plasmodium falciparum to sulfadoxine-pyrimethamine combination in semi-immune children in Zaria, northern Nigeria	Transactions of the Royal Society of Tropical Medicine and Hygiene	84	4	505-6	The World Health Organization (WHO) extended field test was employed to assess the in vivo sensitivity of Plasmodium falciparum to sulfadoxine-pyrimethamine combination in 44 children in Zaria urban area. 36 children (82%) were fully sensitive to the drug and 8 (18%) were resistant at the RI level. 8 parasite isolates were obtained from the children and successfully cultured in vitro using the WH…	2091339	Africa	Nigeria
Arora, U.;Sharma, R. S.;Singh, G.;Dasgupta, R. K.;Narasimham, M. V.	1990	In vivo test for sensitivity of Plasmodium falciparum to chloroquine in Faridabad complex of Haryana (India)	Indian journal of malariology	27	4	205-8	A study was conducted to know the chloroquine sensitivity of Plasmodium falciparum in Faridabad complex of Haryana state where indigenous resistant cases of P. falciparum to chloroquine have been detected for the first time in the district. Out of 13 cases tested, 3 cases showed resistance at RIII level, 5 cases at RII level and 5 cases at RI level.	2093003	Asia	India
Pandya, A. P.;Barkakaty, B. N.;Narasimham, M. V.;Mahapatra, P. K.	1990	Plasmodium falciparum--chloroquine in vivo test in northeast India: reclassification and extended follow-up till day 14	Indian journal of malariology	27	4	223-9	In vivo test for the susceptibility of Plasmodium falciparum to chloroquine was carried out in 390 patients. Parasite density was analysed by calculating the mean of each day's parasite count and the value was expressed per microliters of blood. Majority of sensitive and resistant infections attained minimal values on day 4. Further more, this value provides a clear-cut, statistically significant…	2093006	Asia	India
Sowunmi, A.;Salako, L. A.;Walker, O.;Ogundahunsi, O. A.	1990	Clinical efficacy of mefloquine in children suffering from chloroquine-resistant Plasmodium falciparum malaria in Nigeria	Transactions of the Royal Society of Tropical Medicine and Hygiene	84	6	761-4	One hundred and thirteen children with symptomatic uncomplicated falciparum malaria were treated with either chloroquine 25 mg/kg body weight over 3 d (51 subjects) or mefloquine 25 mg/kg body weight single dose (62 subjects). The cure rate in the chloroquine group was 65% and in the mefloquine group 100%. 14 patients with chloroquine-resistant falciparum malaria (7 RI, 6 RII and one RIII) were s…	2096499	Africa	Nigeria
Barkakaty, B. N.;Chakravorty, N. K.;Narasimham, M. V.	1990	Efficacy of sulfalene and pyrimethamine combination drugs alone and with quinine in treatment of P. falciparum cases in chloroquine resistant areas of north east India	The Journal of communicable diseases	22	3	178-84	Studies were carried out in some areas of Assam, Nagaland, West Bengal and Mizoram where chloroquine resistant strains of Plasmodium falciparum were present during 1983 and 1984, to see the efficacy of treatment of P. falciparum cases with SLP alone or with quinine sulphate. The findings have indicated that SLP in the dosage of sulfalene (1000 mg) + Pyrimethamine (50 mg) is suitable for treatment…	2098422	Asia	India
Harinasuta, T.;Bunnag, D.;Lasserre, R.	1990	Quinine resistant falciparum malaria treated with mefloquine	The Southeast Asian journal of tropical medicine and public health	21	4	552-7	Twenty eight adult male patients with acute uncomplicated falciparum malaria which showed RI or RII responses to quinine sulfate at the dosage of 600 mg 8 hourly for 7, 10 or 14 days were treated with a single dose of mefloquine (Lariam); 25 patients received 1000 mg, 2 received 750 mg and 1 received 500 mg. The initial response was good; there was no RII or RIII response. Three patients were los…	2098915	Asia	Thailand
Elueze, E. I.;Osisanya, J. O.;Edafiogho, I. O.	1990	Sensitivity to chloroquine in vivo and in vitro of Plasmodium falciparum in Sokoto, Nigeria	Transactions of the Royal Society of Tropical Medicine and Hygiene	84	1	45		2189245	Africa	Nigeria
Trinh, K. A.;Nguyen, V. K.;Arnold, K.;Vo, V. C.;Nguyen, N. B.;Kim, T.;Ladinsky, J.	1990	Double-blind studies with mefloquine alone and in combination with sulfadoxine-pyrimethamine in 120 adults and 120 children with falciparum malaria in Vietnam	Transactions of the Royal Society of Tropical Medicine and Hygiene	84	1	50-3	In 120 adult Vietnamese patients with uncomplicated falciparum malaria the efficacy of, and tolerance to, mefloquine (M) vs the combination of mefloquine + sulfadoxine + pyrimethamine (MSP) was studied in a double-blind, randomized comparative trial with chloroquine. Also, a double-blind dose finding study of MSP was performed in 120 Vietnamese children with uncomplicated falciparum malaria. In t…	2189246	Asia	Vietnam
Ekanem, O. J.;Weisfeld, J. S.;Salako, L. A.;Nahlen, B. L.;Ezedinachi, E. N.;Walker, O.;Breman, J. G.;Laoye, O. J.;Hedberg, K.	1990	Sensitivity of Plasmodium falciparum to chloroquine and sulfadoxine/pyrimethamine in Nigerian children	Bulletin of the World Health Organization	68	1	45-52	The in vivo sensitivity of Plasmodium falciparum to chloroquine and sulfadoxine/pyrimethamine was evaluated in children under 5 years of age in two areas of southern Nigeria in 1987. A modification of the WHO Standard Field and Extended Tests (in vivo) was used, with follow-up on days, 2, 3, 7, and 14 after treatment with 25 mg chloroquine per kg body weight given over 3 days, or with standard do…	2189585	Africa	Nigeria
Slutsker, L. M.;Khoromana, C. O.;Payne, D.;Allen, C. R.;Wirima, J. J.;Heymann, D. L.;Patchen, L.;Steketee, R. W.	1990	Mefloquine therapy for Plasmodium falciparum malaria in children under 5 years of age in Malawi: in vivo/in vitro efficacy and correlation of drug concentration with parasitological outcome	Bulletin of the World Health Organization	68	1	53-9	The in vivo and in vitro response of Plasmodium falciparum to a single oral dose of mefloquine (25 mg/kg body weight (M25) or 15 mg/kg (M15] was studied in children under 5 years of age in Malawi. Of the children who received mefloquine, 35% vomited at least once, and 10% did not tolerate the drug because of vomiting. The therapy failure rates for the M25 group on day 7, 14, and 28 were 15%, 18%,…	2189586	Africa	Malawi
Raccurt, C. P.;Arouko, H.;Djossou, F.;Macaigne, F.;Massougbodji, A.;Zohoun, T.;Sadeler, B. C.;Ripert, C.	1990	In vivo amodiaquine sensitivity of Plasmodium falciparum in the town of Cotonou and in the vicinity (Benin)	Medecine tropicale : revue du Corps de sante colonial	50	1	21-6	In the coastal area of Benin, where chloroquine resistant Plasmodium falciparum strains occur, 152 children in the Guezo military camp (Cotonou) and 448 children in a fishermen village (Ekpe), on the southern bank of lake Nokoue, are examined. The falciparum malaria infected children (29 and 135 respectively) have received 35 mg/kg body weight of amodiaquine (Flavoquine) divided in three consecut…	2195282	Africa	Benin
Gazin, P.;Louis, J. P.;Mulder, L.;Eberle, F.;Jambou, R.;Moyroud;Hengy, C.	1990	Evaluation of Plasmodium falciparum susceptibility to chloroquine and amodiaquine using a simplified, in vivo, 7-day test in southern Cameroon	Medecine tropicale : revue du Corps de sante colonial	50	1	27-31	Plasmodium falciparum susceptibility to chloroquine and amodiaquine at a posology of 25 mg/kg per os in 3 days was evaluated in the pupils of 6 primary schools of South-West Cameroon during the first semester 1989. Parasitic index was 75%. Plasmodium falciparum was present in 96% of the infections 24% of the 357 children treated with chloroquine were carriers of trophozoites at D3 and 17% at D7. …	2195283	Africa	Cameroon
Singh, N.;Mishra, A. K.;Sharma, V. P.	1990	Radical treatment of vivax malaria in Madhya Pradesh, India	Indian journal of malariology	27	1	55-6		2200726	Asia	India
Usanga, E. A.;Ezedinachi, E. N.;Gemade, E. I.;Ikpatt, N. W.;Alaribe, A. A.	1990	Efficacies of chloroquine and pyrimethamine-sulphadoxine in a Nigerian population with chloroquine resistant P. falciparum malaria	East African medical journal	67	5	295-301	A modification of the standard World Health Organisation 7--day in vivo test was used to assess the parasitologic and, to limited extent, the clinical response of children less than 5 years of age to defined oral dosages of chloroquine and pyrimethamine-sulphadoxine during the 14 days following the initiation of treatment. The study took place in Jato-Aka, a rural community in Benue State of Nige…	2202586	Africa	Nigeria
Tanabe, K.;K. Shimada	1990	Clinical evaluation of antimalarial drugs	The Journal of the Japanese Association for Infectious Diseases	64	6	668-73	We have analyzed the clinical data of 189 patients with malaria to establish antimalarial regimens in Japan. The causative parasite species were Plasmodium falciparum in 56 cases (30%), P. vivax in 132 (70%) and P. malariae in 1 (1%). The outcomes f malaria cases are as follows: Cure rats in falciparum and vivax malaria are 86% and 91%, respectively. Two patients died of falciparum malaria and re…	2205671	Asia	Japan
Keuter, M.;van, E. A.;Hoogstrate, M.;Raasveld, M.;van, d. R. M.;Ngwawe, W. A.;Watkins, W. M.;Were, J. B.;Brandling-Bennett, A. D.	1990	Comparison of chloroquine, pyrimethamine and sulfadoxine, and chlorproguanil and dapsone as treatment for falciparum malaria in pregnant and non-pregnant women, Kakamega District, Kenya	BMJ (Clinical research ed.)	301	6750	466-70	OBJECTIVE: To compare treatment and protection against falciparum malaria in pregnant and non-pregnant women with three drug regimens. DESIGN: Prospective intervention study with six weeks' follow up. Patients received one of three drug regimens in order of entry. SETTING: Primary care hospital and secondary girls' school in rural western Kenya. PATIENTS: 158 of 988 pregnant women (89 primigravid…	2207399	Africa	Kenya
Carme, B.;Moudzeo, H.;Mbitsi, A.;Sathounkazi, C.;Ndounga, M.;Brandicourt, O.;Gay, F.;Le, B. J.;Gentilini, M.	1990	Plasmodium falciparum drug resistance in the Congo. Evaluation of surveys carried out from 1985 to 1989	Bulletin de la Societe de pathologie exotique	83	2	228-41	Surveys on drug sensitivity of Plasmodium falciparum carried out between 1985 and 1989 included 7-day in vitro tests and in vivo tests. 485 in vivo tests were carried out in eight surveys conducted in Brazzaville and in several inland regions. The subjects were congolese children aged between 3 months and 15 years old. They were recruited in hospital, mother-child clinics or at school. The drugs …	2208453	Africa	Democratic Republic of Congo
Wirima, J. J.;Khormana, C. O.;Macheso, A. F.;Heymann, D. L.;Campbell, C. C.	1990	In vivo efficacy of quinine treatment for Plasmodium falciparum malaria in Malawian children	Annals of tropical medicine and parasitology	84	3	223-7	Twenty-five Malwaian children with Plasmodium falciparum infection were studied for response to quinine in an eight-hourly dosage of 10 mg salt kg-1 body weight. The mean parasite clearance time, defined as the time after initiation of treatment when the first of two consecutive 12-hourly smears was negative for P. falciparum parasites, was 67 hours. The mean fever clearance time, defined as the …	2222024	Africa	Malawi
Shcherbakov, A. M.;Rabinovich, S. A.;Chin, K. A.;Nguyen, V. K.;Chan, V. B.;Dadasheva, N. R.;Sokhanenkova, T. L.;Nguyen, V. T.;Vu, T. T.;Vu, C.;et al.	1990	The efficacy of and tolerance for fansimef in the treatment of tropical malaria in the south of the Socialist Republic of Vietnam	Meditsinskaia parazitologiia i parazitarnye bolezni		4	7-9	The efficacy of and tolerance to fancimef in 49 patients was compared to the efficacy of and tolerance to quinine in combination with fansidar in 33 patients with moderate P. falciparum malaria. A good tolerance to and a high efficacy of fancimef have been shown, which was manifested in rapid fever arrest, disappearance of parasitemia, absence of the disease relapses, which were observed in 2 pat…	2233545	Asia	Vietnam
Shcherbakov, A. M.;Nguyen, T. L.;Chin, K. A.;Chan, K. T.;Rabinovich, S. A.;Nguyen, V. D.;Chan, V. F.;Vu, T. T.;Padelt, H.;et al.	1990	The clinical efficacy of and tolerance for lariam (mefloquine) in tropical malaria in the south of the Socialist Republic of Vietnam	Meditsinskaia parazitologiia i parazitarnye bolezni		5	57-9	The study was performed in the area of distribution of tropical malaria resistant to 4-aminoquinolines (Vietnam) on 30 patients receiving lariam (mefloquine). The results were compared to the standard therapy with quinine and fansidar. They indicate a high efficacy of and a good tolerance to the drug tested. The use of lariam leads to a more rapid (as compared to the standard treatment) eliminati…	2266908	Asia	Vietnam
Salako, L. A.;Adio, R. A.;Sowunmi, A.;Walker, O.	1990	Parenteral sulphadoxine-pyrimethamine (Fansidar): an effective and safe but under-used method of anti-malarial treatment	Transactions of the Royal Society of Tropical Medicine and Hygiene	84	5	641-3	One hundred and eighteen patients with acute falciparum malaria were randomized into treatment with either intramuscular or oral sulfadoxine-pyrimethamine (Fansidar, Roche) and the results were compared with those from 68 patients treated in parallel with chloroquine. Parasitological cure rate was 97% with oral sulfadoxine-pyrimethamine, 95% with the injection, and only 63% with chloroquine. The …	2278060	Africa	Nigeria
Salako, L. A.;Sowunmi, A.;Walker, O.	1990	Evaluation of the clinical efficacy and safety of halofantrine in falciparum malaria in Ibadan, Nigeria	Transactions of the Royal Society of Tropical Medicine and Hygiene	84	5	644-7	Fifty subjects with acute symptomatic uncomplicated falciparum malaria were treated orally with halofantrine hydrochloride 500 mg 6 hourly for 3 doses if their body weight was 40 kg and above, or 8 mg/kg body weight 6 hourly for 3 doses if their weight was below 40 kg. Parasitaemia cleared in all subjects within 72 h. There was recurrence of parasitaemia in 9 subjects after day 14, and retreatmen…	2278061	Africa	Nigeria
Rotigliano, G.;Lamizana, L.;Procacci, P. G.;Kumlien, S.	1990	In vivo sensitivity of Plasmodium falciparum to chloroquine in Burkina Faso	Transactions of the Royal Society of Tropical Medicine and Hygiene	84	5	670-1		2278065	Africa	Burkina Faso
Dinis, D. V.;Schapira, A.	1990	Comparative study of sulfadoxine-pyrimethamine and amodiaquine + sulfadoxine-pyrimethamine for the treatment of malaria caused by chloroquine-resistant Plasmodium falciparum in Maputo, Mozambique	Bulletin de la Societe de pathologie exotique	83	4	521-7	To compare the efficacy and side-effects of two therapeutic regimens for chloroquine-resistant falciparum malaria, a randomized study was carried out in 69 patients in Maputo Central Hospital in 1986-1987. The two treatments were sulfadoxine 25 mg/kg + pyrimethamine 1.25 mg/kg as a single dose (S + P) and amodiaquine 10 + 10 + 5 mg/kg over three days with sulfadoxine + pyrimethamine on the third …	2286005	Africa	Mozambique
Nosten, F.;ter, K. F.;Chongsuphajaisiddhi, T.;Luxemburger, C.;Webster, H. K.;Edstein, M.;Phaipun, L.;Thew, K. L.;White, N. J.	1991	Mefloquine-resistant falciparum malaria on the Thai-Burmese border	Lancet	337	8750	1140-3	Mefloquine is the treatment of choice for uncomplicated multiresistant falciparum malaria, and in combination with sulphadoxine and pyrimethamine (MSP) at a single dose of 15/30/1.5 mg/kg, respectively, has been used in Thailand for the past 6 years. In 1985-86, MSP cured over 98% of 5192 patients with falciparum malaria on the Thai-Burmese border. 4 years later we studied the efficacy of MSP in …	1674024	Asia	Thailand
Umotong, A. B.;Ezedinachi, E. N.;Okerengwo, A. A.;Usanga, E. A.;Udo, J. J.;Williams, A. I.	1991	Correlation between in vivo and in vitro response of chloroquine-resistant Plasmodium falciparum in Calabar, south-eastern Nigeria	Acta tropica	49	2	119-25	Since chloroquine-resistant Plasmodium falciparum (CRPF) has emerged in Nigeria, we monitored the susceptibility of the parasite strain to a standard chloroquine (C25) dose in our Children's Emergency Unit. Chloroquine (CQ) is the drug of choice for malaria chemotherapy in Nigeria. The WHO 7-day in vivo evaluation and Rieckmann's microtitre technique (in vitro test) were used. 33 children of mean…	1680278	Africa	Nigeria
Fadat, G.;Le, B. J.;Hengy, C.;Louis, J. P.;Gimou, M. M.;Verdier, F.	1991	Efficacy of amodiaquine against chloroquine-resistant malaria in Cameroon	Lancet	338	8774	1092		1681402	Africa	Cameroon
Mutabingwa, T. K.;Malle, L. N.;Mtui, S. N.	1991	Chloroquine therapy still useful in the management of malaria during pregnancy in Muheza, Tanzania	Tropical and geographical medicine	43	2011-02-01	131-5	In searching for effective malaria chemosuppressives during pregnancy in Muheza District--Tanzania, pregnant women are randomly given either 300 mg base chloroquine once weekly or 200 mg daily proguanil. Breakthroughs presenting with clinical malaria are treated with 25 mg base chloroquine/kg (25 CQ) over three days. Due to loss of malaria immunity during pregnancy and Muheza moderate levels and …	1750102	Africa	Tanzania
Diallo, S.;Gaye, O.;Bah, I. B.;Trape, J. F.;Konate, L.;Legros, C.;Dieng, T.;Faye, O.	1991	Trial of halofantrine in the treatment of malaria attacks by Plasmodium falciparum in Dakar (Senegal)	Bulletin de la Societe de pathologie exotique	84	3	298-303	Halofantrine has been given to 14 children and 15 adults suffering from an acute attack of P. falciparum malaria and living in Dakar (Senegal) to a total dose of 24 mg/kg/body weight for the first group and 1,500 mg for the second in 3 times at 6-hourly intervals. This treatment has allowed the fever to clear in all cases within 36.3 +/- 19.9 hours and headache to disappear at D3 in 93.1% of case…	1764759	Africa	Senegal
Oloo, A. J.;Adoyo, A.;Kariuki, D.;Boriga, D. A.;Magiri, C.;Were, J. B.;Koech, D. K.	1991	Sensitivity of falciparum malaria to chloroquine and amodiaquine in four districts of western Kenya (1985-1987)	East African medical journal	68	8	606-10	In-vivo and in-vitro studies to determine the sensitivity of Plasmodium falciparum malaria to chloroquine and amodiaquine were conducted in 4 districts of Western Kenya over a 2-year-period. Patients aged 5-60 years, were treated with chloroquine or amodiaquine base 25 mg/kg over 3 days. Recurrence of parasitaemia within 7 days (R1 resistance) or failure to clear parasites (R11 resistance) was ob…	1765012	Africa	Kenya
Ezedinachi, E. N.;Ejezie, G. C.;Usanga, E. A.;Gemade, E. I.;Ikpatt, N. W.;Alaribe, A. A.	1991	New trends in chloroquine efficacy in the treatment of malaria: chloroquine-resistant Plasmodium falciparum in Anambra and Benue States of Nigeria	The Central African journal of medicine	37	6	180-6	Increasing malaria treatment failures with chloroquine (C25) and reports of chloroquine resistant Plasmodium falciparum (CRPF) led to the field survey of two sites (Agbani and Jato-Aka) both in Primary Health Zone A, using WHO--in vivo seven-day test, modified to 14-day follow-up period. Of the 922 children studied, high transmission rates of 40 pc and 59.2 pc were found in Agbani and Jato-Aka re…	1790563	Africa	Nigeria
Irare, S. G.;Lemnge, M. M.;Mhina, J. I.	1991	Falciparum malaria fully cleared by amodiaquine, pyrimethamine-sulfadoxine and pyrimethamine-sulfalene in areas of chloroquine resistance in Dodoma, Tanzania	Tropical and geographical medicine	43	4	352-6	The in vivo response of Plasmodium falciparum to chloroquine, amodiaquine, pyrimethamine-sulfalene (MetakelfinR) and pyrimethamine-sulfadoxine (FansidarR) was assessed in Dodoma in 1988. Asymptomatic schoolchildren with pure P. falciparum infection were given full curative doses of one of the above antimalarials. Daily parasitological follow-ups were made for seven days. Overall successful follow…	1812599	Africa	Tanzania
Bunnag, D.;Viravan, C.;Looareesuwan, S.;Karbwang, J.;Harinasuta, T.	1991	Clinical trial of artesunate and artemether on multidrug resistant falciparum malaria in Thailand. A preliminary report	The Southeast Asian journal of tropical medicine and public health	22	3	380-5	A 5-day course of oral artesunate at total doses of 1200, 600, 650 mg and intramuscular artemether 480 mg proved effective (90-100% cured) in the treatment of multidrug resistant falciparum malaria in Thailand. Shorter courses yielded high recrudescence rates. The fever clearance and parasite clearance times were short. The side effects were mild and transient including occasional abnormal electr…	1818389	Asia	Thailand
Salazar, N. P.;Carlos, C. C.;Bustos, D. G.;Quiambao, B. P.;Saniel, M. C.;Santos, M. N.	1991	Halofantrine in the treatment of acute uncomplicated falciparum malaria in the Philippines	The Southeast Asian journal of tropical medicine and public health	22	3	386-92	In an open clinical trial, thirty patients 14 to 44 years old and with acute uncomplicated falciparum malaria were given halofantrine hydrochloride 500 mg (2 tablets) 6-hourly for 3 doses, a total dose of 1500 mg. All 30 patients were cured, with a mean asexual parasite clearance time of 47.6 hours and mean fever clearance time of 36.6 hours. Post-dosing side-effects occurred in 6 patients consis…	1818390	Asia	Philippines
Prasad, R. N.;Virk, K. J.;Sharma, V. P.	1991	Relapse/reinfection patterns of Plasmodium vivax infection: a four year study	The Southeast Asian journal of tropical medicine and public health	22	4	499-503	In an endemic area relapse and reinfection in Plasmodium vivax cases poses serious problems for the malaria control program. We have studied the relapse/reinfection patterns of P. vivax infection in 26 villages of District Shahjahanpur, a malaria endemic area of UP, India for a period of four years (May, 1986 to October, 1988). All the P. vivax cases were given a complete course of radical treatm…	1820634	Asia	India
Bunnag, D.;Viravan, C.;Looareesuwan, S.;Karbwang, J.;Harinasuta, T.	1991	Double blind randomised clinical trial of two different regimens of oral artesunate in falciparum malaria	The Southeast Asian journal of tropical medicine and public health	22	4	534-8	A double blind randomized comparative trial of the efficacy of 7-day and 5-day courses of oral artesunate at 600 mg was studied in 89 Thai patients with uncomplicated falciparum malaria. Eighty patients completed the 28-day follow-up period. Artesunate was found to be well tolerated in either regimen. There was an increase of 7% in the cure rate obtained from a 7-day regimen. In 43 patients with …	1820640	Asia	Thailand
Bunnag, D.;Viravan, C.;Looareesuwan, S.;Karbwang, J.;Harinasuta, T.	1991	Double blind randomised clinical trial of oral artesunate at once or twice daily dose in falciparum malaria	The Southeast Asian journal of tropical medicine and public health	22	4	539-43	A double blind randomised comparative trial of the efficacy of daily dose (200 mg as an initial dose followed by 100 mg daily for another 4 days) and twice daily dose (100 mg 12 hourly for 2 doses on the first day, followed by 50 mg 12 hourly for another 8 doses) regimens of oral artesunate at 600 mg was studied in 59 Thai patients with uncomplicated falciparum malaria. Fifty patients had a compl…	1820641	Asia	Thailand
Barkakaty, B. N.;Narasimham, M. V.	1991	Efficacy of a low dose oral quinine therapy in Plasmodium falciparum cases of Assam, Meghalaya and Arunachal Pradesh in India	The Journal of communicable diseases	23	4	248-53	A low dose oral quinine schedule with 1050 mg in two divided doses daily for five days was tried for treatment of Plasmodium falciparum cases in Assam, Meghalaya and Arunachal Pradesh, in areas where resistance to chloroquine was confirmed. The drug schedule was found effective in 76.92 per cent cases. The treatment was also found effective in 45.55 per cent of the known chloroquine resistant P. …	1842806	Asia	India
Boulos, M.;V. Amato Neto;A. P. Dutra;S. M. Di Santi;M. Shiroma	1991	Frequency of malaria relapse due to Plasmodium vivax in a non-endemic region (Sao Paulo, Brazil)	Revista do Instituto de Medicina Tropical de Sao Paulo	33	2	143-6	Very few well-established information is available about the frequency and timeliness of relapses in cases of Plasmodium vivax malaria acquired in Brazil. So, we analysed a series of correctly treated patients observed out of endemic areas. The rate of relapses seen in Sao Paulo, which may represent that of the parasitosis in the whole country, was high, ranging from 7.5% to 24.5%, and early in m…	1844384	S.America	Brazil
Hien, T. T.;Tam, D. T.;Cuc, N. T.;Arnold, K.	1991	Comparative effectiveness of artemisinin suppositories and oral quinine in children with acute falciparum malaria	Transactions of the Royal Society of Tropical Medicine and Hygiene	85	2	210-1		1887472	Asia	Vietnam
Khan, M. A.;Rehman, G. N.;Qazi, S. A.	1991	Halofantrine hydrochloride--efficacy and safety in children with acute malaria	JPMA. The Journal of the Pakistan Medical Association	41	1	8-10	Thirty two children with symptomatic malaria due to P. vivax and P. Falciparum infections were treated with three doses of Halofantrine hydrochloride 8 mg/kg body weight every 6 hours. Mean fever clearance was 30 hours (range 24-48 hours). No significant clinical or biochemical side effects were observed. Symptoms cleared rapidly. Halofantrine hydrochloride was found to be highly effective and ap…	1900550	Asia	Pakistan
Held, T.;Trautmann, M.;Weinke, T.;Mravak, S.	1991	Clinical experiences with mefloquine in tropical malaria--a prospective study	Immunitat und Infektion	19	3	83-6	The therapeutic effects and side effects of mefloquine in falciparum malaria were investigated in an open prospective trial involving 20 patients. None of them had a history of neurologic or psychiatric disorders. Mefloquine was given in a total dose of 1500 mg base. The cure rate was 100%, fever and parasitemia subsided within 3 days. Side effects were vomitus and nausea in 25% of the patients. …	1916870	NA	NA
Denis, M. B.;Kouznetsov, R. L.;Giboda, M.	1991	In vivo response of multi-resistant Plasmodium falciparum infections to mefloquine and its combination with sulfadoxine/pyrimethamine in Cambodia	Folia parasitologica	38	2	187-8		1937278	Asia	Cambodia
Nagaraj, C.;Sugathan, N.;Chakrabarti, N. K.;Narasimham, M. V.	1991	An in vivo chloroquine sensitivity study in relation to low transmission potential and imported malaria in Kerala	The Journal of communicable diseases	23	2	100-2	The study highlights the presence of chloroquine resistant Plasmodium falciparum strains in Kerala state, India for the first time. The emergence of chloroquine resistant P. falciparum in a low transmission area is dependent on the imported cases while build up of resistance is mainly due to persistence of resistant parasites which have more opportunities for transmission.	1940213	Asia	India
Shao, B. R.;Huang, Z. S.;Shi, X. H.;Meng, F.	1991	A 5-year surveillance of sensitivity in vivo of Plasmodium falciparum to pyronaridine/sulfadoxine/pyrimethamine in Diaoluo area, Hainan Province	The Southeast Asian journal of tropical medicine and public health	22	1	65-7	The surveillance of sensitivity of P. falciparum to pyronaridine/sulfadoxine/pyrimethamine has been carried out in Diaoluo area in Hainan Province where chloroquine-resistant falciparum malaria is endemic, covering an area of 406 square kilometers, with a population of 3745 in 1986. From 1986 all outpatients diagnosed as falciparum malaria were administered with PND/S/P as the only antimalarial. …	1948261	Asia	China
Mogi, G.;Rampengan, T. H.	1991	The efficacy of sulphate quinine compared to fansidar in treating falciparum malaria in children 6 months-7 years old	Paediatrica Indonesiana	31	2011-04-03	104-10	From January 1989 until February 1990, 65 children suffering from falciparum malaria without complication at the Department of Child Health Medical School Sam Ratulangi University/Gunung Wenang Hospital Manado were randomly allocated into two groups. The first group was treated with sulphate quinine based on the dose of 30 mg/kg bw/day in three divided doses and the other one was treated with sin…	1956688	Asia	Indonesia
Silitonga, K.;Rampengan, T. H.	1991	Comparative efficacy study of combination fansidar-sulphate quinine and fansidar-HCl tetracycline in falciparum malaria in children above 7 years old	Paediatrica Indonesiana	31	2011-04-03	111-6	The objective of this study is to compare the results of treatment of children with falciparum malaria with the combinations of fansidar-sulphate quinine and fansidar-chlortetracycline as an alternative treatment of chloroquine resistant falciparum malaria. This study was carried out prospectively on 45 cases with the age equal or above 7 years, who had been admitted in the Pediatric Department, …	1956689	Asia	Indonesia
Liando, A.;Rampengan, T. H.	1991	Comparative efficacy of combination fansidar-sulphate quinine and fansidar-chloroquine in mixed malaria infections of P. falciparum-P. vivax in children	Paediatrica Indonesiana	31	2011-04-03	99-103	From January 1987 until March 1990, 61 children suffering from mixed malaria infections of P. falciparum and P. vivax entered the Department of Child Health Medical School Sam Ratulangi University/Gunung Wenang General Hospital, Manado. Only 41 patients were evaluated as 20 patients did not fulfill the inclusion criteria. Twenty patients were treated with fansidar-quinine (Group I), and 21 patien…	1956694	Asia	Indonesia
Sapak, P.;Garner, P.;Baea, M.;Narara, A.;Heywood, P.;Alpers, M.	1991	Ineffectiveness of amodiaquine against Plasmodium falciparum malaria in symptomatic young children living in an endemic malarious area of Papua New Guinea	Journal of tropical pediatrics	37	4	185-90	The standard in vivo 7-day test of drug resistance was conducted on 83 children with symptomatic P. falciparum infection, using a full 3-day course of amodiaquine. All children were living in an endemic malarious area of the East Sepik Province of Papua New Guinea. Analysis of blood amodiaquine levels by an ELISA method showed increased blood amodiaquine concentration with progressive days of tre…	1960777	Asia	Papua New Guinea
Pussard, E.;Lepers, J. P.;Clavier, F.;Raharimalala, L.;Le, B. J.;Frisk-Holmberg, M.;Bergqvist, Y.;Verdier, F.	1991	Efficacy of a loading dose of oral chloroquine in a 36-hour treatment schedule for uncomplicated plasmodium falciparum malaria	Antimicrobial agents and chemotherapy	35	3	406-9	The efficacy of a loading dose of 20 mg of chloroquine per kg of body weight per os given at intervals during the first day was evaluated in 27 patients in Madagascar with Plasmodium falciparum malaria. The conventional regimen of 25 mg/kg over 3 days (schedule 1) was thus compared with a regimen of 30 mg/kg over 2 days (schedule 2; one dose of 10 mg/kg followed by two doses of 5 mg/kg at 6-h int…	2039190	Africa	Madagascar
Carme, B.;Sathounkasi, C.;Mbitsi, A.;Ndounga, M.;Gay, F.;Chandenier, J.;Schmitt, J. L.;Samba, G.	1991	Comparative efficacy of chloroquine and amodiaquine (25 and 35 mg/kg) in school children infected with P. falciparum (Brazzaville, March 1990)	Bulletin de la Societe de pathologie exotique	84	1	77-9	The efficacy of 4 therapeutic schedules was compared in March and April 1990 in Brazzaville school children, aged between 6 and 8 years, with parasitaemia of at least 1,000 trophozoites of Plasmodium falciparum per mm3. It was possible to interpret 125 simplified in vivo tests. The results showed that the activity of amodiaquine is still relatively satisfactory. The activity of chloroquine was sl…	2065405	Africa	Democratic Republic of Congo
Bunnag, D.;Karbwang, J.;Harinasuta, T.	1992	Artemether in the treatment of multiple drug resistant falciparum malaria	The Southeast Asian journal of tropical medicine and public health	23	4	762-7	Artemether has the potential to be an alternative antimalarial for multiple drug resistant falciparum malaria. However, it has been associated with high recrudescent rates which may be due to incorrect dosage regimens. The dosage regimens are varied from country to contry. We have carried out a comparative study of two dosage regimens, ie 480 mg and 600 mg total dose given over 5 days in uncompli…	1298086	Asia	Thailand
Pietra, V.;Lamizana, L.;del, N. L.;Rotigliano, G.	1992	In vivo chemosensitivity of Plasmodium falciparum to chloroquine in Burkina Faso: development of resistance 1988-1990	Parassitologia	34	2011-03-01	131-4	A study of Plasmodium falciparum sensitivity to chloroquine was carried out in 1988 and 1990 in 5 localities, representatives of different climatic areas of Burkina Faso. The 7-day in vivo standard test performed in 1988 showed a total clearance failure of 25%. No significant difference with 1990 data was found, except for an increase of the resistance in the area of Fada N'Gourma, close to the b…	1339966	Africa	Burkina Faso
de Andrade, JG;de Andrade, AL; Araujo, ES; Oliveira, RM; Silva SA, Martelli CM, Zicker F.	1992	A randomized clinical trial with high dose of chloroquine for treatment of Plasmodium falciparum malaria in Brazil	Revista do Instituto de Medicina Tropical de Sao Paulo	34	5	467-73	This clinical trial compared parasitological efficacy, levels of in vivo resistance and side effects of oral chloroquine 25 mg/Kg and 50 mg/Kg in 3 days treatment in Plasmodium falciparum malaria with an extended followed-up of 30 days. The study enrolled 58 patients in the 25 mg/Kg group and 66 in the 50 mg/Kg group. All eligible subjects were over 14 years of age and came from Amazon Basin and …	1342112	S.America	Brazil
Looareesuwan, S.;Wilairatana, P.;Vanijanonta, S.;Kyle, D.;Webster, K.	1992	Efficacy of quinine-tetracycline for acute uncomplicated falciparum malaria in Thailand	Lancet	339	8789	369		1346445	Asia	Thailand
Looareesuwan, S.;Viravan, C.;Vanijanonta, S.;Wilairatana, P.;Suntharasamai, P.;Charoenlarp, P.;Arnold, K.;Kyle, D.;Canfield, C.;Webster, K.	1992	Randomised trial of artesunate and mefloquine alone and in sequence for acute uncomplicated falciparum malaria	Lancet	339	8797	821-4	The increasing frequency of therapeutic failures in falciparum malaria in Thailand shows an urgent need for effective drugs or drug combinations. Artesunate, a qinghaosu derivative, is effective in clearing parasitaemia rapidly, but the recrudescence rate can be as high as 50%. We have compared artesunate followed by mefloquine with each drug alone in acute, uncomplicated falciparum malaria. 127 …	1347854	Asia	Thailand
Karbwang, J.;Bangchang, K. N.;Thanavibul, A.;Bunnag, D.;Chongsuphajaisiddhi, T.;Harinasuta, T.	1992	Comparison of oral artemether and mefloquine in acute uncomplicated falciparum malaria	Lancet	340	8830	1245-8	Plasmodium falciparum malaria in Thailand is highly resistant to available antimalarials, and alternative drugs are needed urgently. Artemether is effective against falciparum malaria but associated with a high recrudescence rate. The proper dosage regimen remains to be defined. We have done a clinical trial comparing mefloquine 1250 mg in divided doses with oral artemether at 700 mg total dose g…	1359318	Asia	Thailand
Turaman, C.;Basco, L. K.;Le, B. J.	1992	Evaluating the efficacy of chloroquine in febrile Guinean children infected with Plasmodium falciparum by a simplified in vivo test	Bulletin of the World Health Organization	70	4	477-80	A modified version of a simplified in vivo test was applied to assess the susceptibility of Plasmodium falciparum to chloroquine among semi-immune febrile children in Kouroussa, Guinea. In 27% of cases, a partial response (RI/RII) to chloroquine was observed; the remainder showed a good response (S/RI). This test is both practical and useful to assess the efficacy of chloroquine at the intermedia…	1394781	Africa	Guinea
Ndifor, A. M.;Howells, R. E.;Ward, S. A.	1992	Chloroquine sensitivity of Plasmodium falciparum in vivo in a savanna town in Cameroon	Transactions of the Royal Society of Tropical Medicine and Hygiene	86	3	229-30	Chloroquine-resistant Plasmodium falciparum has been reported in the Sahel and forest regions of Cameroon since 1985. In vivo response to chloroquine treatment (25 mg/kg) was assessed in 19 patients with malaria in the savanna North-West province. 58% of the cases showed RII resistance to chloroquine. RIII resistance was suspected in one patient. Only 35% of cases showed complete parasite clearan…	1412637	Africa	Cameroon
Afari, E. A.;Akanmori, B. D.;Nakano, T.;Ofori-Adjei, D.	1992	Plasmodium falciparum: sensitivity to chloroquine in vivo in three ecological zones in Ghana	Transactions of the Royal Society of Tropical Medicine and Hygiene	86	3	231-2	4690 children aged 6-15 years in 5 urban and 4 rural communities in 3 ecological zones in Ghana were screened from June 1988 to December 1990 to provide suitable candidates for the World Health Organization standard in vivo test for susceptibility of Plasmodium falciparum to chloroquine. 1880 (40.1%) had parasitaemia, mostly (83.7-98.6%) due to P. falciparum infection. Of the 626 in vivo tests pe…	1412638	Africa	Ghana
ter Kuile, FO; Nosten, F; Thieren, M; Luxemburger, C; Edstein, MD; Chongsuphajaisiddhi T; Phaipun L; Webster HK; White NJ.	1992	High-dose mefloquine in the treatment of multidrug-resistant falciparum malaria	The Journal of infectious diseases	166	6	1393-400	The therapeutic efficacy and toxicity of a high-dose (25 mg/kg) mefloquine regimen (M25) and the currently recommended regimen of 15 mg/kg (M15) were compared in 199 patients with acute falciparum malaria in an area with deteriorating multidrug resistance on the Thai-Burmese border. The clinical and parasitologic responses were significantly more rapid with M25. The incidence of treatment failure…	1431257	Asia	Thailand
Sowunmi, A.;Oduola, A. M.;Salako, L. A.;Ogundahunsi, O. A.;Laoye, O. J.;Walker, O.	1992	The relationship between the response of Plasmodium falciparum malaria to mefloquine in African children and its sensitivity in vitro	Transactions of the Royal Society of Tropical Medicine and Hygiene	86	4	368-71	The clinical efficacy of two doses of mefloquine (15 and 25 mg/kg body weight) was evaluated in 85 children suffering from acute symptomatic falciparum malaria. The cure rate on day 28 was 100% in both groups. There was no significant difference (P > 0.05) in the mean parasite and fever clearance times in both groups (48.5 +/- 14.6 and 32.0 +/- 12.7 h respectively for the 25 mg/kg group and 49.0 …	1440804	Africa	Nigeria
Mulder, B.;Gazin, P.;Eggelte, T. A.;Cot, M.	1992	Increase of chloroquine resistance in vivo of Plasmodium falciparum over two years in Edea, south Cameroon	Transactions of the Royal Society of Tropical Medicine and Hygiene	86	4	376		1440808	Africa	Cameroon
Simooya, O.;Mutetwa, S.;Chandiwana, S.;Neill, P.;Mharakurwa, S.;Stein, M.	1992	A comparative study of the schizontocidal efficacy and safety of artemether versus chloroquine in uncomplicated malaria	The Central African journal of medicine	38	7	257-63	Forty-seven patients with uncomplicated falciparum malaria were randomly assigned to receive either artemether (n = 24), 9.6 mg/kg body weight intramuscularly over five days or chloroquine (n = 23), 25 mg/kg body weight orally. Patients were kept in hospital for seven days followed by review on days 14, 21 and 28. Five patients on chloroquine were withdrawn before day seven due to treatment failu…	1477874	Africa	Zimbabwe
Bunnag, D.;Karbwang, J.;Viravan, C.;Chitamas, S.;Harinasuta, T.	1992	Clinical trials of mefloquine with tetracycline	The Southeast Asian journal of tropical medicine and public health	23	3	377-82	A comparative trial of the combination of mefloquine or MSP with tetracycline was carried out in fifty-one adult Thai male patients with acute falciparum malaria. The patients were randomized to receive either the combination of tetracycline (250 mg qid for 7 days) with mefloquine 4 tablets (1,000 mg) or with MSP 4 tablets (one tablet contains 250 mg mefloquine, 500 mg sulfadoxine and 25 mg pyrim…	1488688	Asia	Thailand
Keuter, M.;Sanders, J.;Ronday, M.;Veltkamp, S.;Kamsteeg, H.;Schouten, E.;Khalumi, G.;Ngwawe, W.;Wetsteyn, J. C.;Brandling-Bennett, A. D.	1992	Parasitological, clinical and haematological response of children with Plasmodium falciparum to 4-aminoquinolines and to pyrimethamine-sulfadoxine with quinine in western Kenya	Tropical and geographical medicine	44	2011-02-01	1-8	Children with Plasmodium falciparum infections in Western Province, Kenya, were studied in 1987 for their parasitological, clinical and haematological response to chloroquine, to amodiaquine and to pyrimethamine-sulfadoxine plus quinine. Ninety-eight children under 5 years of age were treated in 1 of 2 hospitals. Of the 56 patients treated with chloroquine base 25 mg/kg, 91% had resistant infecti…	1496699	Africa	Kenya
Vollenhoven, I.;Wetsteyn, J. C.	1992	Chloroquine resistance of Plasmodium falciparum in Bukumbi, Tanzania. An in vivo study	Tropical and geographical medicine	44	2011-02-01	182-5	The sensitivity of Plasmodium falciparum to chloroquine was studied in 42 children in Bukumbi, Tanzania. The standard WHO in vivo test was used, and chloroquine phosphate 25 mg base/kg was administered in divided doses over three days. From the 42 patients 13 (31%) were sensitive to chloroquine and 29 (69%) had not cleared their parasites on day 7. From the resistant cases, 1 showed RI resistance…	1496715	Africa	Tanzania
Rukaria, R. M.;Ojwang, S. B.;Oyieke, J. B.;Kigondu, C. B.	1992	In vivo and in vitro response of Plasmodium falciparum to chloroquine in pregnant women in Kilifi district, Kenya	East African medical journal	69	6	306-10	In a malaria-endemic area of the Coast of Kenya with chloroquine resistant Plasmodium falciparum, we determined the prevalence and density of falciparum infection in gravid women and assessed the in vivo and in vitro parasite response to a regimen of chloroquine 25 mg/kg body weight divided over three days. P. falciparum infections were present in 65 (21.7%) of 300 pregnant women. The proportion …	1505414	Africa	Kenya
Ketrangsee, S.;Vijaykadga, S.;Yamokgul, P.;Jatapadma, S.;Thimasarn, K.;Rooney, W.	1992	Comparative trial on the response of Plasmodium falciparum to halofantrine and mefloquine in Trat Province, eastern Thailand	The Southeast Asian journal of tropical medicine and public health	23	1	55-8	With the appearance of strains of Plasmodium falciparum in the Trat Province, eastern Thailand, reported to have developed resistance to mefloquine there is a need for an alternative drug. This comparative trial with mefloquine and halofantrine has demonstrated extremely low cure rates with both drugs (33.3% and 28.13% respectively), cross-resistance is suggested.	1523479	Asia	Thailand
Brasseur, P.;Kouamouo, J.;Moyou-Somo, R.;Druilhe, P.	1992	Multi-drug resistant falciparum malaria in Cameroon in 1987-1988. II. Mefloquine resistance confirmed in vivo and in vitro and its correlation with quinine resistance	The American journal of tropical medicine and hygiene	46	1	8-14	To further document the phenomenon of Plasmodium falciparum resistance to mefloquine formerly described in Cameroon, complementary in vivo and in vitro studies were conducted. Two hundred six P. falciparum isolates were studied in vitro using an isotopic microassay with mefloquine solutions prepared daily. Using the cutoff limit of 30 nmol, 26 (20%) of 133 isolates from the northern part of the c…	1536387	Africa	Cameroon
McClean, K. L.;Hitchman, D.;Shafran, S. D.	1992	Norfloxacin is inferior to chloroquine for falciparum malaria in northwestern Zambia: a comparative clinical trial	The Journal of infectious diseases	165	5	904-7	Fluoroquinolones are active against Plasmodium falciparum in vitro. In a prospective, randomized, comparative trial, norfloxacin, 400 mg twice a day for 3 days, was compared with a standard course of chloroquine in semiimmune adults with symptomatic falciparum malaria in northwestern Zambia, where chloroquine resistance is uncommon. Patients were followed for 28 days. The trial was terminated aft…	1569341	Africa	Zambia
Richard-Lenoble, D.;Kombila, M.;Martz, M.;Gendrel, D.;Gendrel, C.;Moreno, J. L.;Engohan, E.;Blanc, G.;Dupasquier, I.;Iannascoli, F.	1992	Efficacy, safety and acceptability of halofantrine in the treatment of acute Plasmodium falciparum malaria in African children (Gabon)	Journal of tropical pediatrics	38	1	7-11	Halofantrine chlorhydrate 2 per cent suspension was given to 50 children (mean age 6.2 years in a dose of 8 mg/kg three times a day as a single day treatment. The children were born and lived in Gabon, where malaria transmission is continuous. They all had acute Plasmodium falciparum malaria. The children were kept in hospital for 5 days, and regularly followed over a 15-day period. The 50 childr…	1573696	Africa	Gabon
Mvondo, J.L.;James, M.A.;Campbell, C.C.;	1992	Malaria and pregnancy in Cameroonian women. Effect of pregnancy on Plasmodium falciparum parasitemia and the response to chloroquine	Tropical Medicine and Parasitology	43	1	1-5	The interaction between malaria and pregnancy was investigated in an epidemiologic study conducted in Mfou, a rural community in Cameroon. The study consisted of both cross-sectional and longitudinal analyses involving 225 pregnant women and 75 nonpregnant controls. Information was obtained by a standardized questionnaire to determine the pattern of antimalarial drug use. The parasitologic respon…	1598501	Africa	Camaroon
Sowunmi, A.;Salako, L. A.	1992	Evaluation of the relative efficacy of various antimalarial drugs in Nigerian children under five years of age suffering from acute uncomplicated falciparum malaria	Annals of tropical medicine and parasitology	86	1	1-8	A parallel group-randomized comparison of the therapeutic efficacy of chloroquine (CQ), amodiaquine (AM), quinine (QN), sulphadoxine-pyrimethamine (S-P), mefloquine 15 mg kg-1 (M15) and mefloquine 25 mg kg-1 (M25) in acute symptomatic uncomplicated falciparum malaria was carried out in 325 children under the age of five years in Ibadan, southwestern Nigeria, using the 28-day in vivo test. The par…	1616392	Africa	Nigeria
Weinke, T.;Loscher, T.;Fleischer, K.;Kretschmer, H.;Pohle, H. D.;Kohler, B.;Schlunk, T.;Clemens, R.;Bock, H. L.	1992	The efficacy of halofantrine in the treatment of acute malaria in nonimmune travelers	The American journal of tropical medicine and hygiene	47	1	1-5	A multicenter prospective trial was performed to investigate the efficacy and the tolerability of halofantrine in nonimmune patients with malaria imported from areas with drug-resistant falciparum parasites (mainly Africa). Forty-five of the 74 subjects were treated with a one-day regimen (3 x 500 mg) of halofantrine, and the other 29 received the same regimen with an additional treatment on day …	1636873	Africa	Travellers
Watt, G.;Loesuttivibool, L.;Shanks, G. D.;Boudreau, E. F.;Brown, A. E.;Pavanand, K.;Webster, H. K.;Wechgritaya, S.	1992	Quinine with tetracycline for the treatment of drug-resistant falciparum malaria in Thailand	The American journal of tropical medicine and hygiene	47	1	108-11	Reports of deteriorating quinine efficacy prompted us to investigate the ability of quinine-tetracycline to clear parasites and fever from patients with multiple drug-resistant Plasmodium falciparum infections. Past and present treatment results were compared at two study sites along the Thai-Cambodian border. In northeastern Thailand, quinine-tetracycline cleared parasites more quickly in 1990 t…	1636876	Asia	Thailand
Hatin, I.;Trape, J. F.;Legros, F.;Bauchet, J.;Le, B. J.	1992	Susceptibility of Plasmodium falciparum strains to mefloquine in an urban area in Senegal	Bulletin of the World Health Organization	70	3	363-7	A total of 47 nonimmune febrile patients from Pikine, Senegal, with greater than 1,000 Plasmodium falciparum asexual forms per microliter whole blood were given 12.5 mg per kg body weight of mefloquine in a single oral dose and were followed up daily until day 7 and also on day 14 of the study. Seven of the patients who vomited, four who had 4-aminoquinolines in their blood, and five dropouts wer…	1638665	Africa	Senegal
Murphy, G. S.;Basri, H.;Purnomo;Andersen, E. M.;Bangs, M. J.;Mount, D. L.;Gorden, J.;Lal, A. A.;Purwokusumo, A. R.;Harjosuwarno, S.;et al.	1993	Vivax malaria resistant to treatment and prophylaxis with chloroquine	Lancet	341	8837	96-100	Chloroquine has been the treatment of choice for vivax malaria for more than 40 years. Lately, several case-reports have suggested the emergence of resistance to chloroquine in Plasmodium vivax in Papua New Guinea and Indonesia. We undertook prospective treatment and prophylaxis trials of chloroquine in children and adults with vivax malaria living in Irian Jaya (Indonesia New Guinea). 46 village…	8093414	Asia	Indonesia
ter Kuile, FO; Dolan, G; Nosten, F; Edstein, MD; Luxemburger, C; Phaipun, L; Chongsuphajaisiddhi, T; Webster HK; White NJ.	1993	Halofantrine versus mefloquine in treatment of multidrug-resistant falciparum malaria	Lancet	341	8852	1044-9	The continuing spread of multidrug resistance in Plasmodium falciparum malaria makes the search for alternative treatments ever more urgent. We have investigated the relative efficacy of halofantrine and mefloquine in two paired randomised trials on the Thai-Burmese border, a multidrug-resistant area. In the first trial, 198 patients with acute uncomplicated falciparum malaria were randomly assig…	8096956	Asia	Thailand
Hagos, B.;Khan, B.;Ofulla, A. V.;Kariuki, D.;Martin, S. K.	1993	Response of falciparum malaria to chloroquine and three second line antimalarial drugs in a Kenyan coastal school age population	East African medical journal	70	10	620-3	Ambulatory rural school children in the Mombasa area with P. falciparum parasitaemia were examined and randomly assigned to treatment with one of three second-line antimalarials--amodiaquine, pyrimethamine/sulphadoxine (P/SD) and pyrimethamine/sulfalene (P/SL). Clinical signs and parasitaemia were followed daily for the first week and on days 14 and 28. WHO Mark II schizont inhibition tests were …	8187656	Africa	Kenya
Jagota, S. C.	1993	Halofantrine in the treatment of acute malaria: a multi-centre study in 268 patients	Current medical research and opinion	13	3	140-4	The clinical efficacy and tolerability of halofantrine, a new antimalarial schizontocide, was studied in a multi-centre trial involving 268 patients ranging in age from 6 months to 58 years. The patients were suffering from acute uncomplicated malaria due to either P. vivax or P. falciparum. Patients were treated orally with 3 doses of halofantrine hydrochloride, 500 mg/6-hourly in adults or 8 mg…	8222741	Asia	India
Nosten, F.;ter, K. F.;Thwai, K. L.;Maelankirri, L.;White, N. J.	1993	Spiramycin does not potentiate quinine treatment of falciparum malaria in pregnancy	Transactions of the Royal Society of Tropical Medicine and Hygiene	87	3	305-6		8236401	Asia	Thailand
Fadat, G.;Louis, F. J.;Louis, J. P.;Le, B. J.	1993	Efficacy of micronized halofantrine in semi-immune patients with acute uncomplicated falciparum malaria in Cameroon	Antimicrobial agents and chemotherapy	37	9	1955-7	Fifty subjects with acute uncomplicated falciparum malaria were treated orally with a new micronized formulation of halofantrine. The dose given corresponded to one-half the normal dose for the standard formulation. Parasitemia cleared in all subjects within 78 h. There was recrudescence of falciparum malaria in seven subjects after day 14. The mean +/- standard deviation clearance times of paras…	8239611	Africa	Cameroon
Smithuis, F. M.;van, W. J. B.;Nordlander, E.;Vantha, W. S.;ter, K. F. O.	1993	Comparison of two mefloquine regimens for treatment of Plasmodium falciparum malaria on the northeastern Thai-Cambodian border	Antimicrobial agents and chemotherapy	37	9	1977-81	In 1991 and 1992, a prospective randomized trial was conducted on the northern Thai-Cambodian border. That trial compared the efficacy and tolerance of two mefloquine regimens for the treatment of uncomplicated Plasmodium falciparum malaria in an area with multi-drug-resistant P. falciparum. The resolution of fever and other symptoms was faster with high-dose mefloquine (25 mg/kg of body weight […	8239616	Asia	Thailand
Sowunmi, A.;Akindele, J.A.;Omitowoju, G.O.;Omigbodun, A.O.;Oduola, A.M.;Salako, L.A.	1993	Intramuscular sulfadoxine-pyrimethamine in uncomplicated chloroquine-resistant falciparum malaria during pregnancy	Transactions of the Royal Society of Tropical Medicine and Hygiene	87	4	472		8249086	Africa	Nigeria
Kremsner, P. G.;Winkler, S.;Brandts, C.;Graninger, W.;Bienzle, U.	1993	Curing of chloroquine-resistant malaria with clindamycin	The American journal of tropical medicine and hygiene	49	5	650-4	A randomized comparative trial for treating adult patients with Plasmodium falciparum malaria was performed in Lambarene, Gabon. Forty-two patients received chloroquine (25 mg/kg for 48 hr) and 38 patients received clindamycin (5 mg/kg twice a day, for five days). Chloroquine treatment cured 15 patients (36%). Twenty patients (48%) showed recrudescent malaria by day 28 of follow-up (RI resistance…	8250107	Africa	Gabon
Fowler, V. G., Jr.;Lemnge, M.;Irare, S. G.;Malecela, E.;Mhina, J.;Mtui, S.;Mashaka, M.;Mtoi, R.	1993	Efficacy of chloroquine on Plasmodium falciparum transmitted at Amani, eastern Usambara Mountains, north-east Tanzania: an area where malaria has recently become endemic	The Journal of tropical medicine and hygiene	96	6	337-45	In order to assess the response of newly endemic falciparum malaria to currently used antimalarials, a field study was conducted in Amani, Tanzania. The efficacy of chloroquine (CQ) on Plasmodium falciparum was assessed by in-vivo and in-vitro methods. Fifty-four patients with pure falciparum malaria were treated with CQ and followed daily for 3 days and weekly for one month. Eighty-three per cen…	8254710	Africa	Tanzania
Ronn, A. M;Bygbjerg, I. C.	1993	[Recurrence problems with preventive primaquine treatment in patients with malaria]	Ugeskrift for laeger	155	48	3901-4	Standard treatment of P. ovale and P. vivax malaria is 1500 mg of chloroquine base given over three days followed by 15 mg of primaquine base daily for 14 days. At the Department of Infectious Diseases, Rigshospitalet, Copenhagen an increasing number of cases of relative by primaquine-resistant malaria have been observed. The side effects of primaquine are mainly gastrointestinal. Primaquine may …	8273193		Denmark
Wezam, A.	1993	Plasmodium falciparum sensitivity to antimalarials at Humera, northwestern Ethiopia	Ethiopian medical journal	31	4	271-6	Between September 5 and 25, 1991, the susceptibility of P. falciparum to chloroquine and sulfadoxine-pyrimethamine (SP) was measured in vivo in 47 semi-immune cases at Humera-Northwestern Ethiopia using the simplified in vivo test. The objective of the study was to obtain baseline data, and to suggest first and second line drugs. A 25mg/kg dose of chloroquine base was administered over a three-da…	8287862	Africa	Ethiopia
Rao, K. S.;Kamalakar, K. V.	1993	Efficacy and safety of halofantrine in acute malaria	The Journal of the Association of Physicians of India	41	8	507-8	Clinical trial of halofantrine was conducted in 32 cases of acute malaria. Twenty four patients with P. vivax and eight patients with P. falciparum infection were treated with 3 doses of halofantrine (500 mg each) orally, after food, at intervals of 6 hours. Mean parasite clearance time of P. vivax was 57.75 h and for P falciparum 75 h and mean defervescence time was 31.08 h and 34 h respectively…	8294355	Asia	India
Elhassan, I. M.;Satti, G. H.;Ali, A. E.;Fadul, I.;Elkhalifa, A. A.;Abedelrahim, A. M.;Ming, C.;Theander, T. G.	1993	The efficacy of artemether in the treatment of Plasmodium falciparum malaria in Sudan	Transactions of the Royal Society of Tropical Medicine and Hygiene	87	6	685-6	The efficacy of artemether (a qinghaosu derivative) administered intramuscularly for the treatment of Plasmodium falciparum malaria was compared to quinine in an open randomized trial including 54 patients in eastern Sudan, where chloroquine resistance is common. The artemether treatment (5 d intramuscular regimen) was effective and the drug was well tolerated. All patients had cleared the parasi…	8296377	Africa	Sudan
Roche, J.;Benito, A.;Ayecaba, S.;Amela, C.;Molina, R.;Alvar, J.	1993	Resistance of Plasmodium falciparum to antimalarial drugs in Equatorial Guinea	Annals of tropical medicine and parasitology	87	5	443-9	One hundred and sixty-six children from Equatorial Guinea, all under 10 years of age and with acute uncomplicated falciparum malaria, were randomly allocated to four groups and treated with one of the following regimens: chloroquine or amodiaquine (25 mg base/kg body weight over 3 days), quinine (8 mg/kg every 8 h for 3 or 5 days), and sulphadoxine-pyrimethamine (25-1.25 mg/kg, in one dose). The …	8311568	S.America	Equatorial Guinea
Guo, X. B.	1993	Randomised comparison on the treatment of falciparum malaria with dihydroartemisinin and piperaquine	Chinese Medical Journal	73	10	602-4, 638	In 1988, 50 cases each of falciparum malaria were treated by dihydroartemisin (360 mg in 5 days and 480 mg in 7 days respectively), and compared randomly with piperaquine phosphate group. The results showed that the plasmodium of falciparal malaria in Dong Fang County, Hainan province, is much more resistant to piperaquine phosphate, in the 51 cases treated by piperaquine, 33.3% were sensitive, 1…	8313183	Asia	China
Edrissian, G. H.;Afshar, A.;Sayedzadeh, A.;Mohsseni, G.;Satvat, M. T.	1993	Assessment of the response in vivo and in vitro of Plasmodium falciparum to sulphadoxine-pyrimethamine in the malarious areas of Iran	The Journal of tropical medicine and hygiene	96	4	237-40	Studies of drug resistance of Plasmodium falciparum cases from SE Iran were carried out in vivo and in vitro during 1990-91. In a study of 26 chloroquine-resistant infections, using amodiaquine (25 mg kg-1 over 3 days), followed by two-thirds of the standard dose of sulphadoxine-pyrimethamine, six cases were resistant at the RI(3) and RII(3) levels. An additional study testing the standard dose o…	8345544	Asia	Iran
Bunnag, D.;Viravan, C.;Karbwang, J.;Looareesuwan, S.;Chittamas, S.;Harinasuta, T.;Serville, P.;Horton, J.	1993	Clinical trials with halofantrine in acute uncomplicated falciparum malaria in Thailand	The Southeast Asian journal of tropical medicine and public health	24	1	43-8	The antimalarial efficacy of halofantrine was compared with mefloquine in an open-label, randomized comparative trial in adult male patients with acute uncomplicated falciparum malaria. Twenty-eight patients received halofantrine and 27 received mefloquine. Halofantrine was administered in 3 doses of 500 mg at 6 hour intervals and mefloquine was administered in divided doses of 1,250 mg or 1,500 …	8362305	Asia	Thailand
Tripathi, K. D.;Sharma, A. K.;Valecha, N.;Kulpati, D. D.	1993	Curative efficacy of norfloxacin in falciparum malaria	The Indian journal of medical research	97		176-8	Fifteen patients of uncomplicated falciparum malaria from Delhi were treated with norfloxacin (10 with 400 mg, 5 with 800 mg, both twice daily) for 3 days and the response was measured according to the WHO extended in vivo test criteria. The lower dose produced S response in two, RII response in five and RIII response in three patients, while the higher dose produced S response in four and RI res…	8406645	Asia	India
Okoyeh, J. N.;Lege-Oguntoye, L.;Emembolu, J. O.;Sarki, U.;Slotboom, A. B.	1993	Sensitivity of Plasmodium falciparum to pyrimethamine in vivo and to sulphadoxine/pyrimethamine combination in vitro in pregnant women of northern Nigeria	Journal of Tropical Medicine and Hygiene	96	1	56-9	The in-vivo response of Plasmodium falciparum to a single dose of 25 mg pyrimethamine was evaluated in pregnant women in a semi-rural area of Zaria, northern Nigeria. Forty-four women were enrolled in the study and followed up for 14 days. Thirty-one (70%) of the women had cleared their parasitaemia by Day 7 and they remained parasite negative throughout the 14-day period of observation. The MPCT…	8429576	Africa	Nigeria
Weinke, T.;Nothdurft, H. D.;Kretschmer, H.;Fleischer, K.;Loscher, T.;Braendli, B.;Markwalder, K.;Schlunk, T.;Clemens, R.;Bock, H. L.	1993	Halofantrine in the treatment of imported malaria in nonimmune travelers	Deutsche medizinische Wochenschrift (1946)	118	8	254-9	The efficacy (criteria: cure rate, time to resolution of fever or absence of parasites) and safety (criteria: clinical side effects, altered laboratory parameters) of halofantrin were investigated in a multi-centre study of 96 non-immune patients (71 men, 25 women, mean age 34.3 [21-62] years) with malaria imported from regions of high resistance into Germany or Switzerland. The initial 63 patien…	8444102	Travellers	Travellers
Nguyen, D. S.;Dao, B. H.;Nguyen, P. D.;Nguyen, V. H.;Le, N. B.;Mai, V. S.;Meshnick, S. R.	1993	Treatment of malaria in Vietnam with oral artemisinin	The American journal of tropical medicine and hygiene	48	3	398-402	In this study, 638 patients with either Plasmodium falciparum or P. vivax malaria were treated with artemisinin (qinghaosu) that was isolated and formulated into tablets and capsules in Vietnam. In all cases, artemisinin treatment resulted in a rapid clearance of parasitemia and fever. Recrudescence rates were highest in those groups receiving treatment for five or less days (50%), but were betwe…	8470777	Asia	Vietnam
Feillet, N.;Agnamey, P.;Brasseur, P.;Druilhe, P.	1993	In vivo resistance of Plasmodium falciparum to chloroquine in Anjouan (Comoros)	Bulletin de la Societe de pathologie exotique	86	1	48-51	An in vivo study of P. falciparum sensitivity to chloroquine was conducted at Anjouan island (Republique federale islamique des Comores) from December 1990 to March 1991. The 27 patients included in the study were given chloroquine at a dose regimen of 25 mg/kg over 3 days and were followed up 7 days. Six patients (22.2%) still harboured parasites up to day 7, thus showing a RII/RIII level of res…	8504263	Africa	Comoros
Okoyeh, J. N.;Lege-Oguntoye, L.;Emembolu, J. O.;Sarki, U.;Slotboom, A. B.	1993	Sensitivity of Plasmodium falciparum to chloroquine in pregnant women in Zaria, northern Nigeria	Tropical and Geographical Medicine	45	2	56-8	Thirty-five pregnant women with Plasmodium falciparum parasitaemia were treated with chloroquine 25 mg/kg body weight over 3 days. They were followed up in vivo by use of a modified 14-day WHO extended field test. In vitro sensitivity of the parasite isolates to chloroquine was assessed by using the WHO microtest method. All pregnant women were aparasitaemic by day 7 and there was no parasite rea…	8511811	Africa	Nigeria
Gaudebout, C.;Pussard, E.;Clavier, F.;Gueret, D.;Le, B. J.;Brandicourt, O.;Verdier, F.	1993	Efficacy of intramuscular amopyroquin for treatment of Plasmodium falciparum malaria in the Gabon Republic	Antimicrobial agents and chemotherapy	37	5	970-4	The efficacy of a 12-mg/kg (of body weight) intramuscular amopyroquin (ApQ) regimen (two successive 6-mg/kg injections at a 24-h interval), previously established from kinetic studies on healthy volunteers and multicenter studies on patients with malaria, was investigated in 152 patients (children and adults) in Gabon with Plasmodium falciparum malaria. All children in the present study (ages, 1 …	8517723	Africa	Gabon
Landgraf, B.;Kollaritsch, H.;Wiedermann, G.;Wernsdorfer, W. H.	1994	Plasmodium falciparum: susceptibility in vitro and in vivo to chloroquine and sulfadoxine-pyrimethamine in Ghanaian schoolchildren	Transactions of the Royal Society of Tropical Medicine and Hygiene	88	4	440-2	In Ghana, resistance of Plasmodium falciparum to chloroquine was observed for the first time in 1986. By the end of 1991 it had reached a high frequency and a substantial degree. A combined study in vivo and in vitro of the response of P. falciparum to chloroquine and sulfadoxine/pyrimethamine was carried out in Madina, Accra, in the coastal area of Ghana, late in 1991. 96 valid tests in vivo wer…	7570837	Africa	Ghana
Mulder, B.;Ringwald, P.;Arens, T.;Louis, F.	1994	Stabilization of chloroquine resistance in vivo of Plasmodium falciparum in Edea, south Cameroon	Transactions of the Royal Society of Tropical Medicine and Hygiene	88	4	445		7570840	Africa	Cameroon
Westman, L.;Kamanda, S.;Hellgren, U.;Ericsson, O.;Rombo, L.	1994	Rectal administration of chloroquine for treatment of children with malaria	Transactions of the Royal Society of Tropical Medicine and Hygiene	88	4	446		7570841	Africa	Sierra Leone
Henry, M. C.;Docters, v. L. W.;Watson, P.;Jansen, A.;Jacobs, K.;Zwart, F.;Agricola, K.;Nahounou, N.;Dossou, J.;Eggelte, T. E.	1994	In vivo sensitivity of Plasmodium falciparum to chloroquine in rural areas of Cote d'Ivoire	Acta tropica	58	2011-04-03	275-81	In vivo testing of Plasmodium falciparum sensitivity to chloroquine was carried out in four rural sites of differing socio-geographical environment in Cote d'Ivoire. Of a total of 1282 patients of all ages with fever or previous history of fever, 649 were slide positive, with 435 patients with a pure P. falciparum infection; 191 fulfilled all the criteria for inclusion in this study, and 113 comp…	7709866	Africa	Cote d'Ivoire
Penali, L. K.;Assi-Coulibaly, L.;Kaptue, B.;Konan, D.;Ehouman, A.	1994	Parasitological and clinical response to amodiaquine versus chloroquine in the treatment of Plasmodium falciparum malaria in children in an endemic area	Bulletin de la Societe de pathologie exotique	87	4	244-7	The therapeutic management of malaria in endemic regions is now hampered not only by the limited number of antimalarial agents, but also by the appearance of chemoresistant plasmodial strains and by the sometimes severe adverse effects related to the use of some of these drugs. Between January and July 1993, 100 patients presenting with symptomatic Plasmodium falciparum malaria were randomised to…	7866044	Africa	Cote d'Ivoire
Tran, T. H.;Arnold, K.;Nguyen, T. H.;Pham, P. L.;Nguyen, T. D.;Bui, M. C.;Le, M. T.;Mach, Q. P.;Le, H. V.;Pham, P. M.	1994	Single dose artemisinin-mefloquine treatment for acute uncomplicated falciparum malaria	Transactions of the Royal Society of Tropical Medicine and Hygiene	88	6	688-91	For the treatment of patients with acute falciparum malaria, the combination of artemisinin as a single dose with a single dose of mefloquine was studied in 4 separate prospective trials, comprising 405 adults and 139 children with uncomplicated falciparum malaria in 2 in-patient and 2 rural out-patient studies in Viet Nam. Adults received oral artemisinin and children artemisinin suppositories. …	7886773	Asia	Vietnam
Kamugisha, J.;Kipp, W.;Burnham, G.	1994	In vivo sensitivity of Plasmodium falciparum to chloroquine, amodiaquine and sulfadoxine-pyrimethamine in western Uganda	Tropical and geographical medicine	46	6	364-5	In an in vivo study of antimalarial sensitivity in Kabarole District, Western Uganda, 82% of asymptomatic malarial infections and 86% of symptomatic infections were chloroquine sensitive. Of persons with symptomatic malaria, 88% were sensitive to sulfadoxine-pyrimethamine (Fansidar). Amodiaquine cleared parasites in all persons in whom it was used. Over the course of the past five years, there ap…	7892705	Africa	Uganda
Nosten, F.;Luxemburger, C.;ter, K. F. O.;Woodrow, C.;Eh, J. P.;Chongsuphajaisiddhi, T.;White, N. J.	1994	Treatment of multidrug-resistant Plasmodium falciparum malaria with 3-day artesunate-mefloquine combination	The Journal of infectious diseases	170	4	971-7	Studies of 652 adults and children with acute uncomplicated falciparum malaria were done to determine the optimum treatment of multidrug-resistant Plasmodium falciparum malaria on the Thai-Burmese border. Single-dose artesunate (4 mg/kg) plus mefloquine (25 mg of base/kg) gave more rapid symptomatic and parasitologic responses than high-dose mefloquine alone but did not improve cure rates. Three …	7930743	Asia	Thailand
Looareesuwan, S.;Vanijanonta, S.;Viravan, C.;Wilairatana, P.;Charoenlarp, P.;Lasserre, R.;Canfield, C.;Kyle, D. E.;Webster, H. K.	1994	Randomised trial of mefloquine-tetracycline and quinine-tetracycline for acute uncomplicated falciparum malaria	Acta tropica	57	1	47-53	The combination of mefloquine plus tetracycline was compared with quinine plus tetracycline in a randomised therapeutic trial in 102 patients with acute uncomplicated falciparum malaria in Thailand. Quinine plus tetracycline is considered the standard treatment for the highly drug-resistant strains of P. falciparum found in this area. Fifty patients received mefloquine (750 mg given immediately, …	7942354	Asia	Thailand
Nevill, C. G.;Verhoeff, F. H.;Munafu, C. G.;ten, H. W. R.;van, d. K. H. J.;Were, J. B.	1994	A comparison of amodiaquine and chloroquine in the treatment therapy of falciparum malaria in Kenya	East African medical journal	71	3	167-70	During June to August 1989, 158 symptomatic outpatients with P. falciparum malaria were randomly treated with either amodiaquine or chloroquine 25 mg/kg, divided over three days. Amodiaquine (Camoquin, Parke-Davis) was significantly more effective in terms of the rate of parasite clearance, 2.4 versus 3.1 days; parasite clearance day 7; 87% versus 41%; and clinical amelioration, 98% versus 68%. M…	7956864	Africa	Kenya
Schultz, L. J.;Steketee, R. W.;Macheso, A.;Kazembe, P.;Chitsulo, L.;Wirima, J. J.	1994	The efficacy of antimalarial regimens containing sulfadoxine-pyrimethamine and/or chloroquine in preventing peripheral and placental Plasmodium falciparum infection among pregnant women in Malawi	The American journal of tropical medicine and hygiene	51	5	515-22	To define an effective and deliverable antimalarial regimen for use during pregnancy, pregnant women at highest risk of malaria (those in their first or second pregnancy) in an area of Malawi with high transmission of chloroquine (CQ)-resistant Plasmodium falciparum were placed on CQ and/or sulfadoxine-pyrimethamine (SP). Of 38 pregnant women who received CQ treatment followed by weekly CQ prophy…	7985742	Africa	Malawi
Pandya, A. P.;Barkakaty, B. N.;Narasimham, M. V.	1994	Comparative efficacy of chloroquine and amodiaquine in Plasmodium falciparum strain of north-eastern India	The Journal of communicable diseases	26	2	61-7	The present study describes the comparative efficacy of chloroquine and amodiaquine in two different presumptive therapy areas of north eastern India. The study recorded insignificant differences in respect of Mean Parasite Clearance Time (MPCT) of sensitive cases, MPCT and Mean Parasite Recrudescence Time (MPRT) of RI resistant cases and recrudescence rate in chloroquine and amodiaquine therapy …	7989677	Asia	India
Looareesuwan, S.;Viravan, C.;Vanijanonta, S.;Wilairatana, P.;Charoenlarp, P.;Canfield, C. J.;Kyle, D. E.	1994	Randomized trial of mefloquine-doxycycline, and artesunate-doxycycline for treatment of acute uncomplicated falciparum malaria	The American journal of tropical medicine and hygiene	50	6	784-9	One hundred nine adult patients with acute uncomplicated falciparum malaria were randomly selected to receive combinations of either doxycycline plus mefloquine or doxycycline plus artesunate. Fifty-four patients received mefloquine (1,250 mg divided between two doses of 750 and 500 mg six hours apart) with doxycycline and 55 patients received artesunate (300 mg total for 2.5 days; 100 mg followe…	8024075	Asia	Thailand
Kremsner, P. G.;Wildling, E.;Jenne, L.;Graninger, W.;Bienzle, U.	1994	Comparison of micronized halofantrine with chloroquine-antibiotic combinations for treating Plasmodium falciparum malaria in adults from Gabon	The American journal of tropical medicine and hygiene	50	6	790-5	Multidrug resistance of Plasmodium falciparum is spreading throughout Africa. In Lambarene, Gabon where chloroquine-resistant malaria is prevalent, a randomized comparative trial with three regimens for treating P. falciparum malaria in adults was performed. One hundred two patients evaluated received either a new micronized formulation of halofantrine (8 mg/kg every 6 hr in three doses) (group H…	8024076	Africa	Gabon
Luxemburger, C.;ter, K. F. O.;Nosten, F.;Dolan, G.;Bradol, J. H.;Phaipun, L.;Chongsuphajaisiddhi, T.;White, N. J.	1994	Single day mefloquine-artesunate combination in the treatment of multi-drug resistant falciparum malaria	Transactions of the Royal Society of Tropical Medicine and Hygiene	88	2	213-7	The therapeutic efficacy and toxicity of a combination of low dose mefloquine (15 mg/kg) plus artesunate 10 mg/kg in one day (MA) was compared with the currently used regimen of high dose mefloquine (25 mg/kg) (MQ) in 552 patients with uncomplicated falciparum malaria in an area of multi-drug resistance on the Thai-Burmese border. MA gave faster clinical and parasitological responses and prevente…	8036679	Asia	Thailand
Bunnag, D.;Karbwang, J.;Thanavibul, A.;Chittamas, S.;Ratanapongse, Y.;Chalermrut, K.;Bangchang, K. N.;Harinasuta, T.	1994	High dose of primaquine in primaquine resistant vivax malaria	Transactions of the Royal Society of Tropical Medicine and Hygiene	88	2	218-9	The efficacy of low dose chloroquine, characteristic pattern of relapse and the relapse rate in vivax malaria after high dose primaquine were investigated in 167 Thai patients. 87 patients were allocated at random to receive 300 mg, and 80 received 450 mg of chloroquine on the first day of admission. All patients in both groups showed a rapid response with comparable fever clearance times (27.3 v…	8036680	Asia	Thailand
Li, G. Q.;Guo, X. B.;Fu, L. C.;Jian, H. X.;Wang, X. H.	1994	Clinical trials of artemisinin and its derivatives in the treatment of malaria in China	Transactions of the Royal Society of Tropical Medicine and Hygiene	88 Suppl 1		s5-6	Since 1979 several derivatives of artemisinin have been synthesized and studied in China. Artemisinin suppositories, artesunate (oral or parenteral), intramuscular artemether and dihydroartemisinin tablets have all proved rapidly effective. In all, 2352 patients (2150 with Plasmodium falciparum and 202 with P. vivax) have been included in clinical trials from our centre. All preparations have bee…	8053027	Asia	China
Wildling, E.;Jenne, L.;Graninger, W.;Bienzle, U.;Kremsner, P. G.	1994	High dose chloroquine versus micronized halofantrine in chloroquine-resistant Plasmodium falciparum malaria	The Journal of antimicrobial chemotherapy	33	4	871-5		8056708	Africa	Gabon
Looareesuwan, S.;Vanijanonta, S.;Viravan, C.;Wilairatana, P.;Charoenlarp, P.;Andrial, M.	1994	Randomized trial of mefloquine alone and artesunate followed by mefloquine for the treatment of acute uncomplicated falciparum malaria	Annals of tropical medicine and parasitology	88	2	131-6	Mefloquine is the main antimalarial used for treatment of falciparum malaria patients at the malaria clinics in Thailand. However, the cure rate with mefloquine alone has declined seriously in recent years. The efficacy and tolerability of a sequential treatment of artesunate followed by mefloquine was therefore compared with those of mefloquine alone, in a randomized therapeutic trial involving …	8067808	Asia	Thailand
Bouchaud, O.;Basco, L. K.;Gillotin, C.;Gimenez, F.;Ramiliarisoa, O.;Genissel, B.;Bouvet, E.;Farinotti, R.;Le, B. J.;Coulaud, J. P.	1994	Clinical efficacy and pharmacokinetics of micronized halofantrine for the treatment of acute uncomplicated falciparum malaria in nonimmune patients	The American journal of tropical medicine and hygiene	51	2	204-13	Twenty-eight nonimmune patients with acute uncomplicated falciparum malaria returning from subSaharan Africa were treated with a micronized formulation of halofantrine hydrochloride (three doses of 250 mg at 6-hr intervals) to investigate the drug's efficacy, tolerance, and pharmacokinetics. In vitro drug susceptibility patterns were determined by the isotopic semimicrotest. Twenty-four of 28 pat…	8074254	Africa	Travellers
Kremsner, P. G.;Winkler, S.;Brandts, C.;Neifer, S.;Bienzle, U.;Graninger, W.	1994	Clindamycin in combination with chloroquine or quinine is an effective therapy for uncomplicated Plasmodium falciparum malaria in children from Gabon	The Journal of infectious diseases	169	2	467-70	Multidrug resistance of Plasmodium falciparum is becoming common in Africa. In a randomized trial, four short-term regimens were compared for treating uncomplicated P. falciparum malaria in children 4-15 years old in Gabon. One hundred thirty patients received chloroquine (25 mg/kg over 48 h; group C), chloroquine (as above) plus clindamycin (5 mg/kg every 12 h for 6 doses; group CCl), quinine (1…	8106787	Africa	Gabon
Watt, G.;Loesuttiviboon, L.;Jongsakul, K.;Shanks, G. D.;Ohrt, C. K.;Karnasuta, C.;Schuster, B.;Fleckenstein, L.	1994	Efficacy and tolerance of extended-dose halofantrine for drug-resistant falciparum malaria in Thailand	The American journal of tropical medicine and hygiene	50	2	187-92	New treatments for malaria are urgently needed in areas such as Thailand where highly drug-resistant strains of Plasmodium falciparum are prevalent. Mefloquine is rapidly losing efficacy and conventional doses of halofantrine are infective. We therefore used pharmacokinetic stimulation to design an extended-dose halofantrine regimen and tested it in 26 soldiers stationed along the Thai-Cambodian …	8116811	Asia	Thailand
Fontanet, A. L.;Johnston, B. D.;Walker, A. M.;Bergqvist, Y.;Hellgren, U.;Rooney, W.	1994	Falciparum malaria in eastern Thailand: a randomized trial of the efficacy of a single dose of mefloquine	Bulletin of the World Health Organization	72	1	73-8	Reported are the results of a randomized trial of a single dose of mefloquine (15 mg/kg or 25 mg/kg body weight) for the treatment of uncomplicated multidrug-resistant falciparum malaria. Of the 110 adult patients enrolled in the study 57 were randomly assigned to the 15 mg/kg group and 53 to the 25 mg/kg group. The baseline characteristics of the patients did not differ significantly in the two …	8131253	Asia	Thailand
Pukrittayakamee, S.;Vanijanonta, S.;Chantra, A.;Clemens, R.;White, N. J.	1994	Blood stage antimalarial efficacy of primaquine in Plasmodium vivax malaria	The Journal of infectious diseases	169	4	932-5	The blood stage antimalarial efficacy of primaquine (0.25 mg of base/kg of body weight/day over 14 days) and chloroquine (25 mg of base/kg over 3 days) were compared in 85 adult Thai men with acute Plasmodium vivax malaria. Most (75%) had at least one malaria episode previously. Parasite clearance times after primaquine alone (n = 30) were slower than after chloroquine (n = 30) or combined chloro…	8133114	Asia	Thailand
Del, N. L.;Nebie, I.;Soudouem, G.;Pietra, V.	1994	Chloroquine and sulfadoxine/pyrimethamine sensitivity in Burkina Faso. In vivo sensitivity of Plasmodium falciparum to chloroquine and sulfadoxine/pyrimethamine in Burkina Faso	Tropical and geographical medicine	46	1	8-10	Plasmodium falciparum susceptibility to chloroquine and sulfadoxine/pyrimethamine was investigated in children living in an urban district of Ouagadougou, Burkina Faso, in August 1992. A modified WHO Standard Field in vivo test was used, with follow-up on days 2, 4, 7, and 14 after treatment with 25 mg chloroquine per kg body weight given over 3 days, or with standard doses of sulfadoxine/pyrimet…	8165742	Africa	Burkina Faso
Handunnetti SM, Jayasinghe S, Pathirana PP, Fernando R, Sheriff MH, Mendis KN.	1994	Sulphadoxine-pyrimethamine and chloroquine resistant Plasmodium falciparum infection in Sri Lanka.	Ceylon Medical Journal	39	1	45-46		8194148	Asia	Sri Lanka
Pukrittayakamee, S.;Viravan, C.;Charoenlarp, P.;Yeamput, C.;Wilson, R. J.;White, N. J.	1994	Antimalarial effects of rifampin in Plasmodium vivax malaria	Antimicrobial agents and chemotherapy	38	3	511-4	The antimalarial effects of rifampin in 60 adults with Plasmodium vivax malaria were assessed. There were three treatment groups: rifampin (20 and 15 mg/kg of body weight per day for 1 and 4 days, respectively; n = 5); rifampin followed by primaquine (15 mg of base per day for 14 days; n = 25), and chloroquine (25 mg of base per kg over 3 days) followed by primaquine (n = 30). All patients were h…	8203846	Asia	Thailand
Karbwang, J.;Na-Bangchang, K.;Thanavibul, A.;Bunnag, D.;Chongsuphajaisiddhi, T.;Harinasuta, T.	1994	Comparison of oral artesunate and quinine plus tetracycline in acute uncomplicated falciparum malaria	Bulletin of the World Health Organization	72	2	233-8	In Thailand Plasmodium falciparum malaria is highly resistant to available antimalarials. Investigations on the efficacy of existing antimalarials and of alternative drugs are urgently needed. Artesunate has been shown to be effective against falciparum malaria, but is associated with a high recrudescence rate. We have carried out a comparative clinical trial of the standard regimen of quinine + …	8205643	Asia	Thailand
Del, N. L.;Lamizana, L.;Nebie, I.;Sare, S.;Bougouma, L.;Pietra, V.	1994	In vivo sensitivity of Plasmodium falciparum to halofantrine hydrochloride in Burkina Faso	The American journal of tropical medicine and hygiene	50	1	102-6	Plasmodium falciparum susceptibility to halofantrine hydrochloride was investigated in a small village near Ouagadougou, Burkina Faso, where the parasite was known to be chloroquine resistant. An in vivo test was carried out in July 1992 at the beginning of the rainy season in children ranging in age from two to eight years with P. falciparum monospecific infections, asexual parasitemia greater t…	8304564	Africa	Burkina Faso
Afari, E. A.;Dunyo, S.;Appawu, M.;Nkrumah, F. K.	1994	In vivo seasonal assessment of Plasmodium falciparum sensitivity to chloroquine in two different malaria endemic communities in Southern Ghana	African journal of health sciences	1	3	112-115	A two year (1992 to 1993) in vivo assessment of Plasmodium falciparum sensitivity to chloroquine was conducted in two communities at Dodowa (hyperendemic) and Prampram (mesoendemic) in Southern Ghana. A slightly modified World Helath Organization standard field test (7 day test) for response of Plasmodium falciparum asexual parasites to chloroquine was used for the survey. In 1992, 16.2% (12/74) …	12153353	Africa	Ghana
Luxemburger, C.;Nosten, F.;Raimond, S. D.;Chongsuphajaisiddhi, T.;White, N. J.	1995	Oral artesunate in the treatment of uncomplicated hyperparasitemic falciparum malaria	The American journal of tropical medicine and hygiene	53	5	522-5	Patients with uncomplicated hyperparasitemic falciparum malaria are usually given parenteral antimalarial treatment to prevent a progression to vital organ dysfunction and death. Since the oral artemisinin derivatives are more rapidly effective than other antimalarial drugs, we compared oral artesunate (4 mg/kg/day for three days with mefloquine 25 mg/kg on the second day) with an intravenous qui…	7485711	Asia	Thailand
Ringwald, P.;Louis, F. J.;Bickii, J.;Ringwald, C.;Daban, A.;Ravinet, L.	1995	Efficacy and tolerance in adults of a short (3 days) course of quinine for uncomplicated falciparum malaria	Annales de la Societe belge de medecine tropicale	75	2	141-3		7487202	Africa	Cameroon
Nevill, C. G.;Ochen, K.;Munafu, C. G.;Bekobita, D.;Sezi, C. L.	1995	Response of Plasmodium falciparum to chloroquine and Fansidar in vivo and chloroquine and amodiaquine in vitro in Uganda	East African medical journal	72	6	349-54	The response of P. falciparum to chloroquine and pyrimethamine-sulfadoxine in vivo and chloroquine and amodiaquine in vitro was investigated in parasitaemic school children from six locations. Mean parasite sensitivity to chloroquine at day 7 was 74% (range 61-97) with parasite clearance rates between 2-3 days and complete defervescence in 85% of febrile children. Sensitivity declined in the four…	7498001	Africa	Uganda
Adagu, S. I.;Okoyeh, J. N.;Lege-Oguntoye, L.;Ogala, W. N.;Ogunrinde, G. O.;Faji, J. T.;Sani, A. H.	1995	Efficacy of a 3-day oral regimen of quinine in an area of northern Nigeria with low-grade resistance of Plasmodium falciparum to chloroquine and sulphadoxine-pyrimethamine	The Journal of tropical medicine and hygiene	98	5	296-8	The efficacy in vivo of a 3-day oral regimen of quinine (30 mg/kg/day) was assessed in 34 children with falciparum malaria in an area of northern Nigeria with previously documented low-grade parasite resistance to chloroquine and sulphadoxine-pyrimethamine (SDX/PYR). By day 4, all 34 children were free of parasites. Mean parasite clearance time and fever clearance time were 2.7 and 1.7 days, resp…	7563254	Africa	Nigeria
Barennes, H.;Kahiatani, F.;Pussard, E.;Clavier, F.;Meynard, D.;Njifountawouo, S.;Verdier, F.	1995	Intrarectal Quinimax (an association of Cinchona alkaloids) for the treatment of Plasmodium falciparum malaria in children in Niger: efficacy and pharmacokinetics	Transactions of the Royal Society of Tropical Medicine and Hygiene	89	4	418-21	In an attempt to avoid the complications associated with intramuscular quinine administration, we assessed the intrarectal route. Sixty-six children aged from 2 to 10 years with Plasmodium falciparum malaria were included in the study, which took place in Niamey, Niger. Fifty-five children were given 20 mg/kg of the diluted injectable form of Quinimax (a quinine, quinidine, cinchonine, cinchonidi…	7570885	Africa	Niger
Tan-ariya, P.;Na-Bangchang, K.;Tin, T.;Limpaibul, L.;Brockelman, C. R.;Karbwang, J.	1995	Clinical response and susceptibility in vitro of Plasmodium vivax to the standard regimen of chloroquine in Thailand	Transactions of the Royal Society of Tropical Medicine and Hygiene	89	4	426-9	The clinical effectiveness of the standard regimen of chloroquine (CQ) (a total dose of 1500 mg, given over 48 h at 0, 6, 24 and 48 h) for the treatment of Plasmodium vivax malaria in Thailand was investigated in 57 patients in an endemic area of Thailand (Chantaburi Province, eastern Thailand). For radical treatment, an additional course of a tissue schizontocidal agent, primaquine, was given fo…	7570887	Asia	Thailand
Karbwang, J.;Na-Bangchang, K.;Thanavibul, A.;Ditta-in, M.;Harinasuta, T.	1995	A comparative clinical trial of two different regimens of artemether plus mefloquine in multidrug resistant falciparum malaria	Transactions of the Royal Society of Tropical Medicine and Hygiene	89	3	296-8	Plasmodium falciparum in Thailand is highly resistant to available antimalarial drugs. Artemether, a derivative of artemisinin, is a promising compound currently used to cope with this situation but the course of treatment has to be at least 5 d. An effective short treatment course of this drug is possible when used in combination with mefloquine. We now report a trial of different regimens of th…	7660440	Asia	Thailand
Mishra, S. K.;Asthana, O. P.;Mohanty, S.;Patnaik, J. K.;Das, B. S.;Srivastava, J. S.;Satpathy, S. K.;Dash, S.;Rath, P. K.;Varghese, K.	1995	Effectiveness of alpha,beta-arteether in acute falciparum malaria	Transactions of the Royal Society of Tropical Medicine and Hygiene	89	3	299-301	With the emergence of widespread chloroquine resistance and a world-wide scarcity of quinine, a search for newer antimalarial drugs has become imperative. Different derivatives of qinghaosu have been successfully tried. alpha,beta-Arteether, an ethyl derivative of qinghaosu, was administered to 51 patients with Plasmodium falciparum malaria, in a dose of 150 mg intramuscularly once a day on 3 con…	7660441	Asia	India
Sowunmi, A.;Oduola, A. M.	1995	Open comparison of mefloquine, mefloquine/sulfadoxine/pyrimethamine and chloroquine in acute uncomplicated falciparum malaria in children	Transactions of the Royal Society of Tropical Medicine and Hygiene	89	3	303-5	The susceptibility in vivo of Plasmodium falciparum to mefloquine, mefloquine/sulfadoxine/pyrimethamine and chloroquine was investigated in 115 children with acute uncomplicated falciparum malaria. Susceptibility of P. falciparum isolates to mefloquine and chloroquine in vitro was also investigated. Mefloquine alone and mefloquine/sulfadoxine/pyrimethamine showed similar response rates and both r…	7660443	Africa	Nigeria
Soto, J.;Martinez, R.;Fonschiffrey, G.;Dember, J.	1995	Efficacy of Fansidar for acute uncomplicated malaria due to Plasmodium falciparum in Colombia	Transactions of the Royal Society of Tropical Medicine and Hygiene	89	3	306		7660444	S.America	Colombia
Than, Marlar;Myat-Phone-Kyaw;Aye-Yu-Soe;Khaing-Khaing-Gyi;Ma-Sabai;Myint-Oo	1995	Development of resistance to chloroquine by Plasmodium vivax in Myanmar	Transactions of the Royal Society of Tropical Medicine and Hygiene	89	3	307-8	Fifty patients with Plasmodium vivax infection were treated with the standard regimen of chloroquine phosphate (1500 mg over 3 d) followed by primaquine (45 mg immediately and then weekly for 8 weeks); 43 patients had sensitive infections but recrudescences of parasitaemia occurred between days 3 and 14 with RI, RII and RIII patterns in one, 3 and 3 patients, respectively. All the chloroquine-res…	7660445	Asia	Myanmar
Metzger, W.;Mordmuller, B.;Graninger, W.;Bienzle, U.;Kremsner, P. G.	1995	High efficacy of short-term quinine-antibiotic combinations for treating adult malaria patients in an area in which malaria is hyperendemic	Antimicrobial agents and chemotherapy	39	1	245-6	In a randomized trial, a three-dose quinine monotherapy was compared with short-term combination regimens of quinine-clindamycin and quinine-doxycycline for treating adult Gabonese patients with Plasmodium falciparum malaria. In quinine-treated patients, only 38% were ultimately cured. In contrast, more than 90% of patients were cured after treatment with either combination regimen.	7695315	Africa	Gabon
Jelinek, T.;Nothdurft, H. D.;Von, S. F.;Loscher, T.	1995	Long-term efficacy of primaquine in the treatment of vivax malaria in nonimmune travelers	The American journal of tropical medicine and hygiene	52	4	322-4	Fifty-six travelers presenting with vivax malaria to a German travel clinic were followed regularly for at least 18 months between 1984 and 1992 to investigate the long-term efficacy of primaquine in nonimmune patients without reinfection. All received a standard treatment of 15 mg of primaquine a day for 14 days following an initial total dose of 1,500 mg of chloroquine (base) given over a 48-hr…	7741169	Travellers	Travellers
Blom, G. J.;Baboo, K. S.;Athale, U. H.;van, d. W. T. S.	1995	Plasmodium falciparum malaria in vivo drug sensitivity in Lusaka, Zambia	The Central African journal of medicine	41	1	6-10	In most of sub-Saharan African, drug resistant falciparum malaria has become a major health care concern. Drug sensitivity was evaluated in vivo in Lusaka, Zambia, in 71 episodes in 61 patients with uncomplicated falciparum malaria, for Chloroquin (CQ), Pyrimethamine/sulfadoxine (PS) and halofantrine (HF). CQ resistance was found at R2 (16 pc) and R3 (24.5 pc) level in 37 patients, R3 (10.5 pc) r…	7767936	Africa	Zambia
Baird, J. K.;Basri, H.;Subianto, B.;Fryauff, D. J.;McElroy, P. D.;Leksana, B.;Richie, T. L.;Masbar, S.;Wignall, F. S.;Hoffman, S. L.	1995	Treatment of chloroquine-resistant Plasmodium vivax with chloroquine and primaquine or halofantrine	The Journal of infectious diseases	171	6	1678-82	Optimal therapy for infection by chloroquine-resistant Plasmodium vivax has not been established. From 1992 to 1994 during three separate studies, 147 Javanese residents of Irian Jaya infected by P. vivax were treated with either chloroquine (25 mg of base/kg during 3 days or 10 mg of base/kg in one dose) plus primaquine (10 mg/kg during 28 days or 2.5 mg/kg during 3 days) (n = 78), chloroquine p…	7769318	Asia	Indonesia
Bunnag, D.;Kanda, T.;Karbwang, J.;Thimasarn, K.;Pungpak, S.;Harinasuta, T.	1995	Artemether-mefloquine combination in multidrug resistant falciparum malaria	Transactions of the Royal Society of Tropical Medicine and Hygiene	89	2	213-5	Plasmodium falciparum in Thailand is highly resistant to chloroquine and sulfadoxine/pyrimethamine and there is increasing resistance to the alternative antimalarials, quinine and mefloquine. In eastern Thailand, the cure rates of mefloquine at 750 and 1250 mg were 30% and 55%, respectively. The use of drug combinations may be necessary in areas where drug-resistant parasites exist. 159 male Thai…	7778152	Asia	Thailand
Kombila, M.;Dufillot, D.;Duong, T. H.;Milama, E. N.;Rondi, M. L.;Koko, J.;de, B. B.	1995	Treatment of Plasmodium falciparum malaria attacks in children with artemether in Gabon	Sante (Montrouge France)	5	1	19-23	The efficacy and tolerance of artemether administered intramuscularly twice daily (1.6 or 3.2 mg/kg/day) were evaluated in 47 children (mean age 2.4 years old) suffering from mild (n = 28) or severe (n = 19) attacks of Plasmodium falciparum malaria. Tolerance was also investigated in 5 additional children for whom the efficacy could not be assessed, because the parasitaemia was too low on inclusi…	7894825	Africa	Gabon
Chandenier, J.;Ndounga, M.;Carme, B.;Gay, F.;Mbitsi, A.;Hayette, M. P.;Stanghellini, A.;Ossoh, J. O.;Baudon, D.;Zitsamele, R. C.	1995	Drug sensitivity of Plasmodium falciparum in vivo and in vitro in Brazzaville (Congo)	Sante (Montrouge France)	5	1	25-29	Various projects were launched in 1993 to monitor the chemosensitivity of Plasmodium falciparum in Congo. Resistance of 34 strains in Brazzaville to chloroquine, quinine and mefloquine and of 35 to halofantrine was investigated in an in vitro survey using an isotopic micro test. The resistance rates were 61.8, 14.7, 3.0 and 0.0% respectively. Thus, the chemoresistance which first appeared in 1990…	7894826	Africa	Democratic Republic of Congo
Misra, S. P.;Nandi, J.;Lal, S.	1995	Chloroquine versus amodiaquine in the treatment of Plasmodium falciparum malaria in northeast India	The Indian journal of medical research	102		119-23	Amodiaquine is being used in India for presumptive treatment as an alternative to chloroquine in areas with chloroquine resistant P. falciparum. Keeping in view the toxicity of amodiaquine, studies have been undertaken to evaluate the advantage of the drug over chloroquine in the treatment of P. falciparum malaria. In vivo drug resistance studies were carried out in the states of Assam and Meghal…	8543350	Asia	India
Price, R. N.;Nosten, F.;Luxemburger, C.;Kham, A.;Brockman, A.;Chongsuphajaisiddhi, T.;White, N. J.	1995	Artesunate versus artemether in combination with mefloquine for the treatment of multidrug-resistant falciparum malaria	Transactions of the Royal Society of Tropical Medicine and Hygiene	89	5	523-7	To compare the therapeutic efficacy of oral artesunate and artemether in combination with mefloquine for the treatment of multidrug resistant malaria, a trial was conducted in 540 adults and children on the Thai-Myanmar border. Three regimens were compared: artesunate (4 mg/kg/d for 3 d), artemether (4 mg/kg/d for 3 d), both in combination with mefloquine (25 mg/kg), and a single dose of mefloqui…	8560531	Asia	Thailand
Brasseur, P.;Agnamey, P.;Ekobo, A. S.;Samba, G.;Favennec, L.;Kouamouo, J.	1995	Sensitivity of Plasmodium falciparum to amodiaquine and chloroquine in central Africa: a comparative study in vivo and in vitro	Transactions of the Royal Society of Tropical Medicine and Hygiene	89	5	528-30	A comparative study in vivo of amodiaquine efficacy (35 mg/kg over 3 d) and chloroquine (25 mg/kg over 3 d) was conducted in 1991 and 1992 in Cameroon and Congo in 123 patients with uncomplicated Plasmodium falciparum malaria. Amodiaquine was more effective than chloroquine, with parasite clearance by day 7 in 79.7% of the patients compared with 59.4%. Sixteen of 32 (50%) P. falciparum isolates t…	8560532	Africa	Multicentred
Alin, M. H.;Kihamia, C. M.;Bjorkman, A.;Bwijo, B. A.;Premji, Z.;Mtey, G. J.;Ashton, M.	1995	Efficacy of oral and intravenous artesunate in male Tanzanian adults with Plasmodium falciparum malaria and in vitro susceptibility to artemisinin, chloroquine, and mefloquine	The American journal of tropical medicine and hygiene	53	6	639-45	The clinical efficacy of oral and intravenous (iv) artesunate was compared in an open randomized trial in 50 male adult patients with uncomplicated Plasmodium falciparum malaria in Kibaha, Tanzania. Oral artesunate treatment was started with 2 x 50 mg initially followed by 50 mg 12 hr later and then 50 mg twice a day for four days (total dose = 550 mg or 9.6 mg/kg). Intravenous artesunate adminis…	8561267	Africa	Tanzania
Metzger, W.;Mordmuller, B.;Graninger, W.;Bienzle, U.;Kremsner, P. G.	1995	Sulfadoxine/pyrimethamine or chloroquine/clindamycin treatment of Gabonese school children infected with chloroquine resistant malaria	The Journal of antimicrobial chemotherapy	36	4	723-8	In a randomized trial, a high dosage chloroquine monotherapy (45 mg/kg over 3 days) was compared with combination regimens of sulfadoxine/pyrimethamine and chloroquine/clindamycin for treating Gabonese school children with Plasmodium falciparum malaria. In chloroquine treated patients only 32% were ultimately cured. In contrast, more than 90% of patients were cured after treatment with either com…	8591949	Africa	Gabon
Wolday, D.;Kibreab, T.;Bukenya, D.;Hodes, R.	1995	Sensitivity of Plasmodium falciparum in vivo to chloroquine and pyrimethamine-sulfadoxine in Rwandan patients in a refugee camp in Zaire	Transactions of the Royal Society of Tropical Medicine and Hygiene	89	6	654-6	Resistance of Plasmodium falciparum to available antimalarial drugs is now thought to be spreading progressively throughout sub-Sahara Africa. In this study we measured the susceptibility of P. falciparum to chloroquine and pyrimethamine-sulfadoxine in vivo in Rwandan patients living in Kibumba refugee camp in Goma, Zaire. Of the 39 cases treated with chloroquine, only 8 (20.5%) showed sensitive …	8594686	Africa	Democratic Republic of Congo
Thimasarn, K.;Sirichaisinthop, J.;Vijaykadga, S.;Tansophalaks, S.;Yamokgul, P.;Laomiphol, A.;Palananth, C.;Thamewat, U.;Thaithong, S.;Rooney, W.	1995	In vivo study of the response of Plasmodium falciparum to standard mefloquine/sulfadoxine/pyrimethamine (MSP) treatment among gem miners returning from Cambodia	The Southeast Asian journal of tropical medicine and public health	26	2	204-12	An in vivo study of the response of P. falciparum to the combination drug, MSP, was conducted among gem miners who contracted malaria from Cambodia in 1991-1992. High level resistance (RII, RIII responses) was observed in 22.5% of the 40 cases attending Mae Sot malaria clinic, west Thailand border, and in 28.1% of the 96 cases attending Bo Rai malaria clinic, east Thailand border. The observation…	8629047	Asia	Thailand
Agnamey, P. P.;Leroy, G.;Kouamouo, J.;Brasseur, P.	1995	Sensitivity in vivo and in vitro of Plasmodium falciparum to chloroquine and amodiaquine in Bangangte (west Cameroon)	Bulletin de la Societe de pathologie exotique	88	4	149-51	A cross-sectional malaria survey was conducted during the rainy season in Bangangte (West-Cameroon), a town of 90,000 inhabitants located in the high tablelands zone of Cameroon. An in vivo study revealed that 50% of P. falciparum malaria patients were resistant to chloroquine (25 mg/kg over 3 days) and 26.3% to amodiaquine (35 mg/kg over 3 days) at a RII/RIII level. In addition, plasmodial indic…	8640075	Africa	Cameroon
Barennes, H.;Kahiatani, D.;Clavier, F.;Meynard, D.;Njifountawaouo, S.;Barennes-Rasoanandrasana, F.;Amadou, M.;Soumana, M.;Mahamansani, A.;Granic, G.;et al.	1995	Rectal quinine, an alternative to parenteral injections for the treatment of childhood malaria. Clinical, parasitological and pharmacological study	Medecine tropicale : revue du Corps de sante colonial	55	4 Suppl	91-4	In order to avoid the frequent side effects with injections of quinine in african children, empirical intrarectal administration of quinine (Quinimax, Sanofi Winthrop) has already been used successfully in Madagascar and Niger. In an attempt to optimise its use, a pharmacokinetic study was carried out with 66 children, 2 to 15 years old, admitted in pediatric unit for acute uncomplicated Plasmodi…	8649278	Africa	Multicentred
Mbori-Ngacha, D. A.;Onyango, F. E.;Chunge, C.;Luta, M.;Oloo, A. J.;Muga, R. O.	1995	Efficacy of halofantrine in the treatment of uncomplicated falciparum malaria	East African medical journal	72	12	796-9	In the last decade, Plasmodium falciparum resistance to a number of commonly used anti-malarials especially chloroquine, has increased considerably. Newer anti-malarial drugs are therefore being aggressively evaluated as alternatives. A randomized double-blind controlled trial was therefore undertaken, to compare the efficacy of halofantrine to that of metakelfin, in the treatment of moderately s…	8689980	Africa	Kenya
Chiodini, P. L.;Conlon, C. P.;Hutchinson, D. B.;Farquhar, J. A.;Hall, A. P.;Peto, T. E.;Birley, H.;Warrell, D. A.	1995	Evaluation of atovaquone in the treatment of patients with uncomplicated Plasmodium falciparum malaria	The Journal of antimicrobial chemotherapy	36	6	1073-8	The activity of atovaquone in patients with oligosymptomatic Plasmodium falciparum malaria was assessed in an open, non-comparative clinical study. The patients showed a good clinical response, but there was a high rate of recrudescence. The activity of atovaquone in combination with another antimalarial agent should be investigated.	8821609	Travellers	Travellers
Karbwang, J.;Na-Bangchang, K.;Thanavibul, A.;Laothavorn, P.;Ditta-in, M.;Harinasuta, T.	1995	A comparative clinical trial of artemether and the sequential regimen of artemether-mefloquine in multidrug resistant falciparum malaria	The Journal of antimicrobial chemotherapy	36	6	1079-83	A randomized, comparative clinical trial for assessment of the efficacy of two antimalarial regimens, artemether alone and the sequential regimen artemethermefloquine, was carried out in 109 Thai male patients with acute uncomplicated, multidrug resistant falciparum malaria who were admitted to the Bangkok Hospital for Tropical Diseases. Fifty-three patients received oral artemether at a total do…	8821610	Asia	Thailand
Potkar, C. N.;Kshirsagar, N. A.;Kathuria, R.	1995	Resurgence of malaria and drug resistance in plasmodium falciparum and plasmodium vivax species in Bombay	The Journal of the Association of Physicians of India	43	5	336-8	Malaria had been well controlled in Bombay, through control of mosquito breeding sites and legal provisions. However in the past 2-3 years there has been a marked increase in incidence of malaria in Bombay. The objective of the present study was to assess the incidence of drug resistance of malarial parasite to standard drugs. The study was an outpatient study, but drug administration was supervi…	9081964	Asia	India
Ringwald, P.;Bickii, J.;Basco, L.	1996	Randomised trial of pyronaridine versus chloroquine for acute uncomplicated falciparum malaria in Africa	Lancet	347	8993	24-28	BACKGROUND: The spread of chloroquine resistance poses a serious problem in Africa, where falciparum malaria transmission is the highest in the world. Pyronaridine, an acridine derivative, has been used successfully to treat malaria in China for over 20 years. We compared the efficacy of pyronaridine and chloroquine in African adult patients with acute uncomplicated falciparum malaria in Yaounde,…	8531545	Africa	Cameroon
Duarte, E. C.;Fontes, C. J.;Gyorkos, T. W.;Abrahamowicz, M.	1996	Randomized controlled trial of artesunate plus tetracycline versus standard treatment (quinine plus tetracycline) for uncomplicated Plasmodium falciparum malaria in Brazil	The American journal of tropical medicine and hygiene	54	2	197-202	A triple-blind, randomized, clinical trial was undertaken in a Brazilian Amazon region to compare the effectiveness of oral artesunate (seven days, total dose = 0.75 g) plus tetracycline (seven days, total dose = 10.5 g) (AT) and oral quinine (three days, total dose = 6 g) plus tetracycline (seven days, total dose = 10.5 g) (QT) against uncomplicated Plasmodium falciparum malaria. Effectiveness w…	8619447	S.America	Brazil
Looareesuwan, S.;Kyle, D. E.;Viravan, C.;Vanijanonta, S.;Wilairatana, P.;Wernsdorfer, W. H.	1996	Clinical study of pyronaridine for the treatment of acute uncomplicated falciparum malaria in Thailand	The American journal of tropical medicine and hygiene	54	2	205-9	One hundred one adult patients with acute uncomplicated falciparum malaria were treated with pyronaridine. All patients were admitted to the Bangkok Hospital for Tropical Diseases for 28 days to exclude reinfection. Sixty-nine patients (Group I) received pyronaridine 1,200 mg over a three-day period and 32 patients (Group II) received 1,800 mg pyronaridine over a five-day period. Cure rates for t…	8619449	Asia	Thailand
Looareesuwan, S.;Viravan, C.;Vanijanonta, S.;Wilairatana, P.;Pitisuttithum, P.;Andrial, M.	1996	Comparative clinical trial of artesunate followed by mefloquine in the treatment of acute uncomplicated falciparum malaria: two- and three-day regimens	The American journal of tropical medicine and hygiene	54	2	210-3	The difficulties in treating drug-resistant falciparum malaria in Thailand are compounded by the necessity of giving antimalarials over long periods of time. The resultant decrease in patient compliance not only lowers cure rates but also predisposes to the further spread of drug resistance. We compared the efficacy of two sequential treatment regimens given over two and three days in 111 patient…	8619450	Asia	Thailand
Looareesuwan, S.;Viravan, C.;Webster, H. K.;Kyle, D. E.;Hutchinson, D. B.;Canfield, C. J.	1996	Clinical studies of atovaquone, alone or in combination with other antimalarial drugs, for treatment of acute uncomplicated malaria in Thailand	The American journal of tropical medicine and hygiene	54	1	62-6	The therapy of Plasmodium falciparum malaria continues to be a problem in many parts of Southeast Asia because of multidrug resistance to nearly all existing antimalarial drugs. Atovaquone is a novel hydroxynaphthoquinone with broad spectrum anti-protozoal activity. We recently evaluated the antimalarial activity of atovaquone in a series of dose-ranging studies in 317 patients with malaria at th…	8651372	Asia	Thailand
Nwanyanwu, O. C.;Ziba, C.;Kazembe, P.;Chitsulo, L.;Wirima, J. J.;Kumwenda, N.;Redd, S. C.	1996	Efficacy of sulphadoxine/pyrimethamine for Plasmodium falciparum malaria in Malawian children under five years of age	Tropical medicine & international health	1	2	231-5	In March 1993, sulphadoxine/pyrimethamine (SP) replaced chloroquine as the first line drug for malaria treatment in Malawi. Since then, the Ministry of Health has been receiving anecdotal and written reports of SP treatment failures in children. To determine whether treatment failure with SP was a widespread problem, children < 5 years of age with axillary temperature > 38.0 degrees C and parasit…	8665390	Africa	Malawi
Muller, O.;van, H. M. B.;Jaffar, S.;Drakeley, C.;Okorie, C.;Joof, D.;Pinder, M.;Greenwood, B.	1996	A randomized trial of chloroquine, amodiaquine and pyrimethamine-sulphadoxine in Gambian children with uncomplicated malaria	Tropical medicine & international health	1	1	124-32	The increasing occurrence of chloroquine-resistant Plasmodium falciparum in sub-Saharan Africa makes it essential to reconsider current recommendations for the treatment of uncomplicated P.falciparum malaria. In an open, randomized trial, we have compared chloroquine (CQ), amodiaquine (AQ), and pyrimethamine-sulphadoxine (PS) in rural Gambian children with uncomplicated P.falciparum malaria. Thre…	8673817	Africa	Gambia
Radloff, P. D.;Philipps, J.;Nkeyi, M.;Hutchinson, D.;Kremsner, P. G.	1996	Atovaquone and proguanil for Plasmodium falciparum malaria	Lancet	347	9014	1511-4	BACKGROUND: The increasing spread of multidrug-resistant Plasmodium falciparum malaria emphasises the urgent need for alternative treatment regimens. The objective of the study was to establish the efficacy of a novel drug combination. We compared a combination of atovaquone and proguanil with amodiaquine in the treatment of acute uncomplicated P falciparum malaria in Lambarene, Gabon. METHODS: 1…	8684102	Africa	Gabon
Anabwani, G. M.;Esamai, F. O.;Menya, D. A.	1996	A randomised controlled trial to assess the relative efficacy of chloroquine, amodiaquine, halofantrine and Fansidar in the treatment of uncomplicated malaria in children	East African medical journal	73	3	155-8	A randomised controlled trial was carried out to determine the relative efficacy of four commonly used antimalarial drugs in children aged three to twelve years presenting with uncomplicated malaria at the Eldoret District Hospital, Kenya. One hundred and eighty eight children were studied between July 1993 and July 1994. There were no significant baseline differences between treatment groups wit…	8698011	Africa	Kenya
Cardoso, B. S.;Dourado, H. V.;Pinheiro, M. C.;Crescente, J. A.;Amoras, W. W.;Baena, J.;Saraty, S.	1996	An efficacy and tolerance study of oral artesunate alone and in combination with mefloquine in the treatment of uncomplicated falciparum malaria in an endemic area of Para, Brazil	Revista da Sociedade Brasileira de Medicina Tropical	29	3	251-7	With the objective to evaluate the efficacy and tolerance of artesunate in the treatment of noncomplicated falciparum malaria in endemic area of the State of Para, 153 patients were randomized and studied in three groups, distributed by therapeutical scheme (I received mefloquine 1000 mg, II used artesunate 600 mg followed by mefloquine 500 mg). Evaluation was made by daily clinical and parasitol…	8701045	S.America	Brazil
Steketee, R. W.;Wirima, J. J.;Slutsker, L.;Roberts, J. M.;Khoromana, C. O.;Heymann, D. L.;Breman, J. G.	1996	Malaria parasite infection during pregnancy and at delivery in mother, placenta, and newborn: efficacy of chloroquine and mefloquine in rural Malawi	The American journal of tropical medicine and hygiene	55	1 Suppl	24-32	Despite international recommendations to use malaria treatment and prevention in pregnant women in malaria-endemic areas, few studies have evaluated the efficacy of available antimalarial regimens. This issue is of particular concern in the face of spreading chloroquine (CQ)-resistance of Plasmodium falciparum in malarious areas of sub-Saharan Africa. In a prospective trial in rural Malawian preg…	8702034	Africa	Malawi
Looareesuwan, S.;Wilairatana, P.;Vanijanonta, S.;Pitisuttithum, P.;Viravan, C.;Kraisintu, K.	1996	Treatment of acute, uncomplicated, falciparum malaria with oral dihydroartemisinin	Annals of tropical medicine and parasitology	90	1	21-28	A clinical trial of oral dihydroartemisinin for the treatment of acute, uncomplicated, falciparum malaria involved 53 adult patients in Thailand. Each received a total dose of 480 mg over 7 days (120 mg given immediately, followed by 60 mg/day) after being admitted to the Hospital for Tropical Diseases in Bangkok for 28 days. Most (92%) completed the 28-day follow-up but four patients left the ho…	8729624	Asia	Thailand
Hassan, A. M.;Ashton, M.;Kihamia, C. M.;Mtey, G. J.;Bjorkman, A.	1996	Multiple dose pharmacokinetics of oral artemisinin and comparison of its efficacy with that of oral artesunate in falciparum malaria patients	Transactions of the Royal Society of Tropical Medicine and Hygiene	90	1	61-5	The study compared the clinical efficacy and safety of oral artemisinin and oral artesunate as well as artemisinin pharmacokinetics during and after resolution of falciparum malaria. Forty adults with symptomatic falciparum malaria were allocated at random to treatment with either oral artemisinin (500 mg single dose on day 1 followed by 250 mg twice daily for 4 d and then another 500 mg single d…	8730315	Africa	Tanzania
Barennes, H.;Pussard, E.;Mahaman, S. A.;Clavier, F.;Kahiatani, F.;Granic, G.;Henzel, D.;Ravinet, L.;Verdier, F.	1996	Efficacy and pharmacokinetics of a new intrarectal quinine formulation in children with Plasmodium falciparum malaria	British journal of clinical pharmacology	41	5	389-95	1. Three groups of seven children aged 2-14 years with acute uncomplicated Plasmodium falciparum malaria received 12.8 mg kg-1 quinine gluconate by the intrarectal route (new cream formulation) or 8 mg kg-1 Quinimax (a Cinchona alkaloid alkaloid combination) by the intramuscular or intravenous (4 h infusion) route every 8 h for 3 days. Clinical and parasitological status was similar in the three …	8735679	Africa	Niger
Lokman, H. S.;Sharifah, R. S. W.;Zurkurnai, Y.;Noor, R. A.;Mansor, S. M.;Palmer, K.;Navaratnam, V.;Mak, J. W.	1996	Plasmodium falciparum: increased proportion of severe resistance (RII and RIII) to chloroquine and high rate of resistance to sulfadoxine-pyrimethamine in Peninsular Malaysia after two decades	Transactions of the Royal Society of Tropical Medicine and Hygiene	90	3	294-7	Uncomplicated falciparum malaria patients were randomly assigned to receive either 25 mg/kg chloroquine (CHL) over 3 d or a statim dose of 25 mg/kg sulfadoxine (SDX) plus 1.25 mg/kg pyrimethamine (PYR). Patients were followed up for 28 d and the parasite response graded according to World Health Organization criteria. Overall resistance to CHL was 63.3% and 47.4% to SDX/PYR. RI, RII and RIII rate…	8758083	Asia	Malaysia
Clarke, D.;Odialla, H.;Ouma, J.;Kenny, V.;MacCabe, R.;Rapuoda, B.;Watkins, W. M.	1996	A malariometric survey in Turkana District, Kenya: chemosensitivity in vivo of Plasmodium falciparum infections and identity of the vector	Transactions of the Royal Society of Tropical Medicine and Hygiene	90	3	302-4	We have carried out a limited survey in vivo of the efficacy of chloroquine (n = 39) and pyrimethamine-sulfadoxine (n = 29) as treatments for falciparum malaria in Kaling, Turkana District, northern Kenya. Both treatments were effective, achieving clinical cure (> 75% reduction in parasitaemia on day 2 with clinical improvement, and negative blood slide on day 7) in both children and adults. A li…	8758085	Africa	Kenya
Onyiorah, E.;van, H. M. B.;Jah, M. S.;Greenwood, B.	1996	Early clinical failures after pyrimethamine-sulfadoxine treatment of uncomplicated falciparum malaria	Transactions of the Royal Society of Tropical Medicine and Hygiene	90	3	307-8		8758087	Africa	Gambia
Okeyeh, J. N.;Lege-Oguntoye, L.;Emembolu, J. O.;Agbo, M.	1996	Malaria in pregnancy: efficacy of a low dose of mefloquine in an area holoendemic for multi-drug resistant Plasmodium falciparum	Annals of tropical medicine and parasitology	90	3	265-8	Thirty-three pregnant women with pure P. falciparum parasitaemias (> or = 10(3) parasites/microliters blood), were each treated with a single, oral dose (12.5 mg/kg body weight) of mefloquine base (MQ), at Ahmadu Bello University Teaching Hospital, Zaria urban area, Nigeria. All 33 women were aparasitaemic by day 6 post-treatment and none became parasitaemic during the remaining 21 days of observ…	8758140	Africa	Nigeria
Vanijanonta, S.;Chantra, A.;Phophak, N.;Chindanond, D.;Clemens, R.;Pukrittayakamee, S.	1996	Therapeutic effects of chloroquine in combination with quinine in uncomplicated falciparum malaria	Annals of tropical medicine and parasitology	90	3	269-75	The efficacy and toxicity of oral quinine combined with oral chloroquine were studied in 50 Thai men with uncomplicated falciparum malaria. All were treated for 7 days with quinine sulphate (10 mg salt/kg every 8 h). Twenty-five of the patients, selected at random, were also given oral tetracycline (4 mg/kg four times daily) over the same period and the remainder were given chloroquine (25 mg bas…	8758141	Asia	Thailand
Rogier, C.;Brau, R.;Tall, A.;Cisse, B.;Trape, J. F.	1996	Reducing the oral quinine-quinidine-cinchonin (Quinimax) treatment of uncomplicated malaria to three days does not increase the recurrence of attacks among children living in a highly endemic area of Senegal	Transactions of the Royal Society of Tropical Medicine and Hygiene	90	2	175-8	A 3 d shortened course of the quinine-quinidine-cinchonin association Quinimax was compared to the usual 7 d regimen for routinely treating 462 acute uncomplicated Plasmodium falciparum malaria attacks in 72 children under the age of 10 years in Dielmo, a holoendemic village in Senegal. 25 mg/kg Quinimax salt daily, given in 3 equal doses, improved clinical status in 99.6% of the patients receivi…	8761582	Africa	Senegal
Ronn, A. M.;Msangeni, H. A.;Mhina, J.;Wernsdorfer, W. H.;Bygbjerg, I. C.	1996	High level of resistance of Plasmodium falciparum to sulfadoxine-pyrimethamine in children in Tanzania	Transactions of the Royal Society of Tropical Medicine and Hygiene	90	2	179-81	In many areas of tropical Africa affected by chloroquine-resistant Plasmodium falciparum, a combination of sulfadoxine and pyrimethamine (S-P) is used for alternative medication, especially in young children. In Magoda village in Muheza District, north-eastern Tanzania, 38 children 1-10 years of age were enrolled in a therapeutic study of S-P in July 1994. All had monoinfections of P. falciparum …	8761583	Africa	Tanzania
Sowunmi, A.;Oduola, A. M.;Ilesanmi, A. O.;Salako, L. A.	1996	Open comparison of artemether and mefloquine in uncomplicated Plasmodium falciparum hyperparasitaemia in children	Annals of tropical paediatrics	16	1	5-9	The efficacy of intramuscular artemether given for 5 days and a single oral dose of mefloquine, 25 mg/kg/body-weight, was evaluated in 84 children with uncomplicated Plasmodium falciparum hyperparasitaemia ( > 5% parasitized erythrocytes). Follow-up was for 14 days in the artemether group and 28 days in the mefloquine group. Artemether produced a significantly higher parasite reduction at 24 hour…	8787366	Africa	Nigeria
Ezedinachi, E.	1996	In vivo efficacy of chloroquine, halofantrine, pyrimethamine-sulfadoxine and qinghaosu (artesunate) in the treatment of malaria in Calabar, Nigeria	The Central African journal of medicine	42	4	109-11	We used the WHO in vivo seven day test, extended to 14 day follow up to evaluate the efficacy of the alternative antimalarial drugs in Nigeria (1992), where chloroquine resistant P. falciparum (CRPD) has been confirmed. One thousand and four patients were screened. Those fulfilling recruitment criteria were randomly treated with chloroquine (CQ), n = 50, halofantrine (H), n = 53, pyrimethamine-su…	8791866	Africa	Nigeria
Mahomva, A. I.;Peterson, D. E.;Rakata, L.	1996	Chloroquine resistant falciparum malaria in Mutare District, eastern Zimbabwe	The Central African journal of medicine	42	4	112-3	OBJECTIVE: From 1992 to 1994 malaria incidence and mortality increased in Manicaland province despite an intensified malaria control programme. This was perhaps due to chloroquine resistance. The magnitude of chloroquine resistance in unstable malaria transmission areas of Zimbabwe is unknown. DESIGN: A modified seven day prospective World Health Organization in vivo test for chloroquine resistan…	8791867	Africa	Zimbabwe
Rukaria-Kaumbutho, R. M.;Ojwang, S. B.;Oyieke, J. B.	1996	Resistance to chloroquine therapy in pregnant women with malaria parasitemia	International Journal of Gynaecology and Obstetrics	53	3	235-41	OBJECTIVES:The objective of the study was to determine the efficacy of chloroquine in pregnant women with Plasmodium falciparum parasitemia at therapeutic doses of 25 mg/kg body weight divided over 3 days.METHODS:Three-hundred pregnant women in Kilifi Hospital at the coast of Kenya were screened for malaria parasitemia using Giemsa stained thick blood smears. In vivo and in vitro parasite sensiti…	8793625	Africa	Kenya
Alin, M. H.;Ashton, M.;Kihamia, C. M.;Mtey, G. J.;Bjorkman, A.	1996	Clinical efficacy and pharmacokinetics of artemisinin monotherapy and in combination with mefloquine in patients with falciparum malaria	British journal of clinical pharmacology	41	6	587-92	1. The aim of this study was to assess the pharmacokinetics, clinical efficacy and safety of artemisinin alone and in combination with mefloquine. 2. Thirty-eight adults with symptomatic Plasmodium falciparum malaria were randomly assigned to receive either artemisinin (500 mg single dose followed by another 500 mg on day 1 and then 250 mg twice daily for 4 days) or artemisinin (500 mg single dos…	8799526	Africa	Tanzania
Radloff, P. D.;Philipps, J.;Nkeyi, M.;Sturchler, D.;Mittelholzer, M. L.;Kremsner, P. G.	1996	Arteflene compared with mefloquine for treating Plasmodium falciparum malaria in children	The American journal of tropical medicine and hygiene	55	3	259-62	Arteflene is a synthetic peroxide recently developed from an indication of antimalarial activity found in the Chinese plant Artabotrys uncinatus. The new antimalarial was compared against mefloquine in a phase 3, open-labeled, randomized trial in children with uncomplicated Plasmodium falciparum malaria in Gabon. Patients received single oral doses of either 25 mg/kg of arteflene suspension or 15…	8842111	Africa	Gabon
Baird, J. K.;Sustriayu, N. M. F.;Basri, H.;Masbar, S.;Leksana, B.;Tjitra, E.;Dewi, R. M.;Khairani, M.;Wignall, F. S.	1996	Survey of resistance to chloroquine by Plasmodium vivax in Indonesia	Transactions of the Royal Society of Tropical Medicine and Hygiene	90	4	409-11	In February 1995 we surveyed to chloroquine among patients with Plasmodium vivax malaria at Nias Island, in the Indian Ocean near north-western Sumatra, Indonesa. The subjects, 21 indigenous males and females (6-50 years old) infected with > 40 asexual blood stage parasites of P. vivax per microliter of blood, had mild symptoms or none at all. Seven of these patients had > 100 ng/mL whole blood c…	8882190	Asia	Indonesia
Baird, J. K.;Sismadi, P.;Masbar, S.;Leksana, B.;Sekartuti;Ramzan, A.;Tjitra, E.	1996	Chloroquine sensitive Plasmodium falciparum and P. vivax in central Java, Indonesia	Transactions of the Royal Society of Tropical Medicine and Hygiene	90	4	412-3		8882191	Asia	Indonesia
Baird, J. K.;Caneta-Miguel, E.;Masbar, S.;Bustos, D. G.;Abrenica, J. A.;Layawen, A. V.;Calulut, J. M.;Leksana, B.;Wignall, F. S.	1996	Survey of resistance to chloroquine of falciparum and vivax malaria in Palawan, The Philippines	Transactions of the Royal Society of Tropical Medicine and Hygiene	90	4	413-4		8882192	Asia	Philippines
Bunnag, D.;Kanda, T.;Karbwang, J.;Thimasarn, K.;Pungpak, S.;Harinasuta, T.	1996	Artemether or artesunate followed by mefloquine as a possible treatment for multidrug resistant falciparum malaria	Transactions of the Royal Society of Tropical Medicine and Hygiene	90	4	415-7	Plasmodium falciparum in south-east Asia is highly resistant to chloroquine and sulfadoxine-pyrimethamine. Mefloquine used to be the chemosuppressant drug of choice in areas with chloroquine resistance. However, sensitivity to this drug has recently decreased in Thailand, Cambodia and Myanmar, and there is no suitable single alternative drug. We therefore investigated possible alternative combina…	8882193	Asia	Thailand
Henry, M. C.;Eggelte, T. A.;Watson, P.;Docters, v. L. B.;Bakker, D. A.;Kluin, J.	1996	Response of childhood malaria to chloroquine and Fansidar in an area of intermediate chloroquine resistance in Cote d'Ivoire	Tropical medicine & international health	1	5	610-5	The parasitological, clinical and haematological responses to chloroquine treatment were studied in children during a 28-day follow-up in an area of Cote d'Ivoire with intermediate chloroquine resistance. The parasitological, clinical and haematological responses to Fansidar were also investigated in patients who returned to the health centre within 28 days with symptoms of malaria. Of 82 childre…	8911445	Africa	Cote d'Ivoire
Ramsay, A. R.;Msaki, E. P.;Kennedy, N.;Ngowi, F. I.;Gillespie, S. H.	1996	Evaluation of the safety and efficacy of micronized halofantrine in the treatment of semi-immune patients with acute, Plasmodium falciparum malaria	Annals of tropical medicine and parasitology	90	5	461-6	The efficacy of the standard formulation of halofantrine hydrochloride has been compromised by the formulation's irregular bio-availability. A micronized preparation of the drug has now been evaluated in the treatment of malaria in northern Tanzania. Overall, 100 patients with mild to moderate Plasmodium falciparum malaria were recruited and treated with the preparation over 18 h. Those weighing …	8915121	Africa	Tanzania
Bich, N. N.;De, V. P. J.;Van, T. H.;Phong, T. H.;Hung, L. N.;Eggelte, T. A.;Anh, T. K.;Kager, P. A.	1996	Efficacy and tolerance of artemisinin in short combination regimens for the treatment of uncomplicated falciparum malaria	The American journal of tropical medicine and hygiene	55	4	438-43	Two oral regimens comprising a single dose of 20 mg/kg of artemisinin followed by three days of quinine, 10 mg/kg three times a day (AQ), or doxycycline, 4 mg/kg once a day (AD), were compared with a standard seven-day course of oral quinine, 10 mg/kg three times a day (Q), in the treatment of uncomplicated falciparum malaria. Of 161 treated patients, 157 could be included in the analysis. The me…	8916803	Asia	Vietnam
Tulu, A. N.;Webber, R. H.;Schellenberg, J. A.;Bradley, D. J.	1996	Failure of chloroquine treatment for malaria in the highlands of Ethiopia	Transactions of the Royal Society of Tropical Medicine and Hygiene	90	5	556-7		8944273	Africa	Ethiopia
Handunnetti SM, Gunewardena DM, Pathirana PP, Ekanayake K, Weerasinghe S, Mendis KN.	1996	Features of recrudescent chloroquine-resistant Plasmodium falciparum infections confer a survival advantage on parasites and have implications for disease control.	Transactions of the Royal Society of Tropical Medicine and Hygiene	90	5	563-567	This paper reports on the features of recrudescent infections of chloroquine-resistant Plasmodium falciparum (CQRPf) malaria from a study in vivo of patients from a malaria endemic (n = 527) and non-endemic (n = 129) region of Sri Lanka where the incidence of RI resistance was 30% and 55%, respectively. In both groups of patients, the recrudescent infections which emerged after treatment of the p…	8944275	Asia	Sri Lanka
Mohapatra, P. K.;Khan, A. M.;Prakash, A.;Mahanta, J.;Srivastava, V. K.	1996	Effect of arteether alpha/beta on uncomplicated falciparum malaria cases in Upper Assam	The Indian journal of medical research	104		284-7	Thirty patients of uncomplicated Plasmodium falciparum malaria completed a clinical trial of arteether alpha/beta conducted in a malaria endemic tea garden of district Dibrugarh, Assam. Arteether was given intramuscularly in once a day dose of 150 mg for three consecutive days. The cure rate was 100 per cent with mean fever and parasite clearance time of 42.4 +/- 17.5 and 37.6 +/- 13.6 h respecti…	8979518	Asia	India
Mshinda, H.;Font, F.;Hirt, R.;Mashaka, M.;Ascaso, C.;Menendez, C.	1996	A comparative study of the efficacies of chloroquine and a pyrimethamine-dapsone combination in clearing Plasmodium falciparum parasitaemia in school children in Tanzania	Tropical medicine & international health	1	6	797-801	A randomized study on the in vivo efficacies of chloroquine and a pyrimethamine-dapsone combination (Maloprim) in clearing P. falciparum parasitaemia was carried out in 77 asymptomatic semi-immune schoolchildren in the Kilombero District of Tanzania. Children were randomized to receive either chloroquine at a dose of 25 mg/kg over three days, or Maloprim (6.25 mg pyrimethamine + 50 mg dapsone for…	8980592	Africa	Tanzania
Luxemburger, C.;Price, R. N.;Nosten, F.;Ter, K. F. O.;Chongsuphajaisiddhi, T.;White, N. J.	1996	Mefloquine in infants and young children	Annals of tropical paediatrics	16	4	281-6	In an area where multi-drug resistance in Plasmodium falciparum is a particular problem, more than 500 children under 5 years of age weighing > 5 kg were treated with mefloquine, either alone or combined with an artemisinin derivative, and followed up for a minimum of 28 days. The principal adverse effect was vomiting and this was associated with reduced efficacy of treatment (even when treatment…	8985524	Asia	Thailand
Bunnag, D.;Karbwang, J.;Na-Bangchang, K.;Thanavibul, A.;Chittamas, S.;Harinasuta, T.	1996	Quinine-tetracycline for multidrug resistant falciparum malaria	The Southeast Asian journal of tropical medicine and public health	27	1	15-18	Plasmodium falciparum in Southeast Asia is highly resistant to chloroquine and sulfadoxine/ pyrimethamine. Quinine-tetracycline has been used as a second line treatment for uncomplicated falciparum malaria, but duration of treatment varies from place to place. The 7-days course of this combination has been shown to be very effective. However, due to the cinchonism adverse effects, the patient com…	9031393	Asia	Thailand
Na-Bangchang, K.;Tipwangso, P.;Thanavibul, A.;Tan-ariya, P.;Suprakob, K.;Kanda, T.;Karbwang, J.	1996	Artemether-pyrimethamine in the treatment of pyrimethamine-resistant falciparum malaria	The Southeast Asian journal of tropical medicine and public health	27	1	19-23	In vitro susceptibility and clinical response of multidrug resistant Plasmodium falciparum to the combination artemether-pyrimethamine were evaluated in patients with acute uncomplicated falciparum malaria. Sixty patients were randomized to receive 3 oral regimens of the combination artemether-pyrimethamine as follows: Regimen-I: artemether (300 mg) plus pyrimethamine (100 mg) on the first day, t…	9031394	Asia	Thailand
Restrepo, M.;Botero, D.;Marquez, R. E.;Boudreau, E. F.;Navaratnam, V.	1996	A clinical trial with halofantrine on patients with falciparum malaria in Colombia	Bulletin of the World Health Organization	74	6	591-7	A total of 120 semi-immune adult male malaria patients from an area of multidrug-resistant Plasmodium falciparum malaria were hospitalized for 42 days in Medellin, Colombia (an area of no malaria transmission), and treated with halofantrine in a double-blind, randomized, prospective clinical trial according to five different treatment schedules. Each patient was assigned to one of the following h…	9060219	S.America	Colombia
Srivastava, H. C.;Sharma, S. K.;Bhatt, R. M.;Sharma, V. P.	1996	Studies on Plasmodium vivax relapse pattern in Kheda district, Gujarat	Indian journal of malariology	33	4	173-9	Relapse pattern in P. vivax malaria was studied in five villages of Nadiad taluka, Kheda district, Gujarat. P. vivax cases treated with 600 mg chloroquine and in combination with 50 mg pyrimethamine (adult dose) yielded 28.31 and 27.73% relapse rate respectively. While relapse rate of 5.78% was observed with five day course of 75 mg primaquine (15 mg/day) administered as radical treatment. Relaps…	9125831	Asia	India
Okoyeh, J. N.;Lege-Oguntoye, L.;Emembolu, J. O.;Sarki, U.	1996	Sensitivity of Plasmodium falciparum to reduced dose of mefloquine in pregnant women in Nigeria	Acta tropica	61	1	1-8	Mefloquine base, (12.5 mg/kg body weight), was administered as a single oral dose to 34 pregnant women with Plasmodium falciparum parasitaemia. They were followed up in vivo using the modified 28-day WHO extended field test. The sensitivity of P. falciparum isolates obtained from these women to mefloquine (MQ) was evaluated in vitro. All women were parasite negative by day 4 and remained aparasit…	9133160	Africa	Nigeria
Na-Bangchang, K.;Kanda, T.;Tipawangso, P.;Thanavibul, A.;Suprakob, K.;Ibrahim, M.;Wattanagoon, Y.;Karbwang, J.	1996	Activity of artemether-azithromycin versus artemether-doxycycline in the treatment of multiple drug resistant falciparum malaria	The Southeast Asian journal of tropical medicine and public health	27	3	522-5	The efficacy of the combination of artemether with doxycycline or azithromycin was evaluated in 60 patients with acute uncomplicated falciparum malaria who attended malaria clinic in Mae Sot, Tak Province (Thai-Myanmar border). Patients (30 each) were randomized to receive (a) 300 mg artemether together with 100 mg doxycycline as initial doses, followed by 100 mg artemether plus 100 mg doxycyclin…	9185262	Asia	Thailand
Garg, M. R.;Gogtay, N. J.;Kshirsagar, N. A.	1996	Efficacy of sulfadoxine-pyrimethamine in chloroquine resistant falciparum malaria in Bombay	The Journal of the Association of Physicians of India	44	10	683-5	Several reports have confirmed the existence of chloroquine resistant Plasmodium falciparum malaria in Bombay. In the management of these cases, of the therapeutic options available, sulfadoxine-pyrimethamine (SP) (administered as a single dose) is preferred, since quinine has to be administered over a period of 7 days while mefloquine is yet to be marketed in India. With increasing reports of fa…	9251339	Africa	India
Touze, J. E.;Perret, J. L.;Nicolas, X.;Fourcade, L.;Bernard, J.;Keundjian, A.;Soares, J. M.;Doury, J. C.	1997	Efficacy of low-dose halofantrine for second treatment of uncomplicated falciparum malaria	Lancet	349	9047	255-6		9014922	Africa	Gabon
Smoak, B. L.;R. F. DeFraites;A. J. Magill;K. C. Kain;B. T. Wellde	1997	Plasmodium vivax infections in U.S. Army troops: failure of primaquine to prevent relapse in studies from Somalia	The American journal of tropical medicine and hygiene	56	2	231-4	Different strains of Plasmodium vivax vary in their sensitivity to primaquine, the only drug that prevents relapses. Described are the clinical data and relapse pattern for 75 soldiers treated for vivax malaria since returning from Somalia. Following their initial attack of malaria, 60 of the 75 cases received a standard course of primaquine (15 mg base daily for 14 days). Twenty-six of the 60 so…	9080885	Africa	Travellers
Fryauff, D. J.;Baird, J. K.;Candradikusuma, D.;Masbar, S.;Sutamihardja, M. A.;Leksana, B.;Tuti, S.;Marwoto, H.;Richie, T.;Romzan, A.	1997	Survey of in vivo sensitivity to chloroquine by Plasmodium falciparum and P. vivax in Lombok, Indonesia	The American journal of tropical medicine and hygiene	56	2	241-4	A malariometric survey was conducted in 14 villages of Sekotong district, in Lombok, Indonesia during October 1994. Point prevalence of malaria ranged from 0% to 15% in the surveyed villages, averaging 6% overall, and Plasmodium falciparum accounted for 63% of the infections. Forty-nine patients with uncomplicated malaria and parasite counts ranging from 40 to 10,800 asexual forms/microliter were…	9080887	Asia	Indonesia
Fryauff, D. J.;Baird, J. K.;Basri, H.;Wiady, I.;Purnomo;Bangs, M. J.;Subianto, B.;Harjosuwarno, S.;Tjitra, E.;Richie, T. L.;Hoffman, S. L.	1997	Halofantrine and primaquine for radical cure of malaria in Irian Jaya, Indonesia	Annals of tropical medicine and parasitology	91	1	7-16	The combination of halofantrine and primaquine therapies was calculated as a regimen for achieving radical curve of falciparum or vivax malaria in Irian Jaya, Indonesia, and compared with combined chloroquine and primaquine therapies. The patients who volunteered for the study [adult, male, Indonesian immigrants with no previous exposure to endemic malaria, normal glucose-6-phosphate dehydrogenas…	9093424	Asia	Indonesia
Falade, C. O.;Salako, L. A.;Sowunmi, A.;Oduola, A. M.;Larcier, P.	1997	Comparative efficacy of halofantrine, chloroquine and sulfadoxine-pyrimethamine for treatment of acute uncomplicated falciparum malaria in Nigerian children	Transactions of the Royal Society of Tropical Medicine and Hygiene	91	1	58-62	One hundred and ten children aged 6 months to 11 years were randomly treated with halofantrine (HF), sulfadoxine-pyrimethamine (S-P) or chloroquine (CQ) for acute uncomplicated Plasmodium falciparum malaria in an endemic area of south-western Nigeria. The response of infection to treatment in each child was monitored for 14 d. The mean fever clearance times were 1.9 d (n = 36), 1.6 d (n = 27), an…	9093631	Africa	Nigeria
Sowunmi, A.;Oduola, A. M.;Ogundahunsi, O. A.;Falade, C. O.;Gbotosho, G. O.;Salako, L. A.	1997	Enhanced efficacy of chloroquine-chlorpheniramine combination in acute uncomplicated falciparum malaria in children	Transactions of the Royal Society of Tropical Medicine and Hygiene	91	1	63-7	Chlorpheniramine, a histamine H1 receptor antagonist, reverse chloroquine resistance in Plasmodium falciparum in vitro. However, the clinical significance of this remains unclear. We have evaluated the efficacy of chloroquine and a chloroquine-chlorpheniramine combination in 112 consecutive children with acute symptomatic uncomplicated falciparum malaria. There was no significant difference in th…	9093632	Africa	Nigeria
Okoyeh, J. N.;Lege-Oguntoye, L.;Ugbode, R. O.;Ogunrinde, G. O.	1997	Responses of multidrug-resistant Plasmodium falciparum parasites to mefloquine in Nigerian children	Tropical medicine & international health	2	4	319-24	Thirty-three children aged 6 months to 7 years from an area with multidrug-resistant Plasmodium falciparum strains were treated with 25 mg/kg body weight of mefloquine base as a single oral dose. They were followed-up using the modified 28-day WHO extended field test. The parasite isolates from these patients were cultured in vitro with different concentrations of mefloquine. All children were pa…	9171839	Africa	Nigeria
de Alencar, FE;Cerutti, C Jr;Durlacher, RR; Boulos, M; Alves, FP; Milhous, W; Pang, LW.	1997	Atovaquone and proguanil for the treatment of malaria in Brazil	The Journal of infectious diseases	175	6	1544-7	The purpose of this study was to compare an experimental regimen of atovaquone plus proguanil with the standard regimen of quinine plus tetracycline for the treatment of uncomplicated falciparum malaria. The study was designed as an open, randomized study of men presenting with symptoms of uncomplicated malaria and thick-smear slide confirmation of parasitemia (1000-100,000 ring forms/microL). Su…	9180204	S.America	Brazil
Wakibara, J. V.;Mboera, L. E.;Ndawi, B. T.	1997	Malaria in Mvumi, central Tanzania and the in vivo response of Plasmodium falciparum to chloroquine and sulphadoxine pyrimethamine	East African medical journal	74	2	69-71	A study on the prevalence of malaria and the response of Plasmodium falciparum to chloroquine and sulphadoxine-pyrimethamine was conducted in Mvumi area of central Tanzania. Splenomegaly was observed at a rate of 62% and 36% in children and adults respectively. Crude malaria parasite rate was 55.4% in children and 32% in adults. Plasmodium falciparum accounted for the highest proportion (62.7%) o…	9185387	Africa	Tanzania
Hung, Le, N.;de, V. P. J.;Le, T. D.;Bich, L.;Ho, P. L.;Tran, N. H.;Nguyen, V. M.;Trinh, K. A.;Kager, P. A.	1997	Single dose artemisinin-mefloquine versus mefloquine alone for uncomplicated falciparum malaria	Transactions of the Royal Society of Tropical Medicine and Hygiene	91	2	191-4	The efficacy of the combination of a single oral dose of 500 mg artemisinin with a single 500 mg oral dose of mefloquine (AM) in the treatment of uncomplicated falciparum malaria was compared to mefloquine therapy alone (M) in a double-'blind' randomized study in an endemic area in the south of Viet Nam where single low dose treatment was employed and where mefloquine had been recently introduced…	9196767	Asia	Vietnam
Na-Bangchang, K.;Congpuong, K.;Sirichaisinthop, J.;Suprakorb, K.;Karbwang, J.	1997	Compliance with a 2 day course of artemether-mefloquine in an area of highly multi-drug resistant Plasmodium falciparum malaria	British journal of clinical pharmacology	43	6	639-42	AIMS: Multi-drug resistant Plasmodium falciparum malaria is a rapidly increasing problem in the world, particularly Thailand. Practical antimalarial regimens which are highly effective against multi-drug resistant parasites with short-term course of administration are needed. In this study, we assessed the patient compliance of a short course regimen using artemether-mefloquine. METHODS: Clinical…	9205825	Asia	Thailand
Ndyomugyenyi, R.;Magnussen, P.	1997	In vivo sensitivity of Plasmodium falciparum to chloroquine and sulfadoxine-pyrimethamine in school children in Hoima district, western Uganda	Acta tropica	66	3	137-43	In vivo testing of Plasmodium falciparum sensitivity to chloroquine and sulfadoxine-pyrimethamine was carried out among asymptomatic school children from seven schools in four sub-counties in Hoima District in western Uganda. Seven hundred and twenty five children were screened, 487 (67%) had parasitaemia and 307 met the inclusion criteria. Full sensitivity to chloroquine in urban areas was found…	9210964	Africa	Uganda
Antia-Obong, O. E.;Alaribe, A. A.;Young, M. U.;Bassy, A.;Etim, B. V.	1997	Chloroquine-resistant Plasmodium falciparum among children in Calabar, south eastern Nigeria	Tropical doctor	27	3	146-9	Sixty-nine children aged between 6 and 60 months with parasitologically proven Plasmodium falciparum malaria were treated with chloroquine (2.5 mg/kg) in the Children's Emergency Room of the University of Calabar Teaching Hospital (UCTH) in 1993. Thirty subjects (mean age 27.8 months) and 39 (mean age 29.5 months) received chloroquine phosphate suppository (Pharma Deko) and chloroquine sulphate s…	9227007	Africa	Nigeria
Looareesuwan, S.;Wilairatana, P.;Viravan, C.;Vanijanonta, S.;Pitisuttithum, P.;Kyle, D. E.	1997	Open randomized trial of oral artemether alone and a sequential combination with mefloquine for acute uncomplicated falciparum malaria	The American journal of tropical medicine and hygiene	56	6	613-7	One hundred fifty-one patients with acute uncomplicated falciparum malaria were enrolled in a randomized, open-label study of oral artemether given alone for five or seven days or a sequential treatment of oral artemether followed by mefloquine. Forty patients received oral artemether, 100 mg initially, then 50 mg every 12 hr for a total dose of 500 mg over a five-day period: Group I. Fifty-eight…	9230790	Asia	Thailand
Baird, J. K.;Wiady, I.;Fryauff, D. J.;Sutanihardja, M. A.;Leksana, B.;Widjaya, H.;Kysdarmanto;Subianto, B.	1997	In vivo resistance to chloroquine by Plasmodium vivax and Plasmodium falciparum at Nabire, Irian Jaya, Indonesia	The American journal of tropical medicine and hygiene	56	6	627-31	A survey of resistance to chloroquine by Plasmodium vivax and P. falciparum was conducted during May 1995 at three mesoendemic villages 30 km southeast of Nabire, near the central northern coast of Irian Jaya, Indonesia. The prevalence of malaria at Urusumu (n = 157), Margajaya (n = 573), and Topo (n = 199) was 18%. 9%, and 9%, respectively, with spleen rates among children of 79%, 10%, and 27%. …	9230793	Asia	Indonesia
Looareesuwan, S.;Wilairatana, P.;Vanijanonta, S.;Pitisuttithum, P.;Ratanapong, Y.;Andrial, M.	1997	Monotherapy with sodium artesunate for uncomplicated falciparum malaria in Thailand: a comparison of 5- and 7-day regimens	Acta tropica	67	3	197-205	We compared the safety and efficacy of two treatment regimens using sodium artesunate in 91 randomized patients with uncomplicated falciparum malaria acquired in Thailand. One group of 45 patients received 400 mg of artesunate on the first day of treatment and then 200 mg daily for 4 days for a total of 1200 mg (group I: 5-day treatment). A second group of 46 patients received 400 mg of artesunat…	9241384	Asia	Thailand
Villadary, I.;Paquet, C.;Hemelsdael, E.;Blanchard, G.;Saki, Z. M.	1997	In vivo drug sensitivity of Plasmodium falciparum in the Tabou region of Ivory Coast	Bulletin de la Societe de pathologie exotique	90	1	10-13	Malaria caused by Plasmodium falciparum is one of the major health problems in West-Africa, mainly affecting young children. This situation is further complicated by the emergence and rapid progression of resistance to chloroquine, the recommended first line treatment. In order to document the level of resistance of P. falciparum to chloroquine, pyrimethamine/sulfadoxine (Fansidar) and quinine, w…	9264740	Africa	Cote d'Ivoire
Salcedo, J. M.;Camargo, L. M.;Braga, M. F.;de, M. P. S.;Macedo, V. O.	1997	The evaluation of the efficacy of artesunate combined with tetracycline in the therapy of falciparum malaria	Revista da Sociedade Brasileira de Medicina Tropical	30	3	215-22	A controlled clinical therapeutic study in hospitalized patients compared artesunate with quinine and mefloquine in patients with uncomplicated falciparum malaria. Forty two patients entered the trial and the follow up was for 28 days with thick blood film taken every 12 hours until became negative. Laboratory examinations included haematological and biochemical tests before and after treatment. …	9273568	S.America	Brazil
Sokhna, C. S.;Molez, J. F.;Ndiaye, P.;Sane, B.;Trape, J. F.	1997	In vivo chemosensitivity tests of Plasmodium falciparum to chloroquine in Senegal: the development of resistance and the assessment of therapeutic efficacy	Bulletin de la Societe de pathologie exotique	90	2	83-9	The efficacity of oral chloroquine was assessed in 360 out-clinic patients with symptomatic Plasmodium falciparum malaria who were enrolled at five sites, in four administrative regions of Senegal, between 1991 and 1995. They were three rural areas: Mlomp (Casamance), Bandafassilbel (Eastern Senegal), Diohine (Sine-Saloum) and one urban area: Pikine (agglomeration of Dakar). Parasitological failu…	9289259	Africa	Senegal
Wilairatana, P.;Kyle, D. E.;Looareesuwan, S.;Chinwongprom, K.;Amradee, S.;White, N. J.;Watkins, W. M.	1997	Poor efficacy of antimalarial biguanide-dapsone combinations in the treatment of acute, uncomplicated, falciparum malaria in Thailand	Annals of tropical medicine and parasitology	91	2	125-32	Combinations of dapsone with proguanil or chlorproguanil have proved effective in the treatment of chloroquine-resistant falciparum malaria in Africa and for prophylaxis in Asia. These combinations have not been used for treatment in areas with multi-drug-resistant parasites such as in Thailand. Combinations of dapsone (approximately 4 mg/kg) plus ether proguanil (approximately 8 mg/kg; DP regime…	9307653	Asia	Thailand
Vaillant, M.;Millet, P.;Luty, A.;Tshopamba, P.;Lekoulou, F.;Mayombo, J.;Georges, A. J.;Deloron, P.	1997	Therapeutic efficacy of clindamycin in combination with quinine for treating uncomplicated malaria in a village dispensary in Gabon	Tropical medicine & international health	2	9	917-9	The efficacy of a 3-day clindamycin-quinine regimen to treat clinical malaria attacks was investigated in 256 children from western Gabon. Treatment was well tolerated by all of the children and its efficacy was higher than 97% by day 20. Thus this 3-day clindamycin-quinine regimen might constitute a potential alternative to chloroquine for treating clinical malarial attacks in children from Gabo…	9315051	Africa	Gabon
Amukoye, E.;Winstanley, P. A.;Watkins, W. M.;Snow, R. W.;Hatcher, J.;Mosobo, M.;Ngumbao, E.;Lowe, B.;Ton, M.;Minyiri, G.;Marsh, K.	1997	Chlorproguanil-dapsone: effective treatment for uncomplicated falciparum malaria	Antimicrobial agents and chemotherapy	41	10	2261-4	Pyrimethamine-sulfadoxine, the first choice for uncomplicated falciparum malaria in Africa, exerts strong selection pressure for resistance because of its slow elimination. It is likely that resistance will emerge rapidly, and there is no widely affordable replacement. Chlorproguanil-dapsone is cheap, rapidly eliminated, more potent than pyrimethamine-sulfadoxine, and could be introduced in the n…	9333058	Africa	Kenya
Ringwald, P.;Bickii, J.;Same-Ekobo, A.;Basco, L. K.	1997	Pyronaridine for treatment of Plasmodium ovale and Plasmodium malariae infections	Antimicrobial agents and chemotherapy	41	10	2317-9	The clinical efficacy of oral pyronaridine was assessed in 22 symptomatic Cameroonian patients infected with Plasmodium ovale or Plasmodium malariae. All patients were cured on or before day 4. In vitro drug assays confirmed the sensitivity of P. ovale and P. malariae isolates to chloroquine and pyronaridine.	9333075	Africa	Cameroon
von Seidlein, L;Jaffar, S.;Pinder, M.;Haywood, M.;Snounou, G.;Gemperli, B.;Gathmann, I.;Royce, C.;Greenwood, B.	1997	Treatment of African children with uncomplicated falciparum malaria with a new antimalarial drug, CGP 56697	The Journal of infectious diseases	176	4	1113-6	New antimalarial drugs are urgently needed. The use of short courses of the new antimalarial drug artemether as monotherapy has been limited by secondary malaria episodes following parasite clearance. Therefore, a new antimalarial drug, CGP 56697, has been developed, which combines artemether with a longer-acting antimalarial agent, benflumetol. A safety trial was undertaken in 60 Gambian childre…	9333180	Africa	Gambia
Falaschi, F.;Ansaloni, L.	1997	Chloroquine versus pyrimethamine/sulphadoxine in the treatment of uncomplicated P. falciparum malaria in northern Kenya	East African medical journal	74	5	275-7	The response of P. Falciparum to chloroquine (CQ) and pyrimethamine-sulphadoxine (PSD) in vivo was investigated in 173 indigenous uncomplicated malaria patients at Sololo Hospital, Moyale district in northern Kenya. All the patients were symptomatic and parasitaemic. They were divided in two age groups (children < 10 years, adults > 10 years). They were randomly assigned to receive either CQ or P…	9337001	Africa	Kenya
Bayoumi, R. A.;Dar, F. K.;Tanira, M. O.;Stephen, R. S.;Hussein, M. M.;Hammo, N. E.;Omer, R. I.;Beidas, M. F.;Shalabi, A.;el-Wasila, M.	1997	Effect of previous chloroquine intake on in vivo P. falciparum drug sensitivity	East African medical journal	74	5	278-82	Investigation of the in vivo response of P. falciparum malaria parasites to chloroquine was conducted during 1993/94 in Al-Ain District of Abu Dhabi Emirate, UAE. Sixty seven expatriates who developed falciparum malaria on their return from Pakistan, Oman and Sudan were recruited for the WHO in vivo tests. Of the 67 patients, eight were classified as having RII and RIII responses, while 59 remain…	9337002	Asia	United Arab Emirates
Sheng, W. D.;Jiddawi, M. S.;Hong, X. Q.;Abdulla, S. M.	1997	Treatment of chloroquine-resistant malaria using pyrimethamine in combination with berberine, tetracycline or cotrimoxazole	East African medical journal	74	5	283-4	Two hundred and fifteen patients with chloroquine-resistant malaria were randomised into three groups. The first group of 82 patients were given pyrimethamine and berberine (berberine group), the second group of 64 patients, pyrimethamine and tetracycline (tetracycline group) and the third group of 69 patients were given pyrimethamine and cotrimoxazole (cotrimoxazole group). In the berberine grou…	9337003	Africa	NA
Smithuis, F. M.;Monti, F.;Grundl, M.;Oo, A. Z.;Kyaw, T. T.;Phe, O.;White, N. J.	1997	Plasmodium falciparum: sensitivity in vivo to chloroquine, pyrimethamine/sulfadoxine and mefloquine in western Myanmar	Transactions of the Royal Society of Tropical Medicine and Hygiene	91	4	468-72	In Rakhine State, on the western border of Myanmar, the efficacy of chloroquine (CQ) and pyrimethamine/ sulfadoxine (PS), the current treatments for uncomplicated Plasmodium falciparum malaria in this area, was evaluated in an open comparative study of 289 patients, stratified prospectively into 3 age groups. Chloroquine treatment was associated with more rapid clinical recovery (P = 0.03), but t…	9373658	Asia	Myanmar
Rowland, M.;Durrani, N.;Hewitt, S.;Sondorp, E.	1997	Resistance of falciparum malaria to chloroquine and sulfadoxine-pyrimethamine in Afghan refugee settlements in western Pakistan: surveys by the general health services using a simplified in vivo test	Tropical medicine & international health	2	11	1049-56	Surveys of drug resistant falciparum malaria were conducted in several Afghan refugee settlements, distributed over a 700 km range in western Pakistan, during the transmission seasons of 1994 and 1995. Symptomatic malaria patients were recruited by a process of passive case detection at the refugees' basic health units. To facilitate follow-up by local health workers, a modified version of the WH…	9391507	Asia	Pakistan
Segurado, A. A.;di, S. S. M.;Shiroma, M.	1997	In vivo and in vitro Plasmodium falciparum resistance to chloroquine, amodiaquine and quinine in the Brazilian Amazon	Revista do Instituto de Medicina Tropical de Sao Paulo	39	2	85-90	In order to study the chemoresistance of Plasmodium falciparum to commonly used antimalarial drugs in Brazil the authors have studied ten patients with falciparum malaria, acquired in the Brazilian Amazon region. Patients were submitted to in vivo study of drug sensitivity, after chemotherapy with either 4-aminoquinolines (chloroquine or amodiaquine) or quinine. Adequate drug absorption was confi…	9394520	S.America	Brazil
Valecha, N.;Gupta, S.;Usha, D.;Biswas, S.;Sharma, A.;Adak, T.;Asthana, O. P.;Sharma, V. P.	1997	Efficacy of alpha,beta-arteether in acute uncomplicated P. falciparum malaria	International journal of clinical pharmacology research	17	1	11-15	A phase-III clinical trial was conducted in 50 patients (42M + 8F) with acute uncomplicated falciparum malaria from Delhi during the period of September to November 1995. Their mean age was 27.2 years, and the mean parasitaemia on day 0 was 0.65%. Patients were hospitalized and treated with a new ethyl derivative of artemisinin developed at CDRI called alpha, beta-arteether, at the dosage of 150 …	9403348	Asia	India
le Hesran, J. Y.;Boudin, C.;Cot, M.;Personne, P.;Chambon, R.;Foumane, V.;Verhave, J. P.;de, V. C.	1997	In-vivo resistance of Plasmodium falciparum to chloroquine and amodiaquine in south Cameroon and age-related efficacy of the drugs	Annals of tropical medicine and parasitology	91	6	661-4		9425369	Africa	Cameroon
Lwin, M.;Aung, S.;Kyaw, M. P.;Aung, H.;Sint, N.;Win, Y.;Oo, H.;Thein, H.;Tun, S. M.	1997	A simplified in vivo drug sensitivity test for malaria in the field	The Southeast Asian journal of tropical medicine and public health	28	2	247-53	The study was intended to develop a simple and reliable in vivo field test for monitoring of sensitivity of P.falciparum to antimalarials. The test is to be used as a built in sustainable monitoring system and applied at regular frequencies to provide guidance in developing a country-wide antimalarial drug policy. The study was conducted as a hospital based study in Mon State in Mudon, Kamawet an…	9444001	Asia	Myanmar
Price, R. N.;Nosten, F.;Luxemburger, C.;van, V. M.;Phaipun, L.;Chongsuphajaisiddhi, T.;White, N. J.	1997	Artesunate/mefloquine treatment of multi-drug resistant falciparum malaria	Transactions of the Royal Society of Tropical Medicine and Hygiene	91	5	574-7	On the western border of Thailand, in an area endemic for multi-drug resistant Plasmodium falciparum malaria, therapeutic responses were assessed in 1967 patients with uncomplicated falciparum malaria treated with 3 d of artesunate (total dose 12 mg/kg) plus mefloquine (total dose 25 mg/kg). The regimen was well tolerated and resulted in a rapid clinical response; within 48 h, 96% of patients wer…	9463672	Asia	Thailand
Sowunmi, A.;Oduola, A. M.	1997	Comparative efficacy of chloroquine/chlorpheniramine combination and mefloquine for the treatment of chloroquine-resistant Plasmodium falciparum malaria in Nigerian children	Transactions of the Royal Society of Tropical Medicine and Hygiene	91	6	689-93	The efficacy of chloroquine for treating uncomplicated Plasmodium falciparum malaria was evaluated in 98 children in Nigeria. Forty-three children failed chloroquine treatment (21 RI, 20 RII, 2 RIII) and were allocated at random to receive multiple doses of a combination of chloroquine and chlorpheniramine or a single dose of mefloquine orally. The parasite and fever clearance times were 2.7 +/- …	9509181	Africa	Nigeria
Thimasarn, K.;Sirichaisinthop, J.;Chanyakhun, P.;Palananth, C.;Rooney, W.	1997	A comparative study of artesunate and artemether in combination with mefloquine on multidrug resistant falciparum malaria in eastern Thailand	The Southeast Asian journal of tropical medicine and public health	28	3	465-71	Plasmodium falciparum in Thailand is highly resistant to chloroquine, sulfadoxine-pyrimethamine and there is increasing resistance to quinine and mefloquine. The use of qinghaosu derivatives alone or in combination with mefloquine has been shown successfully effective against multidrug resistant P. falciparum in many clinical trials. However their applications with ambulatory treatment should be …	9561593	Asia	Thailand
Jiao, X.;Liu, G. Y.;Shan, C. O.;Zhao, X.;Li, X. W.;Gathmann, I.;Royce, C.	1997	Phase II trial in China of a new, rapidly-acting and effective oral antimalarial, CGP 56697, for the treatment of Plasmodium falciparum malaria	The Southeast Asian journal of tropical medicine and public health	28	3	476-81	One hundred and two Chinese out-patients with naturally acquired, previously untreated, falciparum malaria were selected to evaluate the efficacy of a new combination anti-malaria therapy, CGP 56697 (artemether plus benflumetol). In this open non-comparative trial each patient received a combination of 80 mg artemether and 480 mg benflumetol given orally at 0, 8, 24 and 48 hours (total: 320 mg ar…	9561595	Asia	China
Chambon, R.;Lemardeley, P.;Boudin, C.;Ringwald, P.;Chandenier, J.	1997	Surveillance of the in vivo sensitivity of Plasmodium falciparum to antimalarial agents: the results of initial tests of the OCEAC Malaria Network	Medecine tropicale : revue du Corps de sante colonial	57	4	357-60	The Malaria Control Division of the Organization for Endemic Disease Control in Central Africa (OCEAC) has developed a standardized method to measure the in vivo sensitivity of Plasmodium falciparum to antimalarial drugs. Between May 1996 and February 1997, a first series of tests using this method was carried out to determine the sensitivity of Plasmodium falciparum to chloroquine and amodiaquin…	9612776	Africa	Multicentred
Bunnag, D.;Kanda, T.;Karbwang, J.;Thimasarn, K.;Pungpak, S.;Harinasuta, T.	1997	Two doses of artemether/mefloquine or artesunate/mefloquine combination for multidrug resistant falciparum Malaria	The Southeast Asian journal of tropical medicine and public health	28	4	727-30	Plasmodium falciparum in Southeast Asia is highly resistant to chloroquine, sulfadoxine/ pyrimethamine, quinine and even mefloquine. The use of two doses of short course artemether/mefloquine combination has been shown to be effective in a recent study. In the present study, we have assessed the efficacy of short course treatment with artesunate/mefloquine, in comparison with artemether/mefloquin…	9656393	Asia	Thailand
Li, G. Q.;Fu, Y. X.;Bian, W. X.	1997	Comparison on treatment of falciparum malaria with different courses of artesunate tablet	Chinese journal of integrated traditional and Western medicine	17	3	143-4	OBJECTIVE: To assess the efficacy of Artesunate on falciparum malaria. METHODS: A randomized controlled study on the treatment of 90 uncomplicated falciparum malaria patients was carried out with 400 mg of artesunate tablet as a total dose over 3 days, 600 mg over 5 days and 800 mg over 7 days. RESULTS: All patients were cured. Fever clearance time (FCT) and parasite clearance time(PCT) among the…	9863077	Asia	China
Xu, C.;Ding, Y.;Qi, Z.	1997	Efficacy of dihydroartemisinin in treatment of 37 malaria cases	Chinese journal of internal medicine	36	3	187-9	Dihydroartemisinin is an efficacious derivative of artemisinin which can be taken orally in treatment of malaria with less side reactions. Thirty-seven cases with malaria were treated with this drug in Beijing and in Ruili City, Yunnan Province. Out of them, 25 cases suffered from falciparum malaria with an average parasitemia of 73,218/microliter and 12 from vivax malaria with an average parasit…	10374314	Asia	China
van Vugt, M; Brockman, A; Gemperli, B; Luxemburger C; Gathmann I; Royce C; Slight T; Looareesuwan S; White NJ; Nosten F.	1998	Randomized comparison of artemether-benflumetol and artesunate-mefloquine in treatment of multidrug-resistant falciparum malaria	Antimicrobial agents and chemotherapy	42	1	135-9	An open, randomized comparison of artemether-benflumetol (CGP 56 697; Novartis) with artesunate-mefloquine was conducted in 617 patients with acute uncomplicated multidrug-resistant falciparum malaria on the western border of Thailand. Both treatments rapidly and reliably cleared fever and parasitemia, and there was no significant difference in the initial therapeutic response parameters. Parasit…	9449273	Asia	Thailand
Sabchareon, A.;Attanath, P.;Chanthavanich, P.;Phanuaksook, P.;Prarinyanupharb, V.;Poonpanich, Y.;Mookmanee, D.;Teja-Isavadharm, P.;Heppner, D. G.;Brewer, T. G.;Chongsuphajaisiddhi, T.	1998	Comparative clinical trial of artesunate suppositories and oral artesunate in combination with mefloquine in the treatment of children with acute falciparum malaria	The American journal of tropical medicine and hygiene	58	1	11-16	A randomized pilot study to compare the safety and efficacy of artesunate suppositories (15 mg/kg/day for three days) versus oral artesunate (6 mg/kg/day for three days), both in combination with mefloquine (25 mg/kg), was conducted in 52 Thai children with uncomplicated multidrug-resistant falciparum malaria. Forty-five patients (87%) had a full 28-day follow-up in the hospital to assess efficac…	9452284	Asia	Thailand
Batty, K. T.;Thu, L. T.;Davis, T. M.;Ilett, K. F.;Mai, T. X.;Hung, N. C.;Tien, N. P.;Powell, S. M.;Thien, H. V.;Binh, T. Q.;Kim, N. V.	1998	A pharmacokinetic and pharmacodynamic study of intravenous vs oral artesunate in uncomplicated falciparum malaria	British journal of clinical pharmacology	45	2	123-9	AIMS: To obtain comprehensive pharmacokinetic and pharmacodynamic data for artesunate (ARTS) and its active metabolite dihydroartemisinin (DHA) following i.v. and oral administration of ARTS to patients with acute, uncomplicated falciparum malaria. METHODS: Twenty-six Vietnamese patients with falciparum malaria were randomized to receive either i.v. ARTS (120 mg; group 1) or oral ARTS (100 mg; gr…	9491824	Asia	Vietnam
Ringwald, P.;Bickii, J.;Basco, L. K.	1998	Efficacy of oral pyronaridine for the treatment of acute uncomplicated falciparum malaria in African children	Clinical infectious diseases	26	4	946-53	Pyronaridine is a new antimalarial agent developed in China. In this randomized, unblinded study, the safety, tolerance, and clinical efficacy of pyronaridine (n = 44) were evaluated and compared with those of chloroquine (n = 44), the standard first-line antimalarial drug in most of Africa, in 88 Cameroonian children with acute uncomplicated falciparum malaria. The target sample size was determi…	9564481	Africa	Cameroon
Sarma, P. S.;Mandal, A. K.;Khamis, H. J.	1998	Allopurinol as an additive to quinine in the treatment of acute complicated falciparum malaria	The American journal of tropical medicine and hygiene	58	4	454-7	The emergence of chloroquine resistance, and a world-wide scarcity of quinine, have resulted in a search for newer antimalarial drugs directed against falciparum malaria. Allopurinol causes virtually complete inhibition of purine biosynthesis of malaria parasites, which may prove lethal to the parasites. This study was designed to examine if allopurinol is additive to quinine in the treatment of …	9574791	Asia	India
Ashton, M.;Nguyen, D. S.;Nguyen, V. H.;Gordi, T.;Trinh, N. H.;Dinh, X. H.;Nguyen, T. N.;Le, D. C.	1998	Artemisinin kinetics and dynamics during oral and rectal treatment of uncomplicated malaria	Clinical pharmacology and therapeutics	63	4	482-93	OBJECTIVE: To compare parasite clearance times after oral and rectal administration of artemisinin in adults with uncomplicated malaria and to relate pharmacodynamics with artemisinin kinetics and to disclose any pharmacokinetic changes during treatment. METHODS: Thirty male Vietnamese patients with falciparum malaria were randomized to treatment with 500 mg artemisinin daily by either the oral o…	9585803	Asia	Vietnam
Sowunmi, A.;Oduola, A. M.;Ogundahunsi, O. A.;Salako, L. A.	1998	Enhancement of the antimalarial effect of chloroquine by chloropheniramine in vivo	Tropical medicine & international health	3	3	177-83	The efficacy of chloroquine and chloroquine plus chloropheniramine, a histamine H1 receptor blocker which reverses chloroquine insensitivity in Plasmodium falciparum in vitro, was studied in 96 children with acute symptomatic uncomplicated falciparum malaria. The chloroquine/chloropheniramine combination produced a significantly higher cure rate than chloroquine alone and cured 77% of children wi…	9593355	Africa	Nigeria
Lell, B.;Lehman, L. G.;Schmidt-Ott, J. R.;Sturchler, D.;Handschin, J.;Kremsner, P. G.	1998	Malaria chemotherapy trial at a minimal effective dose of mefloquine/sulfadoxine/pyrimethamine compared with equivalent doses of sulfadoxine/pyrimethamine or mefloquine alone	The American journal of tropical medicine and hygiene	58	5	619-24	In murine malaria the addition of mefloquine to sulfadoxine/pyrimethamine has been shown to exert an additive effect and to significantly slow the emergence of resistance to the individual components. In a pilot study carried out in Gabon, a reduced dosage of the triple combination with a mean of 1 mg/kg of mefloquine/2 mg/kg of sulfadoxine/0.1 mg/kg of pyrimethamine (Fansimef; Roche, Basel, Swit…	9598451	Africa	Gabon
von Seidlein, L;Bojang, K.;Jones, P.;Jaffar, S.;Pinder, M.;Obaro, S.;Doherty, T.;Haywood, M.;Snounou, G.;Gemperli, B.;Gathmann, I.;Royce, C.;McAdam, K.;Greenwood, B.	1998	A randomized controlled trial of artemether/benflumetol, a new antimalarial and pyrimethamine/sulfadoxine in the treatment of uncomplicated falciparum malaria in African children	The American journal of tropical medicine and hygiene	58	5	638-44	We report here the results of a randomized double blind trial comparing coartemether (CGP56697), a combination of artemether and benflumetol, with pyrimethamine/sulfadoxine (P/S). Two hundred eighty-seven children 1-5 years of age with uncomplicated falciparum malaria were enrolled at two centers in The Gambia between July 1996 and December 1996. Following treatment, children were visited at home…	9598454	Africa	Gambia
Hatz, C.;Abdulla, S.;Mull, R.;Schellenberg, D.;Gathmann, I.;Kibatala, P.;Beck, H. P.;Tanner, M.;Royce, C.	1998	Efficacy and safety of CGP 56697 (artemether and benflumetol) compared with chloroquine to treat acute falciparum malaria in Tanzanian children aged 1-5 years	Tropical medicine & international health	3	6	498-504	A randomized, open trial involving 260 Tanzanian children, aged 1-5 years, with acute Plasmodium falciparum malaria was conducted to evaluate the efficacy of the combination antimalarial CGP 56697 (artemether and benflumetol), and to compare it with chloroquine, the standard drug used for malaria treatment in the Kilombero area. Children who had received rescue medication within the first 48 h or…	9657513	Africa	Tanzania
Basco, L. K.;Tahar, R.;Ringwald, P.	1998	Molecular basis of in vivo resistance to sulfadoxine-pyrimethamine in African adult patients infected with Plasmodium falciparum malaria parasites	Antimicrobial agents and chemotherapy	42	7	1811-4	In vitro sulfadoxine and pyrimethamine resistance has been associated with point mutations in the dihydropteroate synthase and dihydrofolate reductase domains, respectively, but the in vivo relevance of these point mutations has not been well established. To analyze the correlation between genotype and phenotype, 10 Cameroonian adult patients were treated with sulfadoxine-pyrimethamine and follow…	9661026	Africa	Cameroon
Bojang, K. A.;Schneider, G.;Forck, S.;Obaro, S. K.;Jaffar, S.;Pinder, M.;Rowley, J.;Greenwood, B. M.	1998	A trial of Fansidar plus chloroquine or Fansidar alone for the treatment of uncomplicated malaria in Gambian children	Transactions of the Royal Society of Tropical Medicine and Hygiene	92	1	73-6	Chloroquine can no longer be recommended as the first-line treatment for uncomplicated malaria in several parts of Africa because of the increasing prevalence of chloroquine resistance. However, chloroquine was a highly effective treatment for malaria not only because of its ability to kill parasites quickly but also because it is an anti-inflammatory drug. Therefore, we have investigated whether…	9692160	Africa	Gambia
Sowunmi, A.;Oduola, A. M.;Ogundahunsi, O. A.;Salako, L. A.	1998	Comparative efficacy of chloroquine plus chlorpheniramine and pyrimethamine/sulfadoxine in acute uncomplicated falciparum malaria in Nigerian children	Transactions of the Royal Society of Tropical Medicine and Hygiene	92	1	77-81	The efficacy of pyrimethamine/sulfadoxine (PS) and chloroquine plus chlorpheniramine, a histamine H1 receptor blocker which reverses chloroquine insensitivity in Plasmodium falciparum in vitro, was evaluated in 100 consecutive children with acute symptomatic uncomplicated falciparum malaria. Parasitaemia on day 3 following initiation of treatment, fever and symptom clearance times were significan…	9692161	Africa	Nigeria
Fryauff, D. J.;Soekartono;Tuti, S.;Leksana, B.;Suradi;Tandayu, S.;Baird, J. K.	1998	Survey of resistance in vivo to chloroquine of Plasmodium falciparum and P. vivax in North Sulawesi, Indonesia	Transactions of the Royal Society of Tropical Medicine and Hygiene	92	1	82-3		9692162	Asia	Indonesia
Soto, J.;Toledo, J.;Rodriquez, M.;Sanchez, J.;Herrera, R.;Padilla, J.;Berman, J.	1998	Primaquine prophylaxis against malaria in nonimmune Colombian soldiers: efficacy and toxicity. A randomized, double-blind, placebo-controlled trial	Annals of internal medicine	129	3	241-4	BACKGROUND: Primaquine had a prophylactic efficacy of 90% to 95% against infection with Plasmodium falciparum and P. vivax in Indonesian settlers. OBJECTIVE: To evaluate the efficacy of primaquine prophylaxis for protecting nonimmune persons from malaria. DESIGN: Randomized, double-blind, placebo-controlled field study. SETTING: A malaria-endemic area in Colombia. PATIENTS: 176 healthy, young, no…	9696733	S.America	Colombia
Di, P. G.;Olliaro, P.;Nardi, S.;Deganello, R.;Allegranzi, B.;Bonora, S.;Vento, S.;Concia, E.	1998	Response of uncomplicated falciparum malaria to oral chloroquine and quinine in Burundi highlands	Acta tropica	70	1	25-33	The in vivo response of falciparum malaria to oral chloroquine and quinine was evaluated in two identical hospital-based, comparative open trials carried out 2 years apart in the same seasonal period at a hospital located in the highlands of Northern Burundi. Children aged 0-14 with uncomplicated falciparum malaria were administered either chloroquine, at 25 mg/kg over 3 days, or quinine, at 10 m…	9707362	Africa	Burundi
Fungladda, W.;Honrado, E. R.;Thimasarn, K.;Kitayaporn, D.;Karbwang, J.;Kamolratanakul, P.;Masngammueng, R.	1998	Compliance with artesunate and quinine + tetracycline treatment of uncomplicated falciparum malaria in Thailand	Bulletin of the World Health Organization	76 Suppl 1		59-66	A randomized, controlled, malaria-clinic-based field trial was conducted to compare compliance with a 7-day quinine + tetracycline regimen and a 5-day 700-mg artesunate regimen for the treatment of uncomplicated falciparum malaria in a community in Thailand. Of 137 patients, aged 15-60 years attending a malaria clinic, 77 received artesunate and 60 received quinine + tetracycline. Compliance and …	9763724	Asia	Thailand
Sabchareon, A.;Attanath, P.;Phanuaksook, P.;Chanthavanich, P.;Poonpanich, Y.;Mookmanee, D.;Chongsuphajaisiddhi, T.;Sadler, B. M.;Hussein, Z.;Canfield, C. J.;Hutchinson, D. B.	1998	Efficacy and pharmacokinetics of atovaquone and proguanil in children with multidrug-resistant Plasmodium falciparum malaria	Transactions of the Royal Society of Tropical Medicine and Hygiene	92	2	201-6	A trial was conducted in 32 Thai children with uncomplicated multidrug-resistant falciparum malaria to assess the efficacy, safety and pharmacokinetics of atovaquone and proguanil; plasma concentrations of atovaquone, proguanil and its metabolite, cycloguanil, were measured in a subset of 9 children. The children received atovaquone (17 mg/kg/d for 3 d) plus proguanil (7 mg/kg/d for 3 d). Twenty-…	9764334	Asia	Thailand
Price, R.;Luxemburger, C.;van, V. M.;Nosten, F.;Kham, A.;Simpson, J.;Looareesuwan, S.;Chongsuphajaisiddhi, T.;White, N. J.	1998	Artesunate and mefloquine in the treatment of uncomplicated multidrug-resistant hyperparasitaemic falciparum malaria	Transactions of the Royal Society of Tropical Medicine and Hygiene	92	2	207-11	Oral artesunate is the most effective treatment for uncomplicated hyperparasitaemia in falciparum malaria. To assess the contribution of mefloquine to therapeutic efficacy in an area endemic for mefloquine-resistant Plasmodium falciparum, an open randomized comparison of a 5 d course of oral artesunate (total dose 12 mg/kg) with and without a single dose of mefloquine (25 base mg/kg) was conducte…	9764335	Asia	Thailand
Memon, I. A.; Kanth, N;Murtaza, G.	1998	Chloroquine resistant malaria in children	J Pak Med Assoc	48	4	98-100	-	9783043		Pakistan
Fryauff, D. J.;Tuti, S.;Mardi, A.;Masbar, S.;Patipelohi, R.;Leksana, B.;Kain, K. C.;Bangs, M. J.;Richie, T. L.;Baird, J. K.	1998	Chloroquine-resistant Plasmodium vivax in transmigration settlements of West Kalimantan, Indonesia	The American journal of tropical medicine and hygiene	59	4	513-8	Malariometric surveys were conducted during July 1996 in native Dayak villages and predominantly Javanese transmigration settlements in Ketapang district of West Kalimantan, Indonesia. Malaria prevalence ranged from 0.9% to 2.7% in Dayak villages and from 1% to 20% in the transmigration settlements. Plasmodium falciparum accounted for 67% of the cases among Dayaks but P. vivax was dominant among …	9790420	Asia	Indonesia
McGready, R.;Cho, T.;Cho, J.J.;Simpson, J.A.;Luxemburger, C.;Dubowitz, L.;Looareesuwan, S.;White, N.J.;Nosten, F.	1998	Artemisinin derivatives in the treatment of falciparum malaria in pregnancy	Transactions of the Royal Society of Tropical Medicine and Hygiene	92	4	430-3	An artemisinin derivative (artesunate or artemether) was used for the treatment of multidrug-resistant Plasmodium falciparum malaria in 83 Karen pregnant women in Thailand; 55 women were treated for recrudescent infection following quinine or mefloquine, 12 for uncomplicated hyperparasitaemic episodes, and 16 had not declared their pregnancy when treated. The women were followed weekly until deli…	9850401	Asia	Thailand
Sowunmi, A.;Fehintola, F. A.;Ogundahunsi, O. A.;Oduola, A. M.	1998	Comparative efficacy of chloroquine plus chlorpheniramine and halofantrine in acute uncomplicated falciparum malaria in Nigerian children	Transactions of the Royal Society of Tropical Medicine and Hygiene	92	4	441-5	In the face of growing chloroquine resistance of Plasmodium falciparum, efforts to prolong the clinical usefulness of the drug have partly concentrated on its combination with potential resistance-reversing compounds. However, clinical studies on such combinations have been limited. We have compared the efficacy of halofantrine, an arylaminoalcohol effective in chloroquine resistant malaria, and …	9850404	Africa	Nigeria
Gogtay, N.;Garg, M.;Kadam, V.;Kamtekar, K.;Kshirsagar, N. A.	1998	A 5 days primaquine regimen as anti-relapse therapy for Plasmodium vivax	Transactions of the Royal Society of Tropical Medicine and Hygiene	92	3	341		9861412	Asia	India
Ezzet, F.;Mull, R.;Karbwang, J.	1998	Population pharmacokinetics and therapeutic response of CGP 56697 (artemether + benflumetol) in malaria patients	British journal of clinical pharmacology	46	6	553-61	AIMS: To investigate the pharmacokinetic and pharmacodynamic properties of artemether and benflumetol in a fixed combination tablet (CGP 56697) and to offer an explanation for the lower than expected cure rate in a Thai clinical trial. METHODS: Two hundred and sixty patients were enrolled into a randomized, double-blind, parallel group, dose-finding trial. CGP 56697 was given orally, either as: A…	9862244	Asia	Thailand
Singh, N.;Shukla, M. M.;Asthana, O. P.;Sharma, V. P.	1998	Effectiveness of alpha-beta arteether in clearing Plasmodium falciparum parasitemia in central India (Madhya Pradesh)	The Southeast Asian journal of tropical medicine and public health	29	2	225-7	Forty-six patients (25 Females + 21 Males) of uncomplicated Plasmodium falciparum in districts Jabalpur and Mandla of central India (Madhya Pradesh) were administered alpha-beta arteether (an ethyl derivative of qinghaosu), intramuscularly for 3 consecutive days (150 mg once a day). The results revealed that there was rapid control of fever in all the patients without administration of any antipy…	9886102	Asia	India
Price, R.;van, V. M.;Nosten, F.;Luxemburger, C.;Brockman, A.;Phaipun, L.;Chongsuphajaisiddhi, T.;White, N.	1998	Artesunate versus artemether for the treatment of recrudescent multidrug-resistant falciparum malaria	The American journal of tropical medicine and hygiene	59	6	883-8	The therapeutic efficacy and toxicity of artesunate (2mg/kg/day for five days, then 1 mg/kg/day for two days: total=12 mg/kg) was compared with that of artemether (4 mg/kg followed by 2 mg/kg/day for two days, then 1 mg/kg/day for four days: total=12 mg/kg) for the treatment of recrudescent multidrug-resistant falciparum malaria in an open randomized trial in 443 patients living on the western bo…	9886194	Asia	Thailand
McGready, R.;Cho, T.;Hkirijaroen, L.;Simpson, J.;Chongsuphajaisiddhi, T.;White, N. J.;Nosten, F.	1998	Quinine and mefloquine in the treatment of multidrug-resistant Plasmodium falciparum malaria in pregnancy	Annals of tropical medicine and parasitology	92	6	643-53	Between 1991 and 1996, 372 pregnant women with uncomplicated, multidrug-resistant Plasmodium falciparum malaria, living on the western border of Thailand, were treated with either mefloquine (N = 194), quinine (N = 93) or both drugs (N = 85). Antimalarial treatment was generally well tolerated; the most common side-effects were dizziness (42%) and tinnitus (35%) following quinine, and anorexia (2…	9924543	Asia	Thailand
Mharakurwa, S.;Rangarira, R.;Murahwa, F. C.;Chandiwana, S. K.	1998	Status of chloroquine efficacy against falciparum malaria in the Mola area of Kariba district, Zimbabwe	Annals of tropical medicine and parasitology	92	6	655-61	The therapeutic efficacy of chloroquine was assessed, during the 1997 transmission season, using 64 cases of uncomplicated, falciparum malaria originating from 18 villages in the Mola area of Kariba district, Zimbabwe. Chloroquine effected a modest reduction in asexual parasite density and clinical symptoms. The mean density of asexual parasites on day 3 post-treatment was 24.94% (95% confidence …	9924544	Africa	Zimbabwe
Barduagni, P.;Schwartz, U.;Nyamayaro, W.;Chauke, T. L.	1998	In vivo testing of the therapeutic efficacy of chloroquine on falciparum malaria infections in Chirundu, Mashonaland West, Zimbabwe	The Central African journal of medicine	44	10	251-4	OBJECTIVE: To detect the level of the in vivo chloroquine efficacy in falciparum malaria infections, in order to assess the need for change in the management and treatment of uncomplicated malaria. DESIGN: Prospective descriptive study. SETTING: Chirundu Rural Clinic, Mashonaland West Province. SUBJECTS: 63 patients confirmed by a positive blood slide for P. falciparum who attended Chirundu clini…	10101434	Africa	Zimbabwe
Hombhanje, F. W.;Kereu, R. K.;Bulungol, P.;Paika, R.	1998	Halofantrine in the treatment of uncomplicated falciparum malaria with a three-dose regimen in Papua New Guinea: a preliminary report	Papua and New Guinea medical journal	41	1	23-29	We evaluated the efficacy and safety of halofantrine in 19 patients with acute uncomplicated falciparum malaria. Each patient received oral halofantrine hydrochloride 500 mg every 6 hours for 3 doses (total 1.5 g). In almost all the patients clinical symptoms of malaria and parasitaemia disappeared within 2 and 3 days, respectively, of starting treatment. We observed no recurrence of parasitaemia…	10741174	Asia	Papua New Guinea
Hong-Ping, G.;Yao, Z.;Qian, D.;Jin-Hua, Y.;Kai-Xun, J.;Min, Z.	1998	The in vivo sensitivity of Plasmodium falciparum to chloroquine in the Red River basin, Yunnan, China	The Southeast Asian journal of tropical medicine and public health	29	4	692-5	The sensitivity of Plasmodium falciparum to chloroquine in vivo was examined out in a small town in the Red River basin from 1995 to 1996. forty cases were recruited into the present study, 32 cases were completely followed-up. The results of the in vivo study revealed that only 3 (9%) cases were sensitive to chloroquine, 29 (90.6%) showed resistance to chloroquine, among whom 7 cases (22%) showe…	10772547	Asia	China
Wilairatana, P.;Krudsood, S.;Chokejindachai, W.;Bussaratid, V.;Silachamroon, U.;Viriyavejakul, P.;Hendriksen, C.;Scheiwe, M. W.;Looareesuwan, S.	1998	A clinical trial of combination of artesunate and mefloquine in the treatment of acute uncomplicated falciparum malaria: a short and practical regimen	The Southeast Asian journal of tropical medicine and public health	29	4	696-701	The difficulties in treating drug-resistant falciparum malaria in Thailand are compounded by the necessity of giving antimalarials over long periods of time. The resultant fall in patient compliance not only lowers cure rates but also predisposes to the further spread of drug-resistance. Sequential treatment with artesunate given over 5 days followed by mefloquine produced 100% cure rates in prev…	10772548	Asia	Thailand
Rahman, M. R.;Hassan, M. R.;Faiz, M. A.;Samad, R.;Paul, B.;Jalil, M. A.	1998	Monitoring efficacy of commonly used antimalarials by a 14-day in-vivo test in a new settler's camp in endemic zone at Cox's Bazar	Bangladesh Medical Research Council bulletin	24	3	67-74	The study was done in a new settler's camp "Barachara" under Sadar thana of Cox's Bazar district. It has a total population of 784 of all age groups, registered in the middle of the study period. A prospective evaluation of all cases of fever were done over 12 months, to see the pattern of febrile illness among the population and to compare the therapeutic efficacy of two alternative drug regimen…	10874370	Asia	Bangladesh
Hombhanje, F. W.	1998	Halofantrine versus quinine-Fansidar combination in the treatment of post-chloroquine falciparum parasitaemia	Papua and New Guinea medical journal	41	2011-04-03	112-5	The standard first-line treatment for malaria in adults in Papua New Guinea is chloroquine; for severe and treatment-failure malaria standard therapy is a combination of quinine and Fansidar (sulphadoxine-pyrimethamine). These standard treatments are currently under revision. The present study evaluated the effect of halofantrine in treatment-failure falciparum malaria in adults in Port Moresby c…	10934552	Asia	Papua New Guinea
Pinto, A. Y.;Ventura, A. M.;Calvosa, V. S.;Silva, F. M. G.;Santos, M. A.;Silva, R. S.;Souza, J. M.	1998	Clinical efficacy of four schemes for vivax malaria treatment in children	Jornal de pediatria	74	3	222-7	OBJECTIVES: In the treatment of vivax malaria, an important factor affecting the occurrence of relapse is the duration of treatment. In Belem, a number of patients with vivax malaria were found to be cured despite failure to complete the standard course of treatment. In Belem, a number of patients with vivax malaria were found to be cured despite failure to complete the standard course of treatme…	14685624	S.America	Brazil
Sowunmi, A.;Oduola, A. M.;Ogundahunsi, O. A.;Fehintola, F. A.;Ilesanmi, O. A.;Akinyinka, O. O.;Arowojolu, A. O.	1998	Randomised trial of artemether versus artemether and mefloquine for the treatment of chloroquine/sufadoxine-pyrimethamine-resistant falciparum malaria during pregnancy	Journal of obstetrics and gynaecology : the journal of the Institute of Obstetrics and Gynaecology	18	4	322-7	The efficacy of artemether and artemether followed by mefloquine was evaluated in 45 pregnant women with drug resistant Plasmodium falciparum malaria during the second and third trimesters. There was prompt clinical response to both treatment regimens. The parasite and fever clearance times and the cure rate were similar in both groups. Except for the correlation between initial parasite density …	15512100	Africa	Nigeria
Sowunmi, A.;Fehintola, F. A.;Ogundahunsi, O. A.;Arowojolu, A. O.;Oduola, A. M.	1998	Efficacy of chloroquine plus chlorpheniramine in chloroquine-resistant falciparum malaria during pregnancy in Nigerian women: a preliminary study	Journal of obstetrics and gynaecology : the journal of the Institute of Obstetrics and Gynaecology	18	6	524-7	The efficacy of chloroquine plus chlorpheniramine, a histamine H receptor antagonist, which reverses chloroquine 1 insensitivity in Plasmodium falciparum in vitro and in vivo , was evaluated in 30 pregnant women with recrudescent chloroquine-resistant Plasmodium falciparum malaria. All patients had at least one or more treatment failures with one or more courses of chloroquine or pyrimethamine-su…	15512168	Africa	Nigeria
Goerg, H.;Ochola, S. A.;Goerg, R.	1999	Treatment of malaria tropica with a fixed combination of rifampicin, co-trimoxazole and isoniazid: a clinical study	Chemotherapy	45	1	68-76	The treatment of malaria tropica is becoming difficult because of the increasing drug resistance rates of Plasmodium falciparum against several of the currently available antimalarias. A fixed combination of rifampicin, co-trimoxazole and isoniazid (CotrifazidTM, CF) was found to be highly effective for the treatment of malaria tropica. The aim of the present study in Kenya was to scrutinize this…	9876212	Africa	Kenya
Kaneko, A.;Bergqvist, Y.;Takechi, M.;Kalkoa, M.;Kaneko, O.;Kobayakawa, T.;Ishizaki, T.;Bjorkman, A.	1999	Intrinsic efficacy of proguanil against falciparum and vivax malaria independent of the metabolite cycloguanil	The Journal of infectious diseases	179	4	974-9	Mutations in human CYP2C19 and parasite dihydrofolate reductase (dhfr) genes, related to poor metabolism of proguanil and resistance to cycloguanil, respectively, have both been assumed to be associated with poor antimalarial effect by proguanil. To study this, 95 subjects with uncomplicated Plasmodium falciparum or Plasmodium vivax infections in Vanuatu received proguanil treatment for 3 days (a…	10068594	Asia	Vanuatu
Looareesuwan, S.;Wilairatana, P.;Chokejindachai, W.;Chalermrut, K.;Wernsdorfer, W.;Gemperli, B.;Gathmann, I.;Royce, C.	1999	A randomized, double-blind, comparative trial of a new oral combination of artemether and benflumetol (CGP 56697) with mefloquine in the treatment of acute Plasmodium falciparum malaria in Thailand	The American journal of tropical medicine and hygiene	60	2	238-43	CGP 56697, a new oral fixed combination of artemether and benflumetol, was tested in a double-blinded, randomized trial in 252 adult patients treated either with CGP 56697 (4 x 4 tablets each containing 20 mg of artemether and 120 mg of benflumetol, given at 0, 8, 24, and 48 hr), or with mefloquine (three tablets of 250 mg at initial diagnosis, followed by two tablets of 250 mg at 8 hr). Baseline…	10072142	Asia	Thailand
Ejov, M. N.;Tun, T.;Aung, S.;Sein, K.	1999	Response of falciparum malaria to different antimalarials in Myanmar	Bulletin of the World Health Organization	77	3	244-9	The purpose of the study was to ascertain the therapeutic efficacy of different treatments for uncomplicated falciparum malaria in the hospitals in Sagaing, northern and eastern Shan, to facilitate updating the existing national antimalarial drug policy. The proposed 14-day trial for monitoring the efficacy of treatments of uncomplicated falciparum malaria is an efficient method for identifying t…	10212515	Asia	Myanmar
Bustos, D. G.;Canfield, C. J.;Canete-Miguel, E.;Hutchinson, D. B.	1999	Atovaquone-proguanil compared with chloroquine and chloroquine-sulfadoxine-pyrimethamine for treatment of acute Plasmodium falciparum malaria in the Philippines	The Journal of infectious diseases	179	6	1587-90	This randomized, open-label clinical trial compared a fixed-dose combination of atovaquone and proguanil (n=55) with chloroquine (n=23) or a combination of chloroquine, sulfadoxine, and pyrimethamine (n=32) for treatment of acute falciparum malaria in the Philippines. Patients were hospitalized for 28 days to ensure medication compliance and prevent reinfection. Atovaquone-proguanil produced a si…	10228090	Asia	Philippines
Looareesuwan, S.;Wilairatana, P.;Chalermarut, K.;Rattanapong, Y.;Canfield, C. J.;Hutchinson, D. B.	1999	Efficacy and safety of atovaquone/proguanil compared with mefloquine for treatment of acute Plasmodium falciparum malaria in Thailand	The American journal of tropical medicine and hygiene	60	4	526-32	The increasing frequency of therapeutic failures in falciparum malaria underscores the need for novel, rapidly effective antimalarial drugs or drug combinations. Atovaquone and proguanil are blood schizonticides that demonstrate synergistic activity against multi-drug-resistant Plasmodium falciparum in vitro. In an open-label, randomized, controlled clinical trial conducted in Thailand, adult pat…	10348224	Asia	Thailand
Fryauff, D. J.;Sumawinata, I.;Purnomo;Richie, T. L.;Tjitra, E.;Bangs, M. J.;Kadir, A.;Ingkokusumo, G.	1999	In vivo responses to antimalarials by Plasmodium falciparum and Plasmodium vivax from isolated Gag Island off northwest Irian Jaya, Indonesia	The American journal of tropical medicine and hygiene	60	4	542-6	There is renewed interest in the rich nickel and cobalt deposits of Pulau Gag, an isolated but malarious island off the northwest coast of Irian Jaya. In preparation for an expanded workforce, an environmental assessment of malaria risk was made, focusing upon malaria prevalence in the small indigenous population, and the in vivo sensitivity of Plasmodium falciparum and P. vivax to chloroquine (C…	10348226	Asia	Indonesia
Anabwani, G.;Canfield, C. J.;Hutchinson, D. B.	1999	Combination atovaquone and proguanil hydrochloride vs. halofantrine for treatment of acute Plasmodium falciparum malaria in children	The Pediatric infectious disease journal	18	5	456-61	BACKGROUND: Malaria is a major cause of pediatric mortality in sub-Saharan Africa. Worldwide estimates of mortality among children with Plasmodium falciparum malaria range from 1 to 2 million deaths per year. Management of malaria is increasingly difficult because of the global spread of drug-resistant strains of P. falciparum. There is an urgent need for safe and effective new therapies to treat…	10353520	Africa	Kenya
Mulenga, M.;Sukwa, T. Y.;Canfield, C. J.;Hutchinson, D. B.	1999	Atovaquone and proguanil versus pyrimethamine/sulfadoxine for the treatment of acute falciparum malaria in Zambia	Clinical therapeutics	21	5	841-52	Atovaquone and proguanil hydrochloride are blood schizonticides that demonstrate in vitro synergy against drug-resistant strains of Plasmodium falciparum. When coadministered, they may therefore be effective for the treatment of malaria in regions where there is known or suspected drug resistance. In an open-label, randomized, parallel-group, clinical trial conducted in Zambia, 163 patients (age …	10397379	Africa	Zambia
Vugt, M. V.;Wilairatana, P.;Gemperli, B.;Gathmann, I.;Phaipun, L.;Brockman, A.;Luxemburger, C.;White, N. J.;Nosten, F.;Looareesuwan, S.	1999	Efficacy of six doses of artemether-lumefantrine (benflumetol) in multidrug-resistant Plasmodium falciparum malaria	The American journal of tropical medicine and hygiene	60	6	936-42	The new oral fixed combination artemether-lumefantrine (CGP 56697) has proved to be an effective and well-tolerated treatment of multi-drug resistant Plasmodium falciparum malaria, although cure rates using the four-dose regimen have been lower than with the currently recommended alternative of artesunate-mefloquine. Two six-dose schedules (total adult dose = 480 mg of artemether and 2,880 mg of …	10403324	Asia	Thailand
van Agtmael, M; Bouchaud, O; Malvy, D; Delmont, J; Danis, M; Barette S; Gras C; Bernard J; Touze JE; Gathmann I; Mull R.	1999	The comparative efficacy and tolerability of CGP 56697 (artemether + lumefantrine) versus halofantrine in the treatment of uncomplicated falciparum malaria in travellers returning from the Tropics to The Netherlands and France	International journal of antimicrobial agents	12	2	159-69	CGP 56697 (Riamet) is a new oral anti-malarial drug composed of artemether and lumefantrine (benflumetol) which combines the fast, short-acting artemether for rapid parasite clearance with the prolonged action of lumefantrine for intended radical cure. In this double-blind, comparative trial, the efficacy and tolerability of CGP 56697, given as a course of 4 x 4 tablets over 48 h, was compared to…	10418762	Travellers	Travellers
Ezedinachi, E. N.;Ekanem, O. J.;Chukwuani, C. M.;Meremikwu, M. M.;Ojar, E. A.;Alaribe, A. A.;Umotong, A. B.;Haller, L.	1999	Efficacy and tolerability of a low-dose mefloquine-sulfadoxine-pyrimethamine combination compared with chloroquine in the treatment of acute malaria infection in a population with multiple drug-resistant Plasmodium falciparum	The American journal of tropical medicine and hygiene	61	1	114-9	The efficacy and tolerability of single, low-dose mefloquine, sulfadoxine-pyrimethamine (MSP) combination was compared with chloroquine (CQ) for malaria treatment in a malaria-endemic area of Nigeria with multiple drug-resistant Plasmodium falciparum. The two drug regimens (MSP and CQ) were tested in a 12-month prospective population study. The patients were divided into two groups. Group 1 patie…	10432067	Africa	Nigeria
van Dillen, J; Custers, M; Wensink, A; Wouters B; van Voorthuizen T; Voorn W; Khan B; Muller L; Nevill C.	1999	A comparison of amodiaquine and sulfadoxine-pyrimethamine as first-line treatment of falciparum malaria in Kenya	Transactions of the Royal Society of Tropical Medicine and Hygiene	93	2	185-8	A randomized 14-day study in vivo compared the response of Plasmodium falciparum malaria to amodiaquine (35 mg/kg) and sulfadoxine-pyrimethamine (sulfadoxine, 25 mg/kg) in symptomatic outpatients at 2 sites in northern and western Kenya during 1993. Of the 239 patients recruited, 181 (76%) completed the study [84 (46%) on amodiaquine and 97 (54%) on sulfadoxine-pyrimethamine]. There were no signi…	10450447	Africa	Kenya
Same-Ekobo, A.;Lohoue, J.;Essono, E.;Ravinet, L.;Ducret, J. P.	1999	Rapid resolution of Plasmodium ovale malarial attacks using artesunate (Arsumax)	Medecine tropicale : revue du Corps de sante colonial	59	1	43-5	This randomized, non-comparative clinical trial without placebo was carried out to assess the efficacy and tolerance of artesunate for treatment of acute Plasmodium ovale malarial attacks. Thirty Cameroonese patients were included. All presented acute Plasmodium ovale malarial attacks with parasitemia in excess of 500 asexual forms per mm3. Four days after treatment with artesunate, all 30 patien…	10472581	Africa	Cameroon
Walsh, D. S.;Looareesuwan, S.;Wilairatana, P.;Heppner, D. G., Jr.;Tang, D. B.;Brewer, T. G.;Chokejindachai, W.;Viriyavejakul, P.;Kyle, D. E.;Milhous, W. K.;Schuster, B. G.;Horton, J.;Braitman, D. J.;Brueckner, R. P.	1999	Randomized dose-ranging study of the safety and efficacy of WR 238605 (Tafenoquine) in the prevention of relapse of Plasmodium vivax malaria in Thailand	The Journal of infectious diseases	180	4	1282-7	WR 238605 is an 8-aminoquinoline developed for the radical cure of Plasmodium vivax. Forty-four P. vivax-infected patients were randomly assigned to 1 of 4 treatment regimens: 3 groups received a blood schizonticidal dose of chloroquine followed by WR 238605: group A (n=15) received 300 mg daily for 7 days; group B (n=11), 500 mg daily for 3 days, repeated 1 week after the initial dose; group C (…	10479159	Asia	Thailand
Mutanda, L. N.	1999	Assessment of drug resistance to the malaria parasite in residents of Kampala, Uganda	East African medical journal	76	8	421-4	OBJECTIVE: To assess drug-resistance of the malaria parasite in elite residents of Kampala city, Uganda. DESIGN: Recruited into the study were patients with complaints of fever, backache and headache or general malaise and body joint pains, could recall their previous treatment for the current complaints and could show laboratory reports indicating presence of malaria parasites. Blood was taken f…	10520345	Africa	Uganda
Premji, Z.;Makwaya, C.;Minjas, J. N.	1999	Current clinical efficacy of chloroquine for the treatment of Plasmodium falciparum infections in urban Dar es Salaam, United Republic of Tanzania	Bulletin of the World Health Organization	77	9	740-4	Reported is the use of a 14-day WHO protocol, which takes into account the clinical, parasitological and haematological responses to antimalarial drugs, to determine the efficacy of chloroquine in the treatment of uncomplicated malaria in young children (n = 200) in urban Dar es Salaam. Chloroquine failure was found in 43% of the children. Of these, 12.5% were considered to be early treatment fai…	10534897	Africa	Tanzania
Na-Bangchang, K.;Tippanangkosol, P.;Ubalee, R.;Chaovanakawee, S.;Saenglertsilapachai, S.;Karbwang, J.	1999	Comparative clinical trial of four regimens of dihydroartemisinin-mefloquine in multidrug-resistant falciparum malaria	Tropical medicine & international health	4	9	602-10	We conducted a randomized, comparative trial at the Bangkok Hospital for Tropical Diseases during 1996-98 to evaluate the clinical efficacy and tolerability of four combination regimens of dihydroartemisinin-mefloquine. 207 male patients aged 18-25 years, weighing 49.3-55.1 kg were randomized to receive a single oral dose of 300 mg dihydroartemisinin plus one or two doses of mefloquine as follows…	10540300	Asia	Thailand
Cerutti, C., Jr.;Durlacher, R. R.;de, A. F. E.;Segurado, A. A.;Pang, L. W.	1999	In vivo efficacy of mefloquine for the treatment of Falciparum malaria in Brazil	The Journal of infectious diseases	180	6	2077-80	Ninety-four patients with falciparum malaria were treated with mefloquine (1000-mg single dose) and remained hospitalized in a malaria-free area for a minimum of 28 days. There was 1 parasitologic failure (grade I resistance [RI]) for a 99% cure rate (95% confidence interval, 94.2%-99.7%). Mean parasite clearance time by thick smear was 45.7 h (SD, 11.4 h). The subject in whom therapy failed had …	10558975	S.America	Brazil
Looareesuwan, S.;Wilairatana, P.;Krudsood, S.;Treeprasertsuk, S.;Singhasivanon, P.;Bussaratid, V.;Chokjindachai, W.;Viriyavejakul, P.;Chalermrut, K.;Walsh, D. S.;White, J.	1999	Chloroquine sensitivity of Plasmodium vivax in Thailand	Annals of tropical medicine and parasitology	93	3	225-30	Chloroquine has been the standard treatment for Plasmodium vivax malaria for more than 40 years in most regions of the world. Recently, however, chloroquine-resistant P. vivax has been reported from Oceania, several parts of Asia, and South America. In order to assess the situation in Thailand, 886 patients with vivax malaria who were admitted to the Bangkok Hospital for Tropical Diseases from 19…	10562823	Asia	Thailand
Fang, C. T.;Chang, S. C.;Chang, H. L.;Chen, Y. C.;Hsueh, P. R.;Hung, C. C.;Hsieh, W. C.	1999	Imported malaria: successful treatment of 31 patients in the era of chloroquine resistance	Journal of the Formosan Medical Association	98	10	683-7	The diagnosis and management of imported malaria presents a continuing challenge in developed countries, including Taiwan. We retrospectively analyzed the records of all 31 patients with imported malaria treated at National Taiwan University Hospital from January 1984 through December 1998. Plasmodium falciparum was identified as the causative malarial parasite in 18 patients, P. vivax in 12, and…	10575838	Travellers	Travellers
Luxemburger, C.;van, V. M.;Jonathan, S.;McGready, R.;Looareesuwan, S.;White, N. J.;Nosten, F.	1999	Treatment of vivax malaria on the western border of Thailand	Transactions of the Royal Society of Tropical Medicine and Hygiene	93	4	433-8	The efficacy of chloroquine (25 mg base/kg over 3 days) in Plasmodium vivax malaria was evaluated in 1995/96 in 342 patients living in an endemic area on the western border of Thailand. Clearance of fever and parasites was obtained within 2 days in > 95% of the patients, and all were aparasitaemic by day 4. Reappearance of P. vivax occurred in 1 patient on day 21 and in 8 by day 28, giving a 28-d…	10674098	Asia	Thailand
Osorio, L. E.;Giraldo, L. E.;Grajales, L. F.;Arriaga, A. L.;Andrade, A. L.;Ruebush, T. K., 2nd;Barat, L. M.	1999	Assessment of therapeutic response of Plasmodium falciparum to chloroquine and sulfadoxine-pyrimethamine in an area of low malaria transmission in Colombia	The American journal of tropical medicine and hygiene	61	6	968-72	Although chloroquine (CQ) resistance was first reported in Colombia in 1961 and sulfadoxine-pyrimethamine (SP) resistance in 1981, the frequency of treatment failures to these drugs in Colombia is unclear. A modified World Health Organization 14-day in vivo drug efficacy test for uncomplicated Plasmodium falciparum malaria in areas with intense malaria transmission was adapted to reflect the clin…	10674680	S.America	Colombia
Wilairatana, P.;Silachamroon, U.;Krudsood, S.;Singhasivanon, P.;Treeprasertsuk, S.;Bussaratid, V.;Phumratanaprapin, W.;Srivilirit, S.;Looareesuwan, S.	1999	Efficacy of primaquine regimens for primaquine-resistant Plasmodium vivax malaria in Thailand	The American journal of tropical medicine and hygiene	61	6	973-7	To define the current efficacy of Fansidar (F. Hoffmann-La Roche Ltd., Basel Switzerland) (pyrimethamine and sulfadoxine), primaquine in a high dose, and artesunate for treating acute Plasmodium vivax malaria, we conducted a comparative clinical trial of these 3 drugs in an open-label study. Patients (15-65 years old) were assigned to 1 of 4 treatments regimens in a serial order. Ninety percent o…	10674681	Asia	Thailand
Parola, P.;Ali, I.;Djermakoye, F.;Crassard, N.;Bendavid, C.;Faugere, B.;Condomines, P.	1999	Chloroquine sensitivity of Plasmodium falciparum at the Gamkalley Clinic and the Nigerian armed forces PMI (Niamey, Niger)	Bulletin de la Societe de pathologie exotique	92	5	317-9	In vivo tests for Plasmodium falciparum were carried out in 1998 during the rainy season among children in Niamey, in the Republic of Niger. Chloroquine was prescribed at 25 mg/kg for 3 days in febrile patients with uncomplicated P. falciparum malaria. Forty-five 1-5 year-olds and thirty-three 6-15 year-olds were included in the study. A group of 53 adult patients was also surveyed to evaluate th…	10690467	Africa	Niger
Le, N. B.;Pham, T. Y.;Nguyen, B. N.;Dang, C. T.;Pham, T. L.;Le, D. C.	1999	Efficacy and effectiveness of five day treatment of uncomplicated falciparum with artemisinin or artesunate in Vietnam	The Southeast Asian journal of tropical medicine and public health	30	1	3-6	A study on efficacy and effectiveness of artemisinin (total dose of 60 mg/kg) and artesunate (total dose of 12 mg/kg over five days) in treatment of uncomplicated malaria was conducted in highly malaria transmitted areas in Vietnam. 126 uncomplicated malaria cases finished 14 day follow-up. 100% cure rate achieved at day 14 in patients of the efficacy groups received either artemisinin or artesun…	10695777	Asia	Vietnam
Doherty, J. F.;Sadiq, A. D.;Bayo, L.;Alloueche, A.;Olliaro, P.;Milligan, P.;von, S. L.;Pinder, M.	1999	A randomized safety and tolerability trial of artesunate plus sulfadoxine--pyrimethamine versus sulfadoxine-pyrimethamine alone for the treatment of uncomplicated malaria in Gambian children	Transactions of the Royal Society of Tropical Medicine and Hygiene	93	5	543-6	Artemisinin derivatives, such as artesunate, have a short half-life and very rapid anti-malarial activity. Theoretically, using such agents in conjunction with well-established anti-malarial drugs such as sulfadoxine-pyrimethamine may reduce the rate of drug resistance. Such a combination has not previously been used in Africa. We have conducted a pilot safety trial of artesunate (4 mg/kg for 3 d…	10696418	Africa	Gambia
Lim, C. S.;Kim, Y. K.;Lee, K. N.;Kim, M. J.;Kim, K. H.;Kim, D. S.;Strickman, D.	1999	Response to chloroquine of Plasmodium vivax among South Korean soldiers	Annals of tropical medicine and parasitology	93	6	565-8	The response to standard chloroquine treatment was evaluated, by microscopical examination of blood-smears, among 81 soldiers diagnosed with Plasmodium vivax malaria in South Korea in 1996. The smears were prepared pre-treatment and 3, 14 and 28 days after starting chemotherapy. Parasitaemias were determined after staining the smears with Giemsa's stain. Blood samples from the patients who were n…	10707102	Asia	Republic of Korea
Gogtay, N. J.;Desai, S.;Kamtekar, K. D.;Kadam, V. S.;Dalvi, S. S.;Kshirsagar, N. A.	1999	Efficacies of 5- and 14-day primaquine regimens in the prevention of relapses in Plasmodium vivax infections	Annals of tropical medicine and parasitology	93	8	809-12	Vivax malaria accounts for 80% of malaria cases in Mumbai (Bombay) and has high morbidity. In India, the standard treatment to prevent relapses of vivax malaria is a 5-day regimen of primaquine. However, between 1977 and 1997, the efficacy of this treatment declined from approximately 99% to 87%. The efficacy of the 5-day regimen was therefore compared with that of the 14-day regimen currently re…	10715673	Asia	India
McGready, R.;Nosten, F.	1999	The Thai-Burmese border: drug studies of Plasmodium falciparum in pregnancy	Annals of Tropical Medicine and Parasitology	93	1	S19-23	Plasmodium falciparum malaria is increasing world-wide, as is resistance to the available antimalarials. On the Thai-Burmese border this problem is most acute in pregnant women, as options for their treatment are even more restricted because of the unknown effects of antimalarials on the foetus. Presented here are the results of descriptive, clinical, drug studies on quinine, mefloquine and artem…	10715685	Asia	Thailand
Looareesuwan, S.;Wilairatana, P.;Glanarongran, R.;Indravijit, K. A.;Supeeranontha, L.;Chinnapha, S.;Scott, T. R.;Chulay, J. D.	1999	Atovaquone and proguanil hydrochloride followed by primaquine for treatment of Plasmodium vivax malaria in Thailand	Transactions of the Royal Society of Tropical Medicine and Hygiene	93	6	637-40	Chloroquine-resistant Plasmodium vivax malaria has been reported in several geographical areas. The P. vivax life-cycle includes dormant hepatic parasites (hypnozoites) that cause relapsing malaria weeks to years after initial infection. Curative therapy must therefore target both the erythrocytic and hepatic stages of infection. Between July 1997 and June 1998, we conducted an open-label study i…	10717754	Asia	Thailand
Rowland, M.;Durrani, N.	1999	Randomized controlled trials of 5- and 14-days primaquine therapy against relapses of vivax malaria in an Afghan refugee settlement in Pakistan	Transactions of the Royal Society of Tropical Medicine and Hygiene	93	6	641-3	Primaquine is the only drug available that can eliminate hypnozoites from the liver and prevent relapses of vivax malaria. The World Health Organization recommends a course of 14-21 days depending on region and strain. The National Malaria Control and Eradication Programmes of Pakistan and India have adhered to a 5-day course as their standard as it is deemed more practical to implement and becau…	10717755	Asia	Pakistan
Brasseur, P.;Guiguemde, R.;Diallo, S.;Guiyedi, V.;Kombila, M.;Ringwald, P.;Olliaro, P.	1999	Amodiaquine remains effective for treating uncomplicated malaria in west and central Africa	Transactions of the Royal Society of Tropical Medicine and Hygiene	93	6	645-50	Many countries in Africa are now confronted with the dilemma of shifting drug policies for uncomplicated falciparum malaria from chloroquine, which has become largely ineffective, to a new first-line drug and amodiaquine is one of the possible options. A multicentre, open-label randomized controlled trial of amodiaquine 30 mg/kg vs chloroquine 25 mg/kg over 3 days was performed in Senegal, Camero…	10717757	Africa	Multicentred
Li, X.;Li, C.;Che, L.;Liu, X.;Li, Z.;Huang, D.;He, W.;Dao, Q.	1999	Observation on efficacy of artemether compound against vivax malaria	Chinese journal of parasitology & parasitic diseases	17	3	175-7	AIM: To observe the efficacy of artemether compound against vivax malaria. METHODS: Each artemether compound tablet contains 120 mg benflumetolum and 20 mg artemether. 132 patients with vivax malaria were divided into 3 groups. Group A, 36 patients received 8 tablets as an initial dose, followed by 4 tablets daily for 2 days; group B, 41 patients received 8 tablets as an initial dose, followed by…	12563840	Asia	China
von Seidlein, L.;Milligan, P.;Pinder, M.;Bojang, K.;Anyalebechi, C.;Gosling, R.;Coleman, R.;Ude, J. I.;Sadiq, A.;Duraisingh, M.;Warhurst, D.;Alloueche, A.;Targett, G.;McAdam, K.;Greenwood, B.;Walraven, G.;Olliaro, P.;Doherty, T.	2000	Efficacy of artesunate plus pyrimethamine-sulphadoxine for uncomplicated malaria in Gambian children: a double-blind, randomised, controlled trial	Lancet	355	9201	352-7	BACKGROUND: Resistance to cheap effective antimalarial drugs, especially to pyrimethaminesulphadoxine (Fansidar), is likely to have a striking impact on childhood mortality in sub-Sharan Africa. The use of artesunate (artesunic acid) [corrected] in combination with pyrimethamine-sulphadoxine may delay or prevent resistance. We investigated the efficacy, safety, and tolerability of this combined t…	10665554	Africa	Gambia
Ogutu, B. R.;Smoak, B. L.;Nduati, R. W.;Mbori-Ngacha, D. A.;Mwathe, F.;Shanks, G. D.	2000	The efficacy of pyrimethamine-sulfadoxine (Fansidar) in the treatment of uncomplicated Plasmodium falciparum malaria in Kenyan children	Transactions of the Royal Society of Tropical Medicine and Hygiene	94	1	83-4		10748907	Africa	Kenya
de Vries, PJ; Bich, NN; Van, Thien H; Hung, LN; Anh, TK; Kager PA; Heisterkamp SH.	2000	Combinations of artemisinin and quinine for uncomplicated falciparum malaria: efficacy and pharmacodynamics	Antimicrobial agents and chemotherapy	44	5	1302-8	Combinations of artemisinin and quinine for uncomplicated falciparum malaria were studied. A total of 268 patients were randomized to 7 days of quinine at 10 mg/kg of body weight three times a day (Q) or to artemisinin at 20 mg/kg of body weight followed by 3 (AQ3) or 5 (AQ5) days of quinine. Recrudescence rates were 16, 38, and 15% for the Q, AQ3, and AQ5 groups, respectively (P < 0.001). Recrud…	10770766	Asia	Vietnam
Pukrittayakamee, S.;Chantra, A.;Simpson, J. A.;Vanijanonta, S.;Clemens, R.;Looareesuwan, S.;White, N. J.	2000	Therapeutic responses to different antimalarial drugs in vivax malaria	Antimicrobial agents and chemotherapy	44	6	1680-5	The therapeutic responses to the eight most widely used antimalarial drugs were assessed in 207 adult patients with Plasmodium vivax malaria. This parasite does not cause marked sequestration, so parasite clearance can be used as a direct measure of antimalarial activity. The activities of these drugs in descending order were artesunate, artemether, chloroquine, mefloquine, quinine, halofantrine,…	10817728	Asia	Thailand
Adou-Bryn, K. D.;Kouassi, D.;Ouhon, J.;Assoumou, A.;Kone, M.	2000	Clinical trial of amodiaquine in the community of Attecoube (Abidjan, Cote d'Ivoire)(May-December 1955)	Bulletin de la Societe de pathologie exotique	93	2	115-8	A prospective study in the municipality of Attecoube (Abidjan, Cote d'Ivoire) evaluated the sensitivity of P. falciparum to amodiaquine with a posology of 35 mg/kg over 3 days (1st day: 15 mg/kg; 2nd day: 10 mg/kg; 3rd day: 10 mg/kg) as well as its tolerance of this dosage. One hundred five WHO in vivo standard tests were performed over 7 days on subjects aged > 15 years from May to December 1995…	10863615	Africa	Cote d'Ivoire
Noronha, E.;Alecrim, M. G.;Romero, G. A.;Macedo, V.	2000	RIII mefloquine resistance in children with falciparum malaria in Manaus, AM, Brazil	Revista da Sociedade Brasileira de Medicina Tropical	33	2	201-5	We report the occurrence of resistance to mefloquine 20mg/day in 51 children with falciparum malaria treated, at reference center of Manaus, Brazil, from October to December 1997. All children were evaluated at day 3, 5, 7, 14, 21, 28 and 35 of treatment. Clinical and parasitological cure criteria were adopted. The incidence of RIII mefloquine resistance was 5.9% (IC 95% 1.5-17.2). The cure/resis…	10881135	S.America	Brazil
Sowunmi, A.;Fehintola, F. A.;Adedeji, A. A.;Falade, A. G.;Falade, C. O.;Akinyinka, O. O.;Oduola, A. M.	2000	Comparative efficacy of chloroquine plus chlorpheniramine alone and in a sequential combination with sulfadoxine-pyrimethamine, for the treatment of acute, uncomplicated, falciparum malaria in children	Annals of tropical medicine and parasitology	94	3	209-17	One hundred and eight children with acute, symptomatic, uncomplicated, falciparum malaria were randomized to receive chloroquine (for 3 days) plus chlorpheniramine alone (for seven days) (CQ-CP group; N = 55) or, in a sequential treatment, chloroquine plus chlorpheniramine for 3 days followed, on the fourth day, by a single oral dose of sulfadoxine-pyrimethamine (25 mg sulfadoxine/kg) (CQ-CP-SP g…	10884864	Africa	Nigeria
Nwanyanwu, O. C.;Ziba, C.;MacHeso, A.;Kazembe, P.	2000	Efficacy of sulphadoxine-pyrimethamine for acute uncomplicated malaria due to Plasmodium falciparum in Malawian children under five years old	Tropical medicine & international health	5	5	355-8	In 1993, Malawi replaced chloroquine (CQ) with sulphadoxine-pyrimethamine (SP) as its first-line treatment for uncomplicated malaria in children < 5 years of age. To assess the efficacy of SP after 5 years of widespread use, we undertook this study at 7 sites in 6 districts of Malawi. Febrile children < 5 years attending the outpatient clinics of selected hospitals whose parents consented were en…	10886799	Africa	Malawi
Deloron, P.;Mayombo, J.;Le, C. A.;Mezui-Me-Ndong, J.;Bruzi-Baert, C.;Lekoulou, F.;Elissa, N.	2000	Sulfadoxine-pyrimethamine for the treatment of Plasmodium falciparum malaria in Gabonese children	Transactions of the Royal Society of Tropical Medicine and Hygiene	94	2	188-90	Chloroquine can no longer be recommended as the first-line treatment for falciparum malaria in several parts of Africa, given the increasing resistance of Plasmodium falciparum to this drug. The sulfadoxine-pyrimethamine combination (SP) is obviously an alternative candidate, that has already been selected as first-line antimalarial treatment by a few African countries. However, the extent of res…	10897366	Africa	Gabon
Gorissen, E.;Ashruf, G.;Lamboo, M.;Bennebroek, J.;Gikunda, S.;Mbaruku, G.;Kager, P. A.	2000	In vivo efficacy study of amodiaquine and sulfadoxine/ pyrimethamine in Kibwezi, Kenya and Kigoma, Tanzania	Tropical medicine & international health	5	6	459-63	We conducted two randomized clinical trials to determine the in vivo efficacy of amodiaquine and sulfadoxine/pyrimethamine in treating Plasmodium falciparum malaria. Seventy-five patients under the age of 10 years in Kibwezi, Kenya, and 171 patients in Kigoma, Tanzania, were enrolled for treatment. Due to loss of eight patients in Kibwezi and 37 in Kigoma to follow-up, we used best and worst case…	10929148	Africa	Multicentred
Gogtay, N. J.;Desai, S.;Kadam, V. S.;Kamtekar, K. D.;Dalvi, S. S.;Kshirsagar, N. A.	2000	A randomized, parallel-group study in Mumbai (Bombay), comparing chloroquine with chloroquine plus sulfadoxine-pyrimethamine in the treatment of adults with acute, uncomplicated, Plasmodium falciparum malaria	Annals of tropical medicine and parasitology	94	4	309-12	A major problem in the control of malaria is the development of resistance, of the parasites to the existing drugs and of the vectors to insecticides. With few new drugs in the pipeline, in an era of declining resources, it is imperative to make judicious use of the existing antimalarials. In the city of Mumbai, resistance exists to chloroquine (CQ) and to sulfadoxine-pyrimethamine (SP). Use of a…	10945039	Asia	India
Bergonzoli, G.;Rivers, C. J. C.	2000	Therapeutic efficacy of different antimalarial regimens in the Costa Rica-Nicaragua border region	Pan American Journal of Public Health	7	6	366-70	The search for short treatments for malaria is still a goal for many developing countries. The World Health Organization has recommended a three-day treatment with primaquine and quinine, but this treatment is difficult to apply in many rural areas because it requires a malaria technician to stay at least three days in a community. This is very hard when these communities are dispersed and increa…	10949896	S.America	Multicentred
Pukrittayakamee, S.;Chantra, A.;Vanijanonta, S.;Clemens, R.;Looareesuwan, S.;White, N. J.	2000	Therapeutic responses to quinine and clindamycin in multidrug-resistant falciparum malaria	Antimicrobial agents and chemotherapy	44	9	2395-8	Therapeutic responses to clindamycin in combination with quinine were assessed in adult Thai patients with uncomplicated multidrug-resistant Plasmodium falciparum malaria. In total 204 patients were randomized to receive a 7-day oral treatment regimen of quinine (Q(7)) either alone (n = 68), in combination with clindamycin (Q(7)C(7); n = 68), or in combination with tetracycline (Q(7)T(7); n = 68)…	10952585	Asia	Thailand
Ndyomugyenyi, R.;Magnussen, P.	2000	In vivo sensitivity of Plasmodium falciparum to chloroquine and sulfadoxine-pyrimethamine among schoolchildren in rural Uganda: a comparison between 1995 and 1998	Acta tropica	76	3	265-70	Sensitivity of Plasmodium falciparum to chloroquine and sulfadoxine-pyrimethamine was tested among asymptomatic school children in 1995 and 1998 using a modified in vivo test with examination for parasitaemia on day 0, 2 and 7. Sensitivity (S/RI) to chloroquine in 'urban' areas was found in 42% in 1995 and 62% in 1998 with resistance at the RII/RIII level observed in 58 and 38%, respectively (P<0…	10974167	Africa	Multicentred
Singh, R. K.	2000	Emergence of chloroquine-resistant vivax malaria in south Bihar (India)	Transactions of the Royal Society of Tropical Medicine and Hygiene	94	3	327		10975013	Asia	India
Schwartz, E.;Regev-Yochay, G.;Kurnik, D.	2000	Short report: a consideration of primaquine dose adjustment for radical cure of Plasmodium vivax malaria	The American journal of tropical medicine and hygiene	62	3	393-5	Relapse of Plasmodium vivax malaria following standard primaquine dosing has been reported from many areas, and more recently from sub-Saharan Africa. In this report we describe eight episodes (in five patients) of treatment failure in non-immune Israeli travelers returning from Ethiopia. Retrospective calculation of the primaquine dose per kilogram of body weight for 23 treatment courses showed …	11037784	Africa	Travellers
Kshirsagar, N. A.;Gogtay, N. J.;Moorthy, N. S.;Garg, M. R.;Dalvi, S. S.;Chogle, A. R.;Sorabjee, J. S.;Marathe, S. N.;Tilve, G. H.;Bhatt, A. D.;Sane, S. P.;Mull, R.;Gathmann, I.	2000	A randomized, double-blind, parallel-group, comparative safety, and efficacy trial of oral co-artemether versus oral chloroquine in the treatment of acute uncomplicated Plasmodium falciparum malaria in adults in India	The American journal of tropical medicine and hygiene	62	3	402-8	In India, treatment of acute, uncomplicated Plasmodium falciparum malaria is becoming increasingly difficult due to resistance to chloroquine, thus there is a need for new antimalarial drugs. CGP 56697 (co-artemether), a new drug, is a combination of artemether and lumefantrine in a single oral formulation (one tablet = 20 mg of artemether plus 120 mg of lumefantrine). In a double-blind study, 17…	11037786	Asia	India
Bijl, H. M.;Kager, J.;Koetsier, D. W.;van, d. W. T. S.	2000	Chloroquine- and sulfadoxine-pyrimethamine-resistant Falciparum malaria in vivo - a pilot study in rural Zambia	Tropical medicine & international health	5	10	692-5	BACKGROUND: Chloroquine (CQ) and Sulfadoxine-Pyrimethamine (SP) are the predominantly used antimalarials in Zambia and other parts of East Africa, but increasing resistance of P. falciparum is a major concern. METHODS: Seventy consecutive patients with uncomplicated falciparum malaria were enrolled. In 43 patients, no prior CQ use could be demonstrated by history and urianalysis (qualitative test…	11044263	Africa	Zambia
Ringwald, P.;Same, E. A.;Keundjian, A.;Kedy, M. D.;Basco, L. K.	2000	Chemoresistance of P. falciparum in urban areas of Yaounde, Cameroon. Part 1: Surveillance of in vitro and in vivo resistance of Plasmodium falciparum to chloroquine from 1994 to 1999 in Yaounde, Cameroon	Tropical medicine & international health	5	9	612-9	Chloroquine is indicated for the first-line treatment of uncomplicated malaria in most African countries. However, the spread of chloroquine-resistant Plasmodium falciparum requires periodic monitoring. Between 1994 and 1999, we studied the evolution of chloroquine resistance in adults (aged > 15 years) and children aged 5-15 years by using tests of therapeutic efficacy and in vitro assays. Respo…	11044275	Africa	Cameroon
Ringwald, P.;Keundjian, A.;Same, E. A.;Basco, L. K.	2000	Chemoresistance of Plasmodium falciparum in the urban region of Yaounde, Cameroon. Part 2: Evaluation of the efficacy of amodiaquine and sulfadoxine-pyrimethamine combination in the treatment of uncomplicated Plasmodium falciparum malaria in Yaounde, Cameroon	Tropical medicine & international health	5	9	620-7	The spread of chloroquine resistance or its stabilization at a high level calls for a change in the therapeutic strategy, including a possible replacement of chloroquine. We assessed and compared the efficacy of amodiaquine and sulfadoxine-pyrimethamine in Yaounde. Of 140 adults and children > 5 years enrolled in the study, 59 in the amodiaquine and 58 in the sulfadoxine-pyrimethamine treatment g…	11044276	Africa	Cameroon
van Vugt, M;Looareesuwan, S.;Wilairatana, P.;McGready, R.;Villegas, L.;Gathmann, I.;Mull, R.;Brockman, A.;White, N. J.;Nosten, F.	2000	Artemether-lumefantrine for the treatment of multidrug-resistant falciparum malaria	Transactions of the Royal Society of Tropical Medicine and Hygiene	94	5	545-8	The efficacy and safety of the 6-dose regimen of artemether-lumefantrine were assessed in an open randomized trial in children and adults presenting with acute, uncomplicated Plasmodium falciparum malaria in Thailand between November 1997 and March 1998. 200 patients were enrolled in 2 centres: 150 received artemether-lumefantrine (i.e., a median total dose of 9.6 mg/kg [interquartile range 8.7-1…	11132386	Asia	Thailand
Nandi, J.;Sharma, S. N.	2000	Efficacy of chloroquine in febrile Plasmodium falciparum infected children in Mewat region of Haryana	The Journal of communicable diseases	32	2	137-43	During 1996, Mewat region of Gurgaon district in Haryana experienced high incidence of Plasmodium falciparum malaria, assuming epidemic proportion in large number of villages affected by floods. Mortality due to fever was also high. In vivo 7 days study amongst 32 febrile P. falciparum infected children of 1 to 14 years age group in flood affected villages of Ferozpur Jhirka Community Health Cent…	11198399	Asia	India
McGready, R.;Brockman, A.;Cho, T.;Cho, D.;van, V. M.;Luxemburger, C.;Chongsuphajaisiddhi, T.;White, N. J.;Nosten, F.	2000	Randomized comparison of mefloquine-artesunate versus quinine in the treatment of multidrug-resistant falciparum malaria in pregnancy	Transactions of the Royal Society of Tropical Medicine and Hygiene	94	6	689-93	Since no effective malaria prevention measures have been identified for pregnant women living on the western border of Thailand, prompt diagnosis and efficient treatment are paramount, although drug resistance in Plasmodium falciparum has narrowed the treatment options. An open randomized comparison of supervised quinine (10 mg salt/kg every 8 h) for 7 days (Q7) versus mefloquine 25 mg base/kg (t…	11198658	Asia	Thailand
Villalobos-Salcedo, J. M.;Tada, M. S.;Kimura, E.;Menezes, M. J.;Pereira, d. S. L. H.	2000	In-vivo sensitivity of Plasmodium vivax isolates from Rond nia (western Amazon region, Brazil) to regimens including chloroquine and primaquine	Annals of tropical medicine and parasitology	94	8	749-58	Seventy-nine adults with Plasmodium vivax malaria, from the Porto Velho area of Rond nia (western Amazon region, Brazil), gave informed consent to participate in a blind, clinical study of two regimens of treatment with chloroquine (CQ) and primaquine. The effectiveness of the 'classical' regimen (CQ for 3 days, followed by primaquine for 14 days) was compared with that of a 'short' regimen in wh…	11214093	S.America	Brazil
Taylor, W. R.;Doan, H. N.;Nguyen, D. T.;Tran, T. U.;Fryauff, D. J.;Gomez-Saladin, E.;Kain, K. C.;Le, D. C.;Baird, J. K.	2000	Assessing drug sensitivity of Plasmodium vivax to halofantrine or choroquine in southern, central Vietnam using an extended 28-day in vivo test and polymerase chain reaction genotyping	The American journal of tropical medicine and hygiene	62	6	693-7	Chloroquine-resistant Plasmodium vivax malaria is emerging in Oceania, Asia, and Latin America. We assessed the drug sensitivity of P. vivax to chloroquine or halofantrine in two villages in southern, central Vietnam. This area has chloroquine-resistant Plasmodium falciparum but no documented chloroquine-resistant P. vivax. Standard dose chloroquine (25 mg/kg, over 48 hours) or halofantrine (8 mg…	11304056	Asia	Vietnam
Krudsood, S.;Silachamroon, U.;Wilairatana, P.;Singhasivanon, P.;Phumratanaprapin, W.;Chalermrut, K.;Phophak, N.;Popa, C.	2000	A randomized clinical trial of combinations of artesunate and azithromycin for treatment of uncomplicated Plasmodium falciparum malaria in Thailand	The Southeast Asian journal of tropical medicine and public health	31	4	801-7	Recently, a combination of artesunate and mefloquine has proved effective, although is contraindicated in early pregnancy and young children. Azithromycin, a widely used antibiotic and has antimalarial effects, replace mefloquine as a new alternative antimalarial regimen. Two hundred and two uncomplicated falciparum malaria patients were randomly assigned to 1 of 3 regimens. Patients in group I (…	11414432	Asia	Thailand
Bouchaud, O.;Monlun, E.;Muanza, K.;Fontanet, A.;Scott, T.;Goetschel, A.;Chulay, J. D.;Le, B. J.;Danis, M.;Le, B. M.;Coulaud, J. P.;Gentilini, M.	2000	Atovaquone plus proguanil versus halofantrine for the treatment of imported acute uncomplicated Plasmodium falciparum malaria in non-immune adults: a randomized comparative trial	The American journal of tropical medicine and hygiene	63	2011-06-05	274-9	In endemic zones, the atovaquone-proguanil (AP) combination is well tolerated and effective in treating acute, uncomplicated malaria. Trials involving non-immune patients are lacking, however. We conducted a randomized, multicenter open-label trial to determine the efficacy and tolerability of the AP combination (1,000 mg + 400 mg once daily for 3 days) in comparison with halofantrine (HF) (1,500…	11421377	Travellers	Travellers
Raharimalala, A. L.;Randrianarivelojosia, M.;Randriamanantena, A.;Ranarivelo, L. A.;Jaureguiberry, S.;Rason, M. A.;Rakotomalala, E.;Ariey, F.	2000	Chemosensitivity of Plasmodium falciparum in Sainte Marie island, east coast of Madagascar: in vivo and in vitro studies	Archives de l'Institut Pasteur de Madagascar	66	2011-02-01	26-31	In order to document the evolution of the chemoresistance of Plasmodium falciparum to chloroquine in Madagascar, a study was carried out in Sainte-Marie island located at 6 km on the eastern border of the country. Symptomatic malaria patients who satisfied criteria for resistance testing, were recruited by a process of passive case detection at two clinics. These patients were enrolled in a sensi…	12463030	Africa	Madagascar
Sun, Z. W.;Shan, C. Q.;Li, G. F.;Ding, D. B.;Liu, G. Y.;Wang, J. Y.;Jiao, X. Q.	2000	Clinical comparative trial of co-artemether and benflumetol (two formulations) in the treatment of falciparum malaria	Chinese journal of parasitology & parasitic diseases	18	3	159-61	OBJECTIVE: To observe the efficacy and safety of co-artemether and one of its components benflumetol (two formulations) in the treatment of patients with falciparum malaria. METHODS: Adopting double-blining, randomization and comparative method, all patients were hospitalized and observed for 28 days after treatment. RESULTS: Of 150 patients, 51 patients were treated with co-artemether group(A), …	12567694	Asia	China
Blair S, Lacharme LL, Fonseca JC, Tobón A.	2001	[Resistance of Plasmodium falciparum to 3 antimalarials in Turbo (Antioquia, Colombia), 1998]	Pan American Journal of Public Health	9	1	23-29	In 1998 we determined in vivo and in vitro the frequency and the degree of resistance of Plasmodium falciparum to the three antimalarials (chloroquine, amodiaquine, and sulfadoxine/pyrimethamine) most utilized in the municipality of Turbo (in the area of Urabá, Antioquia, Colombia), in a sample representative of the population with malaria. We carried out clinical and parasitological analyses ove…	9705400	S.America	Colombia
Parola, P.;Ranque, S.;Badiaga, S.;Niang, M.;Blin, O.;Charbit, J. J.;Delmont, J.;Brouqui, P.	2001	Controlled trial of 3-day quinine-clindamycin treatment versus 7-day quinine treatment for adult travelers with uncomplicated falciparum malaria imported from the tropics	Antimicrobial agents and chemotherapy	45	3	932-5	We conducted a randomized, double-blind, placebo-controlled trial to compare a 3-day quinine-clindamycin regimen (group QC) with a 7-day quinine regimen (group Q) for the treatment of uncomplicated Plasmodium falciparum malaria in travelers returning from the tropics. A total of 55 and 53 patients in groups Q and QC were analyzed, respectively. Adverse effects were similar in both groups, althoug…	11181383	Travellers	Travellers
von Seidlein, L.;Jawara, M.;Coleman, R.;Doherty, T.;Walraven, G.;Targett, G.	2001	Parasitaemia and gametocytaemia after treatment with chloroquine, pyrimethamine/sulfadoxine, and pyrimethamine/sulfadoxine combined with artesunate in young Gambians with uncomplicated malaria	Tropical medicine & international health	6	2	92-8	As part of a study to assess the infectivity of gametocytes after treatment with four antimalarial regimens, the efficacy of each treatment was also determined. From September to December 1998, 598 children with uncomplicated malaria were treated; 135 received chloroquine (CQ) alone, 276 received pyrimethamine/sulfadoxine (Fansidar, PSD) alone, 113 received PSD with a single dose of artesunate (P…	11251903	Africa	Gambia
Kamya, M. R.;Dorsey, G.;Gasasira, A.;Ndeezi, G.;Babirye, J. N.;Staedke, S. G.;Rosenthal, P. J.	2001	The comparative efficacy of chloroquine and sulfadoxine-pyrimethamine for the treatment of uncomplicated falciparum malaria in Kampala, Uganda	Transactions of the Royal Society of Tropical Medicine and Hygiene	95	1	50-5	Chloroquine (CQ) remains the first-line treatment for uncomplicated malaria in much of Africa despite the growing problem of resistance to this drug. Sulfadoxine-pyrimethamine (SP) is often used after CQ treatment failure and has replaced CQ as the first-line treatment in parts of Africa. To compare the efficacy of these 2 regimens, we evaluated, in March-August 1999, clinical and parasitological…	11280066	Africa	Uganda
Taylor, W. R.;Widjaja, H.;Richie, T. L.;Basri, H.;Ohrt, C.;Tjitra;Taufik, E.;Jones, T. R.;Kain, K. C.;Hoffman, S. L.	2001	Chloroquine/doxycycline combination versus chloroquine alone, and doxycycline alone for the treatment of Plasmodium falciparum and Plasmodium vivax malaria in northeastern Irian Jaya, Indonesia	The American journal of tropical medicine and hygiene	64	2011-06-05	223-8	Combination therapy is one method of overcoming the global challenge of drug-resistant Plasmodium falciparum malaria. We conducted a hospital-based 28-day in vivo test comparing chloroquine/doxycycline to chloroquine or doxycycline alone for treating P. falciparum and Plasmodium vivax malaria in Irian Jaya, Indonesia. Eighty-nine patients with uncomplicated falciparum malaria were randomized to s…	11463107	Asia	Indonesia
Plowe, C. V.;Doumbo, O. K.;Djimde, A.;Kayentao, K.;Diourte, Y.;Doumbo, S. N.;Coulibaly, D.;Thera, M.;Wellems, T. E.;Diallo, D. A.	2001	Chloroquine treatment of uncomplicated Plasmodium falciparum malaria in Mali: parasitologic resistance versus therapeutic efficacy	The American journal of tropical medicine and hygiene	64	2011-06-05	242-6	Whether and when to replace chloroquine with other antimalarial drugs is an urgent public health question in much of Africa, where Plasmodium falciparum, which is increasingly resistant to chloroquine, continues to kill millions each year. Antimalarial drug efficacy has traditionally been measured as parasitologic resistance, but recent guidelines use both clinical and parasitologic criteria to m…	11463110	Africa	Mali
Lefevre, G.;Looareesuwan, S.;Treeprasertsuk, S.;Krudsood, S.;Silachamroon, U.;Gathmann, I.;Mull, R.;Bakshi, R.	2001	A clinical and pharmacokinetic trial of six doses of artemether-lumefantrine for multidrug-resistant Plasmodium falciparum malaria in Thailand	The American journal of tropical medicine and hygiene	64	2011-06-05	247-56	The efficacy-safety and pharmacokinetics of the six-dose regimen of artemether-lumefantrine (Coartem/Riamet; Novartis Pharma AG, Basel, Switzerland) were assessed in a randomized trial in 219 patients (> or = 12 years old) with acute, uncomplicated Plasmodium falciparum malaria in Thailand. One hundred and sixty-four patients received artemether-lumefantrine and 55 received the standard treatment…	11463111	Asia	Thailand
Huong, N. M.;Hewitt, S.;Davis, T. M.;Dao, L. D.;Toan, T. Q.;Kim, T. B.;Hanh, N. T.;Phuong, V. N.;Nhan, D. H.;Cong, L. D.	2001	Resistance of Plasmodium falciparum to antimalarial drugs in a highly endemic area of southern Viet Nam: a study in vivo and in vitro	Transactions of the Royal Society of Tropical Medicine and Hygiene	95	3	325-9	To assess the antimalarial sensitivity of Plasmodium falciparum in vivo and in vitro in a highly endemic area of southern Viet Nam, a field study was conducted (in 1999) at a rubber plantation in Binh Phuoc Province north of Ho Chi Minh City. Fifty patients were treated with either artesunate (4 mg/kg on day 0, then 2 mg/kg on day 1 to 4) or mefloquine (10 mg/kg at 0 h, then 5 mg/kg at 6 h), and …	11491008	Asia	Vietnam
Llanos-Cuentas, A.;Campos, P.;Clendenes, M.;Canfield, C. J.;Hutchinson, D. B.	2001	Atovaquone and proguani hydrochloride compared with chloroquine or pyrimethamine/sulfodaxine for treatment of acute Plasmodium falciparum malaria in Peru	The Brazilian journal of infectious diseases : an official publication of the Brazilian Society of Infectious Diseases	5	2	67-72	The efficacy and safety of a fixed-dose combination of atovaquone and proguanil hydrochloride (Malarone) were compared with chloroquine or pyrimethamine/sulfadoxine in patients with acute falciparum malaria in northern Peru. Patients were initially randomized to receive 1,000 mg atovaquone and 400 mg proguanil hydrochloride daily for 3 days (n=15) or 1,500 mg chloroquine (base) over a 3 day perio…	11493411	S.America	Peru
Staedke, S. G.;Kamya, M. R.;Dorsey, G.;Gasasira, A.;Ndeezi, G.;Charlebois, E. D.;Rosenthal, P. J.	2001	Amodiaquine, sulfadoxine/pyrimethamine, and combination therapy for treatment of uncomplicated falciparum malaria in Kampala, Uganda: a randomised trial	Lancet	358	9279	368-74	BACKGROUND: Increasing Plasmodium falciparum resistance to chloroquine in sub-Saharan Africa necessitates use of alternative antimalarial agents. Affordable alternative treatments include sulfadoxine/pyrimethamine and amodiaquine. Combination of antimalarial agents can increase therapeutic efficacy and delay emergence of drug resistance. We compared the efficacy of sulfadoxine/pyrimethamine, amod…	11502317	Africa	Uganda
Soto, J.;Toledo, J.;Gutierrez, P.;Luzz, M.;Llinas, N.;Cedeno, N.;Dunne, M.;Berman, J.	2001	Plasmodium vivax clinically resistant to chloroquine in Colombia	The American journal of tropical medicine and hygiene	65	2	90-3	Chloroquine-resistant Plasmodium vivax has been the subject of numerous case reports and prospective studies from Oceania and Asia. In contrast, only case reports exist from the Americas. We performed a prospective study with 28-day follow-up of clinical responses to chloroquine in 2 P. vivax-endemic regions of Colombia. Three (11%) of 27 patients failed to respond to treatment with the standard …	11508397	S.America	Colombia
Adak, T.;Valecha, N.;Sharma, V. P.	2001	Plasmodium vivax polymorphism in a clinical drug trial	Clinical and diagnostic laboratory immunology	8	5	891-4	Data from a double-blind randomized clinical drug trial were analyzed to find the comparative responses of two antirelapse drugs, bulaquine and primaquine, against different relapsing forms of Plasmodium vivax infection. A 1-year follow-up study strongly suggests that the duration of preerythrocytic development of P. vivax is a polymorphic characteristic, exhibited by two strains of hypnozoites r…	11527798	Asia	India
Athan, E.;Durrheim, D. N.;Barnes, K.;Mngomezulu, N. M.;Mabuza, A.;Govere, J.	2001	Effectiveness of short-course quinine and single-dose sulfadoxine-pyrimethamine in the treatment of Plasmodium falciparum malaria in Mpumalanga Province, South Africa	South African medical journal	91	7	592-4	INTRODUCTION: Quinine therapy for 7 days remains the mainstay for treating hospitalised malaria cases in South Africa. However, limited resources, including available beds and staff, often result in early discharge of non-severe cases, with quinine tablets for outpatient use. The effectiveness of shorter course quinine therapy coupled with a long-acting antimalarial drug has never been establishe…	11544977	Africa	South Africa
Krudsood, S.;Singhasivanon, P.;Silachamroon, U.;Treeprasertsuk, S.;Kaivipakbanyai, W.;Chalermrut, K.;Phophak, N.;Horton, J.;Kyle, D.;Looareesuwan, S.	2001	Clinical trial of halofantrine with modified doses for treatment of malaria in the hospital for tropical diseases	The Southeast Asian journal of tropical medicine and public health	32	2	255-61	The spread of falciparum malaria resistant to chloroquine all over Southeast Asian continent has led to increasing use of alternative antimalarial drugs. Halofantrine has been shown to be effective against multidrug resistant Plasmodium falciparum. One hundred and twenty falciparum malaria cases were randomly assigned to one of three different halofantrine regimes. Group I (HA1) received 500 mg t…	11556573	Asia	Thailand
Abdon, N. P.;Pinto, A. Y.;das, S. R. S.;de, S. J. M.	2001	Assessment of the response to reduced treatment schemes for vivax malaria	Revista da Sociedade Brasileira de Medicina Tropical	34	4	343-8	Relapses may occur with long standard treatment of vivax malaria, and these are caused by incomplete patient's compliance. The use of reduced schedules may further better patient compliance, while maintaining the same efficacy, tolerance and minimal adverse reactions. The objective of this study was to test two schedules with reduced doses of chloroquine for vivax malaria and comparing these with…	11562727	S.America	Brazil
Elkheir, H. K.;Elkarim, E. F.;Eltayeb, I. B.;Elkadaru, A. E.;Babiker, H. A.;Ibrahim, A. M.	2001	Efficacy of Sulphadoxine and Pyrimethamine, Doxycycline and their combination in the treatment of chloroquine resistant Falciparum Malaria	Saudi medical journal	22	8	690-3	OBJECTIVE: The present in vivo study evaluates the efficacy of sulphadoxine/pyrimethamine, doxycycline and their combination in the treatment of Sudanese patients infected by chloroquine resistant falciparum malaria. METHODS: Febrile patients with positive blood smears of Plasmodium falciparum were given chloroquine 25mg-base/kg body weight and followed up for 3 days. Patients with recrudescence …	11573114	Africa	Sudan
Asthana, O. P.;Srivastava, J. S.;Kamboj, V. P.;Valecha, N.;Sharma, V. P.;Gupta, S.;Pande, T. K.;Vishwanathan, K. A.;Mahapatra, K. M.;Nayak, N. C.;Mahapatra, P. K.;Mahanta, J.;Srivastava, V. K.;Vasdev;Singh, N.;Shukla, M. M.;Balsara, A. B.;Mishra, S. K.;Satpathy, S. K.;Mohanty, S.;Dash, B.	2001	A multicentric study with arteether in patients of uncomplicated falciparum malaria	The Journal of the Association of Physicians of India	49		692-6	Two hundred and sixty seven patients of uncomplicated P. falciparum malaria completed study in a multicentric phase III clinical trial of Arteether. Arteether was given intramuscularly in a dose of 150 mg daily for three consecutive days. Each patient was followed upto 28 days of alpha, beta arteether therapy. The cure rate was 97% with fever clearance time between 1-7 days (24-168 hours) and par…	11573553	Asia	Multicentred
Mutabingwa, T. K.;Maxwell, C. A.;Sia, I. G.;Msuya, F. H.;Mkongewa, S.;Vannithone, S.;Curtis, J.;Curtis, C. F.	2001	A trial of proguanil-dapsone in comparison with sulfadoxine-pyrimethamine for the clearance of Plasmodium falciparum infections in Tanzania	Transactions of the Royal Society of Tropical Medicine and Hygiene	95	4	433-8	Considerable levels of resistance to sulfadoxine-pyrimethamine (SP) have been reported in Plasmodium falciparum in north-eastern Tanzania, and the identification of a suitable antimalarial to replace SP is now a high priority. We conducted a trial in July 2000 to determine the efficacy of proguanil (PG) plus dapsone (DS), compared with that of SP, for the treatment of asymptomatic falciparum infe…	11579891	Africa	Tanzania
Sowunmi, A.;Ayede, A. I.;Falade, A. G.;Ndikum, V. N.;Sowunmi, C. O.;Adedeji, A. A.;Falade, C. O.;Happi, T. C.;Oduola, A. M.	2001	Randomized comparison of chloroquine and amodiaquine in the treatment of acute, uncomplicated, Plasmodium falciparum malaria in children	Annals of tropical medicine and parasitology	95	6	549-58	The increasing resistance of Plasmodium falciparum to chloroquine (CQ) has created an urgent need for the evaluation of alternative, effective, safe, cheap, readily available and affordable antimalarial treatments. In the present study, the efficacy of amodiaquine (AQ) in the treatment of acute, symptomatic, uncomplicated, P. falciparum malaria was compared with that of CQ, each drug being given …	11672461	Africa	Nigeria
Guiyedi, V.;Koko, J.;Bouyou, A. M.;Mabika, M. M.;Matsiegui, P. B.;Traore, B.;Kombila, M.	2001	Evaluation of efficacy and tolerance of amodiaquine versus chloroquine in the treatment of uncomplicated malaria outbreak in children of Gabon	Bulletin de la Societe de pathologie exotique	94	3	253-7	We conducted a prospective study from September 1997 to January 1998 in Libreville (Gabon). Fifty-three (53) children with uncomplicated P. falciparum malaria were included and divided into two groups. The first group (27 patients) was treated with amodiaquine and the second (26 patients) with chloroquine. The efficacy and tolerance of amodiaquine 30 mg/kg base over 3 days (10 mg/kg daily) and ch…	11681222	Africa	Gabon
Tjitra, E.;Suprianto, S.;Currie, B. J.;Morris, P. S.;Saunders, J. R.;Anstey, N. M.	2001	Therapy of uncomplicated falciparum malaria: a randomized trial comparing artesunate plus sulfadoxine-pyrimethamine versus sulfadoxine-pyrimethamine alone in Irian Jaya, Indonesia	The American journal of tropical medicine and hygiene	65	4	309-17	Combining artesunate with existing antimalarial drugs may improve cure rates, delay emergence of resistance, and reduce transmission. We performed a randomized comparative trial to quantify the effect of adding artesunate to sulfadoxine-pyrimethamine in the treatment of uncomplicated falciparum malaria in Indonesia. Using a modified 1997 World Health Organization protocol for assessment of therap…	11693875	Asia	Indonesia
Pukrittayakamee, S.;Clemens, R.;Chantra, A.;Nontprasert, A.;Luknam, T.;Looareesuwan, S.;White, N. J.	2001	Therapeutic responses to antibacterial drugs in vivax malaria	Transactions of the Royal Society of Tropical Medicine and Hygiene	95	5	524-8	Some antibacterial drugs have antimalarial activity that can be exploited for the prevention or treatment of malaria. Monotherapy with tetracycline, doxycycline, clindamycin or azithromycin was assessed in 1995-98 in 92 adult patients in Thailand with Plasmodium vivax malaria. All patients recovered following treatment and the early therapeutic responses were similar among the 4 groups. The overa…	11706666	Asia	Thailand
McGready, R.;Cho, T.;Keo, N. K.;Thwai, K. L.;Villegas, L.;Looareesuwan, S.;White, N. J.;Nosten, F.	2001	Artemisinin antimalarials in pregnancy: a prospective treatment study of 539 episodes of multidrug-resistant Plasmodium falciparum	Clinical infectious diseases	33	12	2009-16	The emergence and spread of multidrug-resistant Plasmodium falciparum compromises the treatment of malaria, especially during pregnancy, where the choice of antimalarials is already limited. Artesunate (n=528) or artemether (n=11) was used to treat 539 episodes of acute P. falciparum malaria in 461 pregnant women, including 44 first-trimester episodes. Most patients (310 [57.5%]) received re-trea…	11712093	Asia	Thailand
Duarte, E. C.;Pang, L. W.;Ribeiro, L. C.;Fontes, C. J.	2001	Association of subtherapeutic dosages of a standard drug regimen with failures in preventing relapses of vivax malaria	The American journal of tropical medicine and hygiene	65	5	471-6	This study evaluated the cure rate of the standard recommended regimen for Plasmodium vivax malaria in Brazil and assessed risk factors for failures. Fifty patients with vivax malaria given supervised medical treatment (standard dose of chloroquine: total dose = 1.5 g over a three-day period plus primaquine: total dose = 210 mg over a 14-day period) were followed for six months in a non-endemic a…	11716100	S.America	Brazil
Trung, T. N.;Davis, T. M.;Hewitt, S.;Thuan, L. K.;Quang, H. H.;Anh, C. V.;Thuy, P. T.;Thoa, N. T.;Tuan, N. T.;Hang, N. T.;Giang, L. T.	2001	Treatment of falciparum malaria in Vietnamese children: the need for combination therapy and optimized dosage regimens	Annals of tropical paediatrics	21	4	307-12	To assess the in vivo sensitivity of Plasmodium falciparum to mefloquine and artesunate in a hyperendemic area of southern Viet Nam, we studied 41 children and 21 adults from a remote commune who had uncomplicated falciparum malaria without previous treatment. Patients were randomly allocated to artesunate (4 mg/kg on day 0 and 2 mg/kg on days 1-4) or mefloquine (10 mg/kg followed by 5 mg/kg at 6…	11732148	Asia	Vietnam
Wang, W.;Yang, W.;Micha, S. T.	2001	Efficacy of dihydroartemisinin-mefloquine on acute uncomplicated falciparum malaria	Chinese Medical Journal	114	6	612-3	OBJECTIVE: To evaluate the clinical efficacy of dihydroartemisinin-mefloquine on acute uncomplicated falciparum malaria. METHODS: Fifty-four patients with symptomatic falciparum malaria were allocated to receive oral dihydroartemisinin at a single dose of 120 mg on day 1, followed by mefioquine, 750 mg and 500 mg on days 2 and 3, respectively. Follow-up was performed on days 1, 2, 3, 4, 7, 14, 21…	11780437	Asia	Equatorial Guinea
Dua, V. K.;Sharma, V. P.	2001	Plasmodium vivax relapses after 5 days of primaquine treatment, in some industrial complexes of India	Annals of tropical medicine and parasitology	95	7	655-9	In an investigation of relapse patterns, 5541 cases of Plasmodium vivax malaria, from four major industrial complexes, each received at least one, 5-day course of primaquine (at 15 mg/day). Any subject relapsing was retreated with the same course. Overall, 511 (9.2%) of the P. vivax cases relapsed after the first course and 99 (1.78%), 25 (0.45) and three (0.05%) cases relapsed two, three and fou…	11784418	Asia	India
Ghalib, H. W.;Al-Ghamdi, S.;Akood, M.;Haridi, A. E.;Ageel, A. A.;Abdalla, R. E.	2001	Therapeutic efficacy of chloroquine against uncomplicated, Plasmodium falciparum malaria in south-western Saudi Arabia	Annals of tropical medicine and parasitology	95	8	773-9	The results of annual random screening indicated that Plasmodium falciparum strains showing chloroquine (CQ) resistance in vitro became increasingly common in the Jazan region of south-western Saudi Arabia between 1986 and 1998 (chi(2) for trend = 50.027; P < 0.001). This worrying trend and the emergence of a micro-epidemic in 1997-1998 prompted an assessment of the therapeutic efficacy of CQ aga…	11784431	Asia	Saudi Arabia
MacArthur, J.;Stennies, G. M.;Macheso, A.;Kolczak, M. S.;Green, M. D.;Ali, D.;Barat, L. M.;Kazembe, P. N.;Ruebush, T. K., 2nd	2001	Efficacy of mefloquine and sulfadoxine-pyrimethamine for the treatment of uncomplicated Plasmodium falciparum infection in Machinga District, Malawi, 1998	The American journal of tropical medicine and hygiene	65	6	679-84	In response to the spread of chloroquine-resistant Plasmodium falciparum, Malawi changed its first-line antimalarial drug in 1993 from chloroquine to sulfadoxine-pyrimethamine (SP). Surveillance data has suggested that resistance to SP may be increasing. We compared the efficacy of SP with a potential successor, mefloquine (MQ). By use of a modified World Health Organization in vivo protocol, chi…	11791956	Africa	Malawi
Giao, P. T.;Binh, T. Q.;Kager, P. A.;Long, H. P.;Van, T. N.;Van, N. N.;de, V. P. J.	2001	Artemisinin for treatment of uncomplicated falciparum malaria: is there a place for monotherapy?	The American journal of tropical medicine and hygiene	65	6	690-5	The efficacy of artemisinin monotherapy was studied in 227 patients with uncomplicated falciparum malaria. They all received artemisinin at t = 0 hr, t = 8 hr, and thereafter once daily; treatment was extended at random until they had taken either 5 days of artemisinin followed by 2 days of placebo (A5), or 7 days (A7) of artemisinin. The adult artemisinin dose was 500 mg; children aged < 15 year…	11791958	Asia	Vietnam
Bounyasong, S.	2001	Randomized trial of artesunate and mefloquine in comparison with quinine sulfate to treat P. falciparum malaria pregnant women	Journal of the Medical Association of Thailand	84	9	1289-99	To compare the effectiveness and safety of quinine sulfate and artesunate with mefloquine for treating second trimester pregnancy in women who suffered from Plasmodium falciparum malaria. The prospective study was done in Srisangwal Hospital, Mae Hong Son, Thailand. Sixty, second to third trimester pregnant patients with P. falciparum infection, were recruited at random. They received either quin…	11800303	Asia	Thailand
McGready, R.;Cho, T.;Samuel;Villegas, L.;Brockman, A.;van, V. M.;Looareesuwan, S.;White, N. J.;Nosten, F.	2001	Randomized comparison of quinine-clindamycin versus artesunate in the treatment of falciparum malaria in pregnancy	Transactions of the Royal Society of Tropical Medicine and Hygiene	95	6	651-6.	In areas where multidrug-resistant Plasmodium falciparum (MDR-Pf) is prevalent, only quinine is known to be safe and effective in pregnant women. On the western border of Thailand, 7 days of supervised quinine (30 mg/kg daily) cures two-thirds of P. falciparum-infected women in the 2nd and 3rd trimesters of pregnancy. Artesunate is effective against MDR-Pf and the limited data on its use in pregn…	11816439	Asia	Thailand
Omar, S. A.;Bakari, A.;Owiti, A.;Adagu, I. S.;Warhurst, D. C.	2001	Co-trimoxazole compared with sulfadoxine-pyrimethamine in the treatment of uncomplicated malaria in Kenyan children	Transactions of the Royal Society of Tropical Medicine and Hygiene	95	6	657-60	Sulfadoxine-pyrimethamine (SP) and co-trimoxazole were both effective in reducing fever, clearing parasitaemia and improving anaemia in children aged < 5 years with uncomplicated malaria in 2 Kenyan endemic sites, Oyugis in the west and Tiwi on the coast. We compared the efficacy of these 2 regimens (in May-July 1998) by evaluating clinical and parasitological responses over 14 days. The combined…	11816440	Africa	Kenya
Rahman, M. R.;Paul, D. C.;Rashid, M.;Ghosh, A.;Bangali, A. M.;Jalil, M. A.;Faiz, M. A.	2001	A randomized controlled trial on the efficacy of alternative treatment regimens for uncomplicated falciparum malaria in a multidrug-resistant falciparum area of Bangladesh--narrowing the options for the National Malaria Control Programme?	Transactions of the Royal Society of Tropical Medicine and Hygiene	95	6	661-7	We performed an open, randomized chemotherapy trial comparing the recommended first-, second- and third-line drug regimens, as well as mefloquine, for uncomplicated falciparum malaria in Bangladesh in 1996-97. The regimens were chloroquine for 3 days (CQ, Group I), quinine sulphate for 3 days followed by single-dose sulfadoxine-pyrimethamine (Q3 + SP, Group II), quinine for 7 days (Q7, Group III)…	11816441	Asia	Bangladesh
Mabuza, A.;Govere, J.;Durrheim, D.;Mngomezulu, N.;Bredenkamp, B.;Barnes, K.;Sharp, B.	2001	Therapeutic efficacy of sulfadoxine-pyrimethamine in uncomplicated Plasmodium falciparum malaria 3 years after introduction in Mpumalanga	South African medical journal	91	11	975-8	OBJECTIVES: To assess therapeutic efficacy of sulfadoxine-pyrimethamine (SP) in treatment of uncomplicated Plasmodium falciparum malaria 3 years after introduction in Mpumalanga, South Africa. SETTING: Tonga district with a population of 116,418 and subject to seasonal malaria, with an average annual incidence of 3,200 cases. SUBJECTS: One hundred and nineteen malaria patients presenting to a sen…	11847920	Africa	South Africa
Buchachart, K.;Krudsood, S.;Singhasivanon, P.;Treeprasertsuk, S.;Phophak, N.;Srivilairit, S.;Chalermrut, K.;Rattanapong, Y.;Supeeranuntha, L.;Wilairatana, P.;Brittenham, G.;Looareesuwan, S.	2001	Effect of primaquine standard dose (15 mg/day for 14 days) in the treatment of vivax malaria patients in Thailand	The Southeast Asian journal of tropical medicine and public health	32	4	720-6	Primaquine (8-aminoquinoline), the only effective drug to prevent relapses of the persistent liver forms of Plasmodium vivax and Plasmodium ovale, can induce hemolytic anemia in patients with glucose-6-phosphate dehydrogenase (G6PD) deficiency. The severity varies considerably among affected individuals. Three hundred and sixty-four Plasmodium vivax cases (342 G6PD-normal and 22 G6PD-deficient) w…	12041544	Asia	Thailand
Huang, J. R.;Gao, Y. Q.;Elie, N.	2001	A study of artemether combined with primaquine in the treatment of falciparum malaria	Chinese journal of parasitology & parasitic diseases	19	5	308-9	OBJECTIVE: To evaluate the efficacy and side effects of artemether combined with primaquine in the treatment of falciparum malaria. METHODS: Randomization and comparison methods were used in 121 falciparum malaria cases in the Republic of Central Africa. Sixty-one cases were treated with artemether combined with primaquine (Group A used artemether orally, Group B used artemether intramuscularly).…	12572052	Africa	Central Republic of Africa
Molta, N. B.;Watila, I. M.;Akpede, G. O.;Ekanem, O. J.	2001	Preliminary assessment of the efficacy of mefloquine/-sulphadoxine/ pyrimethamine combination in the treatment of uncomplicated malaria in children in North Eastern Nigeria	African journal of medicine and medical sciences	30 Suppl		47-51	Preliminary assessment of efficacy of mefloquine/-sulphadoxine/pyrimethamine (MSP) combination in the treatment of uncomplicated Plasmodium infections was conducted in-vivo in non-immune and semi-immune children in Damboa, in the North east of Nigeria using a 7-day protocol. Six hundred and forty-six (76.4%) subjects out of 846 screened had positive Plasmodium infections. Seventy-two patients age…	14513939	Africa	Nigeria
Adjuik, M.;Agnamey, P.;Babiker, A.;Borrmann, S.;Brasseur, P.;Cisse, M.;Cobelens, F.;Diallo, S.;Faucher, J. F.;Garner, P.;Gikunda, S.;Kremsner, P. G.;Krishna, S.;Lell, B.;Loolpapit, M.;Matsiegui, P. B.;Missinou, M. A.;Mwanza, J.;Ntoumi, F.;Olliaro, P.;Osimbo, P.;Rezbach, P.;Some, E.;Taylor, W. R.	2002	Amodiaquine-artesunate versus amodiaquine for uncomplicated Plasmodium falciparum malaria in African children: a randomised, multicentre trial	Lancet	359	9315	1365-72	BACKGROUND: Increasing drug resistance limits the choice of efficacious chemotherapy against Plasmodium falciparum malaria in Africa. Amodiaquine still retains efficacy against P falciparum in many African countries. We assessed the safety, treatment efficacy, and effect on gametocyte carriage of adding artesunate to amodiaquine in three randomised trials in Kenya, Senegal, and Gabon. METHODS: We…	11978332	Africa	Multicentred
Yavo, W.;Menan, E. I.;Adjetey, T. A.;Barro-Kiki, P. C.;Nigue, L.;Konan, Y. J.;Nebavi, N. G.;Kone, M.	2002	In vivo sensitivity of Plasmodium falciparum to amino-4-quinolines and sulfadoxine pyrimethamine in Agou (Ivory Coast)	Pathologie-biologie	50	3	184-8	A comparative study of the in vivo sensitivity of Plasmodium falciparum to amodiaquine versus chloroquine has been made among children in Agou (south Cote d'Ivoire). In case of resistance to these drugs, the association of sulfadoxine-pyrimethamine was administered and followed by a J14 checking. We have noticed: (1) 8.47% of amodiaquine resistance versus 36.96% of chloroquine resistance (all the…	11980332	Africa	Cote d'Ivoire
Henry, M. C.;Niangue, J.;Kone, M.	2002	Which medication should be used to treat uncomplicated malaria when chloroquine becomes ineffective in Western Cote d'Ivoire?	Medecine tropicale : revue du Corps de sante colonial	62	1	55-7	Study of children treated for uncomplicated malaria in the sub-prefecture of Zouan Hounien in Western Cote d'Ivoire demonstrated that clinical failure rates (WHO 14-day test) were 43% for chloroquine and 6% for pyrimethamine-sulfadoxine (PS). Two issues raise serious doubts about the use of PS as a replacement for chloroquine. The first is detection of persistent asymptomatic parasitemia at day 7…	12038180	Africa	Cote d'Ivoire
Blair-Trujillo, S.;Lacharme-Lora, L.;Carmona-Fonseca, J.	2002	Resistance of Plamodium falciparum to antimalarial drugs in Zaragoza (Antioquia, Colombia), 1998	Memorias do Instituto Oswaldo Cruz	97	3	401-6	Plasmodium falciparum sensitivity to chloroquine (CHL), amodiaquine (AMO) and sulfadoxine/pyrimethamine (SDX/PYR) was assessed in vivo and in vitro in a representative sample from the population of Zaragoza in El Bajo Cauca region (Antioquia-Colombia). There were 94 patients with P. falciparum evaluated. For the in vivo test the patients were followed by clinical examination and microscopy, durin…	12048572	S.America	Colombia
McGready, R.;Thwai, K. L.;Cho, T.;Samuel;Looareesuwan, S.;White, N. J.;Nosten, F.	2002	The effects of quinine and chloroquine antimalarial treatments in the first trimester of pregnancy	Transactions of the Royal Society of Tropical Medicine and Hygiene	96	2	180-4	Quinine (n = 246) was used to treat uncomplicated Plasmodium falciparum and chloroquine (n = 130) was used to treat P. vivax, in a total of 376 episodes of malaria in the first trimester of pregnancy, in 300 Karen women (Thailand, 1995-2000). Parasites were still present on day 6 or 7 in 4.7% (11/234) of episodes treated with quinine. The overall 28 day parasite reappearance rate following quinin…	12055810	Asia	Thailand
Legros, D.;Johnson, K.;Houpikian, P.;Makanga, M.;Kabakyenga, J. K.;Talisuna, A. O.;Taylor, W. R.	2002	Clinical efficacy of chloroquine or sulfadoxine-pyrimethamine in children under five from south-western Uganda with uncomplicated falciparum malaria	Transactions of the Royal Society of Tropical Medicine and Hygiene	96	2	199-201	We conducted a 14-day study (during March-May 1998) to assess the efficacy of chloroquine and sulfadoxine-pyrimethamine (SP) for treating uncomplicated Plasmodium falciparum malaria in Uganda. Overall treatment failure rates were 43 (81.1%) of 53 chloroquine recipients and 16 (25.0%) of 64 SP patients. Strategies to improve the life-span of standard and affordable anti-malarial drugs are needed.	12055815	Africa	Uganda
Sowunmi, A.	2002	A randomized comparison of chloroquine, amodiaquine and their combination with pyrimethamine-sulfadoxine in the treatment of acute, uncomplicated, Plasmodium falciparum malaria in children	Annals of tropical medicine and parasitology	96	3	227-38	The increasing resistance of Plasmodium falciparum to antimalarial monotherapy (MT) has created an urgent need for the evaluation of alternative effective, safe, cheap, readily available and affordable, combination treatments (CT) with antimalarial drugs. In the present study, the efficacies of chloroquine (CQ) or amodiaquine (AQ) in the oral treatment of acute, symptomatic, uncomplicated, Plasmo…	12061970	Africa	Nigeria
Ehrhardt, S.;Mockenhaupt, F. P.;Agana-Nsiire, P.;Mathieu, A.;Anemana, S. D.;Stark, K.;Otchwemah, R. N.;Bienzle, U.	2002	Efficacy of chloroquine in the treatment of uncomplicated, Plasmodium falciparum malaria in northern Ghana	Annals of tropical medicine and parasitology	96	3	239-47	Chloroquine (CQ) resistance in Plasmodium falciparum contributes to growing malaria-attributable morbidity and mortality in sub-Saharan Africa. However, the extent and degree of such resistance vary considerably between endemic areas. Data on CQ resistance in northern Ghana are almost entirely lacking. The therapeutic efficacy of CQ in uncomplicated malaria was therefore assessed, in a standard, …	12061971	Africa	Ghana
Congpuong, K.;Na-Bangchang, K.;Thimasarn, K.;Tasanor, U.;Wernsdorfer, W. H.	2002	Sensitivity of Plasmodium vivax to chloroquine in Sa Kaeo Province, Thailand	Acta tropica	83	2	117-21	Following a recent, abrupt local increase in the incidence of vivax malaria, a study was conducted in order to evaluate the efficacy of chloroquine for the treatment of 26 adult patients with acute vivax malaria in Sa Kaeo Province, Thailand. The chloroquine sensitivity of Plasmodium vivax has been assessed in parallel, using a growth inhibition method. Blood samples for the in vitro tests were t…	12088852	Asia	Thailand
Driessen, G. J.;van, K. S.;Schouwenberg, B. J.;Bonsu, G.;Verhave, J. P.	2002	Sulphadoxine/pyrimethamine: an appropriate first-line alternative for the treatment of uncomplicated falciparum malaria in Ghanaian children under 5 years of age	Tropical medicine & international health	7	7	577-83	OBJECTIVE: To assess whether chloroquine (CQ) still is an appropriate first-line drug for the treatment of uncomplicated falciparum malaria in Ghana and whether sulphadoxine/pyrimethamine (SP) could be a good alternative. METHOD: The parasitological, clinical and haematological responses to CQ and SP were studied in children < 5 years of age according to a modified WHO 28-day in vivo protocol. A …	12100440	Africa	Ghana
Tarimo, D. S.;Minjas, J. N.;Bygbjerg, I. C.	2002	Sulfadoxine-pyrimethamine monotherapy in Tanzanian children gives rapid parasite clearance but slow fever clearance that is improved by chloroquine in combination therapy	Tropical medicine & international health	7	7	592-8	Following widespread chloroquine (CQ) resistance, sulfadoxine plus pyrimethamine (SP) is now the first line antimalarial drug in a number of African countries including Tanzania. Unlike CQ, SP has no antipyretic effects, a feature that might delay fever clearance, and by acting on late stage parasites, SP could theoretical be slow in parasite clearance. We therefore assessed the antipyretic effec…	12100442	Africa	Tanzania
Castillo, C. M.;Osorio, L. E.;Palma, G. I.	2002	Assessment of therapeutic response of Plasmodium vivax and Plasmodium falciparum to chloroquine in a Malaria transmission free area in Colombia	Memorias do Instituto Oswaldo Cruz	97	4	559-62	In order to determine the frequency of therapeutic failures to chloroquine (CQ) in patients with malaria due to either Plasmodium falciparum or P. vivax, and to explore the usefulness of a malaria-free city as a sentinel site to monitor the emergence of drug resistance, 53 patients (44 infected with P. vivax and 9 with P. falciparum) were evaluated at the Laboratory of Parasitology, Universidad d…	12118291	S.America	Colombia
Basco, L. K.;Same-Ekobo, A.;Ngane, V. F.;Ndounga, M.;Metoh, T.;Ringwald, P.;Soula, G.	2002	Therapeutic efficacy of sulfadoxine-pyrimethamine, amodiaquine and the sulfadoxine-pyrimethamine-amodiaquine combination against uncomplicated Plasmodium falciparum malaria in young children in Cameroon	Bulletin of the World Health Organization	80	7	538-45	OBJECTIVE: To evaluate the therapeutic efficacy of sulfadoxine-pyrimethamine, amodiaquine, and the sulfadoxine-pyrimethamine-amodiaquine combination for the treatment of uncomplicated Plasmodium falciparum malaria in young children in Cameroon. METHODS: In a randomized study we evaluated the effectiveness and tolerance of (i) sulfadoxine-pyrimethamine (SP) (25 mg/kg body weight of sulfadoxine and…	12163917	Africa	Cameroon
Baird, J. K.;Tiwari, T.;Martin, G. J.;Tamminga, C. L.;Prout, T. M.;Tjaden, J.;Bravet, P. P.;Rawlins, S.;Ferrel, M.;Carucci, D.;Hoffman, S. L.	2002	Chloroquine for the treatment of uncomplicated malaria in Guyana	Annals of tropical medicine and parasitology	96	4	339-48	At a public hospital in Georgetown, Guyana, 44 patients seeking treatment for symptomatic, slide-confirmed malaria were given standard chloroquine (CQ) therapy and followed for 28 days. The patients apparently had pure infections with Plasmodium falciparum (14), P. vivax (13) or P. malariae (one), or mixed infections either of P. falciparum and P. vivax (17) or of P. falciparum, P. malariae and P…	12171615	S.America	Guyana
Kofoed, P. E.;Co, F.;Johansson, P.;Dias, F.;Cabral, C.;Hedegaard, K.;Aaby, P.;Rombo, L.	2002	Treatment of uncomplicated malaria in children in Guinea-Bissau with chloroquine, quinine, and sulfadoxine-pyrimethamine	Transactions of the Royal Society of Tropical Medicine and Hygiene	96	3	304-9	With the increasing resistance to commonly used antimalarial drugs, different untested 'local' treatment regimens for malaria will arise. We compared commonly used treatment regimens for children in Guinea-Bissau. Symptomatic children with Plasmodium falciparum mono-infection were allocated at random to one of 4 treatments: 15 mg/kg quinine twice a day for 3 d (group 1); 10 mg/kg quinine twice a …	12174785	Africa	Guinea-Bissau
Fryauff, D. J.;Leksana, B.;Masbar, S.;Wiady, I.;Sismadi, P.;Susanti, A. I.;Nagesha, H. S.;Syafruddin;Atmosoedjono, S.;Bangs, M. J.;Baird, J. K.	2002	The drug sensitivity and transmission dynamics of human malaria on Nias Island, North Sumatra, Indonesia	Annals of tropical medicine and parasitology	96	5	447-62	Nias Island, off the north-western coast of Sumatra, Indonesia, was one of the first locations in which chloroquine-resistant Plasmodium vivax malaria was reported. This resistance is of particular concern because its ancient megalithic culture and the outstanding surfing conditions make the island a popular tourist destination. International travel to and from the island could rapidly spread chl…	12194705	Asia	Indonesia
Popov, A. F.;Morokov, V. S.;Chirkov, V. P.;Popova, N. I.;Lama, N.	2002	Efficacy of mefloquine, halofantrine, and coarteme in the treatment of tropical malaria	Meditsinskaia parazitologiia i parazitarnye bolezni		1	28-29		12224261	NA	NA
Baird, J. K.;Wiady, I.;Sutanihardja, A.;Suradi;Purnomo;Basri, H.;Sekartuti;Ayomi, E.;Fryauff, D. J.;Hoffman, S. L.	2002	Short report: therapeutic efficacy of chloroquine combined with primaquine against Plasmodium falciparum in northeastern Papua, Indonesia	The American journal of tropical medicine and hygiene	66	6	659-60	Chloroquine combined with primaquine was evaluated for therapy of uncomplicated malaria caused by Plasmodium falciparum in nonimmune Javanese migrants to northeastern Papua, Indonesia. Subjects were randomized to treatment with standard chloroquine therapy (25 mg/kg in 3 doses over the course of 48 hours) with 30 mg primaquine administered daily for 28 days (n = 25) or a placebo of primaquine (n …	12224570	Asia	Indonesia
Ling, J.;Baird, J. K.;Fryauff, D. J.;Sismadi, P.;Bangs, M. J.;Lacy, M.;Barcus, M. J.;Gramzinski, R.;Maguire, J. D.;Kumusumangsih, M.;Miller, G. B.;Jones, T. R.;Chulay, J. D.;Hoffman, S. L.	2002	Randomized, placebo-controlled trial of atovaquone/proguanil for the prevention of Plasmodium falciparum or Plasmodium vivax malaria among migrants to Papua, Indonesia	Clinical infectious diseases	35	7	825-33	The increasing prevalence of resistance to antimalarial drugs reduces options for malaria prophylaxis. Atovaquone/proguanil (Malarone; GlaxoSmithKline) has been >95% effective in preventing Plasmodium falciparum malaria in lifelong residents of areas of holoendemicity, but data from persons without clinical immunity or who are at risk for Plasmodium vivax malaria have not been described. We condu…	12228819	Asia	Indonesia
Phan, G. T.;de, V. P. J.;Tran, B. Q.;Le, H. Q.;Nguyen, N. V.;Nguyen, T. V.;Heisterkamp, S. H.;Kager, P. A.	2002	Artemisinin or chloroquine for blood stage Plasmodium vivax malaria in Vietnam	Tropical medicine & international health	7	10	858-64	Chloroquine-resistant Plasmodium vivax has not yet occurred in Vietnam. The efficacy of artemisinin for P. vivax was not established. We conducted a double-blind randomized study involving 240 inpatients with P. vivax malaria who received artemisinin (40 mg/kg over 3 days) plus placebo chloroquine (Art) or chloroquine (25 mg/kg over 3 days) plus placebo artemisinin (Chl). Patients were followed u…	12358621	Asia	Vietnam
Schellenberg, D.;Kahigwa, E.;Drakeley, C.;Malende, A.;Wigayi, J.;Msokame, C.;Aponte, J. J.;Tanner, M.;Mshinda, H.;Menendez, C.;Alonso, P. L.	2002	The safety and efficacy of sulfadoxine-pyrimethamine, amodiaquine, and their combination in the treatment of uncomplicated Plasmodium falciparum malaria	The American journal of tropical medicine and hygiene	67	1	17-23	The safety and efficacy of amodiaquine (AQ), sulfadoxine-pyrimethamine (SP), and coadministered AQ+SP was assessed in 351 Tanzanian children (age range, 6-59 months) with uncomplicated Plasmodium falciparum malaria. This open, randomized study followed the 28-day World Health Organization (WHO) protocol and evaluated safety using clinical and laboratory parameters. Children receiving SP were more…	12363058	Africa	Tanzania
Kofoed, P. E.;Lopez, F.;Johansson, P.;Sandstrom, A.;Hedegaard, K.;Aaby, P.;Rombo, L.	2002	Treatment of children with Plasmodium falciparum malaria with chloroquine in Guinea-Bissau	The American journal of tropical medicine and hygiene	67	1	28-31	Children with symptomatic malaria in Bissau, Guinea-Bissau were randomly assigned to treatment with a 25 mg/kg total dose of chloroquine as recommended by the National Malaria Program or with a higher total dose of 50 mg/kg. Sixty-seven and 62 children, respectively, completed the treatment and were then followed once a week for five weeks. Treatment with a dose of 50 mg/kg was significantly more…	12363060	Africa	Guinea-Bissau
Warsame, M.;Abdillahi, A.;Duale, O. N.;Ismail, A. N.;Hassan, A. M.;Mohamed, A.;Warsame, A.	2002	Therapeutic efficacy of chloroquine and sulfadoxine/pyrimethamine against Plasmodium falciparum infection in Somalia	Bulletin of the World Health Organization	80	9	704-8	OBJECTIVE: To assess the efficacy of chloroquine and sulfadoxine/pyrimethamine in the treatment of uncomplicated Plasmodium falciparum infections in Somalia. METHODS: Patients with clinical malaria in Merca, an area of high transmission of the disease, were treated with the standard regimens of chloroquine (25 mg/kg) or sulfadoxine/pyrimethamine (25 mg sulfadoxine and 1.25 mg pyrimethamine per kg…	12378287	Africa	Somalia
Lacy, M. D.;Maguire, J. D.;Barcus, M. J.;Ling, J.;Bangs, M. J.;Gramzinski, R.;Basri, H.;Sismadi, P.;Miller, G. B.;Chulay, J. D.;Fryauff, D. J.;Hoffman, S. L.;Baird, J. K.	2002	Atovaquone/proguanil therapy for Plasmodium falciparum and Plasmodium vivax malaria in Indonesians who lack clinical immunity	Clinical infectious diseases	35	9	e92-5	Thirty-eight of 295 subjects participating in a randomized, double-blind, placebo-controlled trial of the efficacy of daily administration of atovaquone/proguanil for malaria prevention developed malaria at some time during the 20-week prophylaxis period. These subjects (3 atovaquone/proguanil recipients and 35 placebo recipients) were treated with 4 tablets of atovaquone/proguanil per day for 3 …	12384852	Asia	Indonesia
Guthmann, J. P.;Kasparian, S.;Phetsouvanh, R.;Nathan, N.;Garcia, M.;Phompida, S.;Brockman, A.;Gastellu, M.;Legros, D.	2002	The efficacy of chloroquine for the treatment of acute, uncomplicated, Plasmodium falciparum malaria in Laos	Annals of tropical medicine and parasitology	96	6	553-7	To assess the local efficacy of chloroquine for the treatment of acute, uncomplicated, Plasmodium falciparum malaria, children and adults from Sekong province (an area of Laos with a low intensity of transmission) were tested in a 28-day, in-vivo study. Complete data were collected from 88 of the 102 subjects enrolled between October 1999 and September 2000. After genotypic analysis to distinguis…	12396318	Asia	Laos
Yadav, R. S.;Ghosh, S. K.	2002	Radical curative efficacy of five-day regimen of primaquine for treatment of Plasmodium vivax malaria in India	The Journal of parasitology	88	5	1042-4	For over 4 decades the antimalarial program in India has been prescribing a 5-day primaquine regimen as an antirelapse therapy to treat Plasmodium vivax malaria. In view of conflicting reports on the effectiveness of this regimen in the Indian subcontinent, and the varying prevalence of P. vivax in various ecosystems in India, the antirelapse efficacy of this regimen was evaluated in Orissa, a ma…	12435158	Asia	India
Tjitra, E.;Baker, J.;Suprianto, S.;Cheng, Q.;Anstey, N. M.	2002	Therapeutic efficacies of artesunate-sulfadoxine-pyrimethamine and chloroquine-sulfadoxine-pyrimethamine in vivax malaria pilot studies: relationship to Plasmodium vivax dhfr mutations	Antimicrobial agents and chemotherapy	46	12	3947-53	Artemisinin-derivative combination therapies (ACT) are highly efficacious against multidrug-resistant Plasmodium falciparum malaria. Few efficacy data, however, are available for vivax malaria. With high rates of chloroquine (CQ) resistance in both vivax and falciparum malaria in Papua Province, Indonesia, new combination therapies are required for both species. We recently found artesunate plus …	12435700	Asia	Indonesia
Weerasinghe, K. L.;Galappaththy, G.;Fernando, W. P.;Wickremasinghe, D. R.;Faizal, H. M.;Wickremasinghe, A. R.	2002	A safety and efficacy trial of artesunate, sulphadoxine-pyrimethamine and primaquine in P falciparum malaria	The Ceylon medical journal	47	3	83-5	OBJECTIVE: To determine effectiveness and safety of the combination of artesunate, sulphadoxine + pyrimethamine and primaquine in the treatment of P falciparum malaria. DESIGN: A hospital based prospective study. SETTING: Base Hospital, Moneragala. METHODS: In 30 P falciparum infected patients admitted to the hospital, blood was taken for estimation of haemoglobin, white cell counts, and serum le…	12449772	Asia	Sri Lanka
Denis, M. B.;Davis, T. M.;Hewitt, S.;Incardona, S.;Nimol, K.;Fandeur, T.;Poravuth, Y.;Lim, C.;Socheat, D.	2002	Efficacy and safety of dihydroartemisinin-piperaquine (Artekin) in Cambodian children and adults with uncomplicated falciparum malaria	Clinical infectious diseases	35	12	1469-76	The safety and efficacy of a novel combination of dihydroartemisinin (DHA) and piperaquine, Artekin (Holleykin Pharmaceuticals), were assessed in 106 patients (76 children and 30 adults) with uncomplicated falciparum malaria from 2 remote areas in Cambodia. Age-based doses were given at 0, 8, 24, and 32 h. Mean total DHA and piperaquine doses were 9.1 and 73.9 mg/kg, respectively, for children an…	12471565	Asia	Cambodia
van Vugt, M; Leonardi, E; Phaipun, L; Slight, T; Thway KL; McGready R; Brockman A; Villegas L; Looareesuwan S; White NJ; Nosten F.	2002	Treatment of uncomplicated multidrug-resistant falciparum malaria with artesunate-atovaquone-proguanil	Clinical infectious diseases	35	12	1498-504	In an open-label trial carried out on the northwest border of Thailand, 1596 patients with uncomplicated multidrug-resistant falciparum malaria were randomly assigned to receive atovaquone-proguanil, atovaquone-proguanil-artesunate, or artesunate-mefloquine and were followed up for 42 days. All 3 regimens were highly effective and well tolerated. Fever duration and parasite clearance times were s…	12471569	Asia	Thailand
Krudsood, S.;Looareesuwan, S.;Silachamroon, U.;Chalermrut, K.;Pittrow, D.;Cambon, N.;Mueller, E. A.	2002	Artesunate and mefloquine given simultaneously for three days via a prepacked blister is equally effective and tolerated as a standard sequential treatment of uncomplicated acute Plasmodium falciparum malaria: randomized, double-blind study in Thailand	The American journal of tropical medicine and hygiene	67	5	465-72	The combination of artesunate and mefloquine is currently one of the most effective treatments against multidrug-resistant Plasmodium falciparum malaria. To improve patient compliance to such a combination, the two agents have been combined in a prepacked single blister. Patients were instructed to simultaneously co-administer the drugs once a day for three days. In the present randomized, double…	12479545	Asia	Thailand
Dorsey, G.;Njama, D.;Kamya, M. R.;Cattamanchi, A.;Kyabayinze, D.;Staedke, S. G.;Gasasira, A.;Rosenthal, P. J.	2002	Sulfadoxine/pyrimethamine alone or with amodiaquine or artesunate for treatment of uncomplicated malaria: a longitudinal randomised trial	Lancet	360	9350	2031-8	BACKGROUND: New antimalarial treatments are urgently needed in sub-Saharan Africa. Improved therapies should decrease failure rates in the short term, but their effect on incidence of subsequent episodes of malaria is little studied. We aimed to compare the short-term and long-term effectiveness of three antimalarial regimens in children from Kampala, Uganda. METHODS: We randomly allocated health…	12504399	Africa	Uganda
Maguire, J. D.;Lacy, M. D.;Sururi;Sismadi, P.;Krisin;Wiady, I.;Laksana, B.;Bangs, M. J.;Masbar, S.;Susanti, I.;Basuki, W.;Barcus, M. J.;Marwoto, H.;Edstein, M. D.;Tjokrosonto, S.;Baird, J. K.	2002	Chloroquine or sulfadoxine-pyrimethamine for the treatment of uncomplicated, Plasmodium falciparum malaria during an epidemic in Central Java, Indonesia	Annals of tropical medicine and parasitology	96	7	655-68	A recent malaria epidemic in the Menoreh Hills of Central Java has increased concern about the re-emergence of endemic malaria on Java, which threatens the island's 120 million residents. A 28-day, in-vivo test of the efficacy of treatment of malaria with antimalarial drugs was conducted among 167 villagers in the Menoreh Hills. The treatments investigated, chloroquine (CQ) and sulfadoxine-pyrime…	12537627	Asia	Indonesia
Zhang, Z. X.;Li, C. Z.;Huang, G. Z.;Yang, Y. M.;Zhou, S.;Sun, X. D.;Li, L.	2002	Assessment of therapeutic efficacy of chloroquine against falciparum malaria in an outbreak area in Xishuangbanna, Yunnan	Chinese journal of parasitology & parasitic diseases	20	2	94-7	OBJECTIVE: To investigate the failure of treatment with chloroquine in Yunnan in order to help formulate adequate antimalarial drug policy. METHODS: A World Health Organization 28-day in vivo test on therapeutic response for uncomplicated falciparum malaria in area with low or moderate transmission was adopted. Patients of age > or = 6 months old were admitted without limitation in density of par…	12567568	Asia	China
Wang, S. Q.;Meng, F.;Shen, H.;Wen, Y.;Zhuo, K. R.;Zhu, Q. X.;Pang, X. J.;Lin, S. G.;Zeng, L. H.	2002	Therapeutic effect of dihydroartemisinin combined with naphthoquine phosphate in patients with falciparum malaria	Chinese journal of parasitology & parasitic diseases	20	3	180-2	OBJECTIVE: To observe the therapeutic efficacy of dihydroartemisinin combined with naphthoquine phosphate in patients with falciparum malaria. METHODS: Patients with Plasmodium falciparum were selected as the subjects, treated with a single dose of dihydroarteminisinin 160 mg combined with naphthoquine phosphate 400 mg (for adults) and followed up in preselective time by blood and temperature exa…	12568004	Asia	China
Liu, D. Q.;Lin, S. G.;Feng, X. P.;Chen, W. J.;Chen, P. L.;Wu, H. M.;Chen, C.;Liu, J.	2002	Study on treatment of multi-drug resistant falciparum malaria by using a combination of dihydroartemisinin and pyronaridine	Chinese journal of parasitology & parasitic diseases	20	4	193-6	OBJECTIVE: To provide a combined medication scheme for the treatment of multi-drug resistant falciparum malaria. METHODS: Combined administration of dihydroartemisinin and pyronaridine was given to the 32 cases of falciparum malaria cases with multi-drug resistance. The indices for evaluation on day 14, 21, and 28 after treatment included the mean fever subsidence time, mean asexual form clearanc…	12568014	Asia	China
Adou-Bryn, K. D.;Krelo, K.;Akoussi, C. F.;Boni, N. M.;Yapo, G. C.;Penali, L. K.;Ouhon, J.;Assoumou, A.;Ehouman, A.	2002	Therapeutic efficacy of chloroquine in the uncomplicated malaria due to Plasmodium falciparum in hospital patients in central Ivory Coast (1997-2000)	Bulletin de la Societe de pathologie exotique	95	4	262-4	A study in vivo of Plasmodium falciparum sensitivity to chloroquine was carried out from April 1997 to February 2000 at Yamoussoukro, Kossou and Bouake in the central region of Cote d'Ivoire. This study was included in the national Plasmodium falciparum-sensitivity program. One hundred and sixteen subjects consulting for suspected malaria were included according to the WHO's standard of 14 days. …	12596374	Africa	Cote d'Ivoire
Massougbodji, A.;Kone, M.;Kinde-Gazard, D.;Same-Ekobo, A.;Cambon, N.;Mueller, E. A.	2002	A randomized, double-blind study on the efficacy and safety of a practical three-day regimen with artesunate and mefloquine for the treatment of uncomplicated Plasmodium falciparum malaria in Africa	Transactions of the Royal Society of Tropical Medicine and Hygiene	96	6	655-9	A randomized, double-blind, parallel-group study in 104 hospitalized patients with acute, uncomplicated Plasmodium falciparum malaria was performed in West and Central Africa from March to July 2001. Patients were randomized to receive simultaneous dosing (artesunate 200 mg/d plus mefloquine 250 mg/d from the first to the third day [investigational group]) or sequential dosing (artesunate 200 mg/…	12625145	Africa	Multicentred
Checchi, F.;Durand, R.;Balkan, S.;Vonhm, B. T.;Kollie, J. Z.;Biberson, P.;Baron, E.;Le, B. J.;Guthmann, J. P.	2002	High Plasmodium falciparum resistance to chloroquine and sulfadoxine-pyrimethamine in Harper, Liberia: results in vivo and analysis of point mutations	Transactions of the Royal Society of Tropical Medicine and Hygiene	96	6	664-9	In Liberia, little information is available on the efficacy of antimalarials against Plasmodium falciparum malaria. We measured parasitological resistance to chloroquine and sulfadoxine-pyrimethamine (SP) in Harper, south-west Liberia in a 28-d study in vivo. A total of 50 patients completed follow-up in the chloroquine group, and 66 in the SP group. The chloroquine failure rate was 74.0% (95% co…	12625147	Africa	Liberia
Checchi, F.;Balkan, S.;Vonhm, B. T.;Massaquoi, M.;Biberson, P.;Eldin, d. P. P.;Brasseur, P.;Guthmann, J. P.	2002	Efficacy of amodiaquine for uncomplicated Plasmodium falciparum malaria in Harper, Liberia	Transactions of the Royal Society of Tropical Medicine and Hygiene	96	6	670-3	In the face of spreading chloroquine and sulfadoxine-pyrimethamine (SP) resistance, amodiaquine remains a cheap and efficacious alternative for treating uncomplicated Plasmodium falciparum malaria in many settings. In Harper, south-eastern Liberia, a previous study we conducted showed very high levels of resistance to both chloroquine and SP. In 2001, in an effort to look for possible alternative…	12625148	Africa	Liberia
Djaman, A. J.;Basco, L. K.;Mazabraud, A.	2002	Monitoring the chemoresistance of Plasmodium falciparum malaria in Yopougon (Abidjan): in vivo study of chloroquine sensitivity and evaluation of pyrimethamine resistance following the analysis of point mutation in the dihydrofolate reductase gene	Sante (Montrouge France)	12	4	363-7	A major endemic in Cote d'Ivoire, malaria is the first cause of hospital admissions and mortality in tropical Africa. The decrease of morbidity and mortality depends on early diagnosis and relevant treatment. This situation is hampered by an emerging resistance of P. falciparum to usual drugs such as chloroquine and sulfadoxine-pyrimethamine. In recognition of this problem, we established a monit…	12626289	Africa	Cote d'Ivoire
Hamedi, Y.;Nateghpour, M.;Tan-ariya, P.;Tiensuwan, M.;Silachamroon, U.;Looareesuwan, S.	2002	Plasmodium vivax malaria in Southeast Iran in 1999-2001: establishing the response to chloroquine in vitro and in vivo	The Southeast Asian journal of tropical medicine and public health	33	3	512-8	Chloroquine-resistant Plasmodium vivax is emerging in Oceania, Asia and Latin America. The drug sensitivity of P. vivax to chloroquine both in vivo and in vitro in the southern part of Iran was assessed; chloroquine-resistant Plasmodium falciparum has already been documented in this area. The in vitro sensitivity of 39 P. vivax isolates was assessed: the mean IC50 and IC90 were 189 ng/ml and 698 …	12693585	Asia	Iran
Wilairatana, P.;Krudsood, S.;Chalermrut, K.;Pengruksa, C.;Srivilairit, S.;Silachamroon, U.;Treeprasertsuk, S.;Looareesuwan, S.	2002	An open randomized clinical trial of Artecom vs artesunate-mefloquine in the treatment of acute uncomplicated falciparum malaria in Thailand	The Southeast Asian journal of tropical medicine and public health	33	3	519-24	The efficacy and safety of Artecom were assessed in an open randomized trial in adults presenting with acute, uncomplicated Plasmodium falciparum malaria in Thailand. Three hundred and fifty-two patients were randomly enroled at the ratio of 2:1 into group A:B and received Artecom (group A) and the standard combination of artesunate and mefloquine (group B) respectively. All patients had rapid in…	12693586	Asia	Thailand
Krudsood, S.;Buchachart, K.;Chalermrut, K.;Charusabha, C.;Treeprasertsuk, S.;Haoharn, O.;Duangdee, C.;Looareesuwan, S.	2002	A comparative clinical trial of combinations of dihydroartemisinin plus azithromycin and dihydroartemisinin plus mefloquine for treatment of multidrug resistant falciparum malaria	The Southeast Asian journal of tropical medicine and public health	33	3	525-31	With the deteriorating situation of multidrug resistant falciparum malaria, a new drug or drugs in combinations are urgently needed. We conducted a study comparing a combination of dihydroartemisinin 240 mg and mefloquine 1,250 mg given over 3 days (Group 1) and a combination of dihydroartemisinin 240 mg and azithromycin 1,500 mg given over 3 days (Group 2), to determine safety, efficacy and tole…	12693587	Asia	Thailand
Fontes, C. J.;Ribeiro, L. C.;Pang, L. W.	2002	Proguanil plus sulfamethoxazole in the treatment of uncomplicated Plasmodium falciparum malaria	The Southeast Asian journal of tropical medicine and public health	33	4	685-8	In a malaria endemic area of Brazil where P. falciparum is highly resistant to chloroquine and Fansidar, we conducted an in vivo study to evaluate the therapeutic response of proguanil plus sulfametoxazole against Plasmodium falciparum malaria. Twenty-five adult subjects with uncomplicated P. falciparum malaria received supervised drug administration and were followed for 28 days in an inpatient …	12757209	S.America	Brazil
Fehintola, F. A.;Adedeji, A. A.;Sowunmi, A.	2002	Comparative efficacy of chloroquine and cotrimoxazole in the treatment of acute uncomplicated falciparum malaria in Nigerian children	The Central African journal of medicine	48	2011-10-09	101-5	OBJECTIVES: To evaluate the efficacy of two dosing regimens of cotrimoxazole in the treatment of falciparum malaria and compare the efficacy with that of chloroquine, the first-line antimalaria drug in the area of study. DESIGN: A prospective cross sectional study. SETTINGS: Department of Clinical Pharmacology, University College Hospital, Ibadan, Nigeria. SUBJECTS: Ninety eight children with acu…	14562530	Africa	Nigeria
Schwobel, B.;Jordan, S.;Vanisaveth, V.;Phetsouvanh, R.;Christophel, E. M.;Phompida, S.;von, S. F.;Jelinek, T.	2003	Therapeutic efficacy of chloroquine plus sulphadoxine/ pyrimethamine compared with monotherapy with either chloroquine or sulphadoxine/pyrimethamine in uncomplicated Plasmodium falciparum malaria in Laos	Tropical medicine & international health	8	1	19-24	In a southern border province of Lao PDR, we compared the efficacy of antimalarial drug combinations in patients aged >or=1 year with uncomplicated Plasmodium falciparum malaria: monotherapy with either mefloquine (MQ), chloroquine (CQ), or sulphadoxine/pyrimethamine (SP) vs. the combination of both CQ and SP. Follow-up time was 14 days. Of 265 P. falciparum positive patients, 119 were enrolled i…	12535245	Asia	Laos
Marquino, W.;MacArthur, J. R.;Barat, L. M.;Oblitas, F. E.;Arrunategui, M.;Garavito, G.;Chafloque, M. L.;Pardave, B.;Gutierrez, S.;Arrospide, N.;Carrillo, C.;Cabezas, C.;Ruebush, T. K., 2nd	2003	Efficacy of chloroquine, sulfadoxine-pyrimethamine, and mefloquine for the treatment of uncomplicated Plasmodium falciparum malaria on the north coast of Peru	The American journal of tropical medicine and hygiene	68	1	120-3	As part of an effort to assess antimalarial drug resistance in Peru, we carried out 14-day in vivo efficacy trials of chloroquine (CQ; 25 mg/kg) and sulfadoxine-pyrimethamine (SP; 25 mg/kg of the sulfadoxine component) for the treatment of uncomplicated Plasmodium falciparum infections at three sites on the northern coast of Peru. Mefloquine (MQ; 15 mg/kg) also was evaluated at one site. The resu…	12557836	S.America	Peru
Muller, O.;Traore, C.;Kouyate, B.	2003	Clinical efficacy of chloroquine in young children with uncomplicated falciparum malaria--a community-based study in rural Burkina Faso	Tropical medicine & international health	8	3	202-3	We report on a 14-day study on the efficacy of chloroquine for treating uncomplicated falciparum malaria in young children of a malaria holoendemic area in rural Burkina Faso. In this community-based study, the overall treatment failure rate was 12/120 (10%), with no differences between villages. This supports the evidence for a still sufficient efficacy of chloroquine in north-western Burkina Fa…	12631308	Africa	Burkina Faso
Wong, J. W.;Yuen, K. H.;Nagappan, S.;Shahul, W. S.;Ho, S. S.;Gan, E. K.;Toh, W. T.	2003	Therapeutic equivalence of a low dose artemisinin formulation in falciparum malaria patients	The Journal of pharmacy and pharmacology	55	2	193-8	We have evaluated the therapeutic equivalence of a beta-cyclodextrin-artemisinin complex at an artemisinin dose of 150 mg, with a commercial reference preparation, Artemisinin 250 at a recommended dose of 250 mg. One hundred uncomplicated falciparum malarial patients were randomly assigned to orally receive either beta-cyclodextrin-artemisinin complex (containing 150 mg artemisinin) twice daily f…	12631411	Asia	Malaysia
Karunajeewa, H. A.;Kemiki, A.;Alpers, M. P.;Lorry, K.;Batty, K. T.;Ilett, K. F.;Davis, T. M.	2003	Safety and therapeutic efficacy of artesunate suppositories for treatment of malaria in children in Papua New Guinea	The Pediatric infectious disease journal	22	3	251-6	BACKGROUND: Although suppositories of artemisinin derivatives may be a valuable option for treatment of malaria in children when circumstances prevent oral and parenteral therapy, few confirmatory data have been published. METHODS: We assessed the safety and efficacy of rectal artesunate in 47 children ages 5 to 10 years with uncomplicated malaria acquired in a hyperendemic area of Papua New Guin…	12634587	Asia	Papua New Guinea
Gasasira, A. F.;Dorsey, G.;Nzarubara, B.;Staedke, S. G.;Nassali, A.;Rosenthal, P. J.;Kamya, M. R.	2003	Comparative efficacy of aminoquinoline-antifolate combinations for the treatment of uncomplicated falciparum malaria in Kampala, Uganda	The American journal of tropical medicine and hygiene	68	2	127-32	Resistance to chloroquine (CQ) requires its replacement as first-line therapy for uncomplicated malaria in much of Africa. Combination therapy may improve efficacy and delay the selection of resistant malaria parasites. Combinations of sulfadoxine-pyrimethamine (SP) with 4-aminoquinolines offer affordable and available alternatives to CQ. We conducted a randomized, single-blinded trial to compare…	12641399	Africa	Uganda
Dugelay, F.;Adehossi, E.;Adamou, S.;Ousmane, I.;Parzy, D.;Delmont, J.;Parola, P.	2003	Efficacy of chloroquine in the treatment of uncomplicated, Plasmodium falciparum malaria in Niamey, Niger, in 2001	Annals of tropical medicine and parasitology	97	1	83-6		12662426	Africa	Niger
Gonzalez, I. J.;Padilla, J. O.;Giraldo, L. E.;Saravia, N. G.	2003	Efficacy of amodiaquine and sulfadoxine/pyrimethamine in the treatment of malaria not complicated by Plasmodium falciparum in Narino, Colombia, 1999-2002	Biomedica : revista del Instituto Nacional de Salud	23	1	38-46	The resurgence and spread of antimalarial drug resistance is one of the causes of the worldwide increase of malaria. In Colombia, uncomplicated Plasmodium falciparum malaria has been treated with a combination of amodiaquine (AQ) and sulfadoxine/pyrimethamine (SP) since 2000. The efficacy of these two antimalarials was evaluated after the implementation of the new malaria treatment scheme. In the…	12696398	S.America	Colombia
Bousema, J. T.;Gouagna, L. C.;Meutstege, A. M.;Okech, B. E.;Akim, N. I.;Githure, J. I.;Beier, J. C.;Sauerwein, R. W.	2003	Treatment failure of pyrimethamine-sulphadoxine and induction of Plasmodium falciparum gametocytaemia in children in western Kenya	Tropical medicine & international health	8	5	427-30	Sub-Saharan Africa faces increasing levels of resistance of Plasmodium falciparum parasites to the first-line drug pyrimethamine-sulphadoxine (SP). Successful treatment with SP is reported to induce gametocytes and drug resistance may further increase gametocytaemia after treatment. Treatment success, gametocyte prevalence and gametocyte density were determined in 224 asymptomatic children in wes…	12753638	Africa	Kenya
Bergeri, I.;Zoguereh, D. D.;Madji, N.;Barrau, K.;Delmont, J.;Namsenmo, A.;Ndoyo, J.	2003	In vivo evaluation of chloroquine therapeutic efficacy in uncomplicated Plasmodium falciparum malaria in Central African Republic ine 1997 and 1998	Bulletin de la Societe de pathologie exotique	96	1	29-34	The efficacy of oral chloroquine was assessed in 268 children aged from 6 to 59 months attending pediatric services in regional hospitals between September 1997 and December 1998, located in the five county towns of the sanitary regions of the Central African Republic. Chloroquine was prescribed at 25 mg per kg body weight, and administered over 3 days to patients suffering from uncomplicated mal…	12784590	Africa	Central Republic of Africa
Fernandopulle, B. M.;Weeraratne, C. L.;Weerasuriya, K.;Karunaweera, N. D.	2003	Efficacy of a five-day course of primaquine in preventing relapses in Plasmodium vivax malaria--a pilot study	The Ceylon medical journal	48	1	32		12795021	Asia	Sri Lanka
Nandy, A.;Addy, M.;Maji, A. K.;Bandyopadhyay, A. K.	2003	Monitoring the chloroquine sensitivity of Plasmodium vivax from Calcutta and Orissa, India	Annals of tropical medicine and parasitology	97	3	215-20	Chloroquine-resistant Plasmodium vivax malaria was first reported in India in 1995. This report led to the round-the-year monitoring, in Calcutta (West Bengal) and Mayurbhanj district (northern Orissa), of the in-vivo sensitivity of local P. vivax to chloroquine (CQ). Between January 1998 and December 2001, 800 cases with microscopically confirmed P. vivax malaria were enrolled in the study. Each…	12803853	Asia	India
Sowunmi, A.	2003	A randomized comparison of chloroquine and chloroquine plus ketotifen in the treatment of acute, uncomplicated, Plasmodium falciparum malaria in children	Annals of tropical medicine and parasitology	97	2	103-17	The increasing resistance of Plasmodium falciparum to chloroquine (CQ) has created urgent needs for the evaluation of alternative antimalarial drugs that are effective, safe, readily available and affordable. Ketotifen, a histamine H(1)-receptor antagonist that reverses CQ resistance in P. falciparum in vitro, may potentially enhance the effects of CQ in vivo. The effects of oral treatment with C…	12803865	Africa	Nigeria
da, S. R. S.;Pinto, A. Y.;Calvosa, V. S.;de, S. J. M.	2003	Short course schemes for vivax malaria treatment	Revista da Sociedade Brasileira de Medicina Tropical	36	2	235-9	with the objective of evaluating shortened therapeutic outlines effective in vivax malaria treatment, we accomplished an open, prospective study allocating 234 patients with vivax malaria distributed at random into eight therapeutic groups. Six groups used oral arthemisin as blood esquizonticide at different doses for one day and the other two groups received chloroquine in a single dose. The pri…	12806460	S.America	Brazil
Roche, J.;Guerra-Neira, A.;Raso, J.;Benito, A.	2003	Surveillance of in vivo resistance of Plasmodium falciparum to antimalarial drugs from 1992 to 1999 in Malabo (Equatorial Guinea)	The American journal of tropical medicine and hygiene	68	5	598-601	From 1992-1999, we have assessed the therapeutic efficacy of three malaria treatment regimens (chloroquine 25 mg/kg over three days, pyrimethamine/sulfadoxine 1.25/25 mg/kg in one dose, and quinine 25-30 mg/kg daily in three oral doses over a four-, five-, or seven-day period) in 1,189 children under age 10 at Malabo Regional Hospital in Equatorial Guinea. Of those children, 958 were followed up …	12812353	Africa	Equatorial Guinea
Marquino, W.;Huilca, M.;Calampa, C.;Falconi, E.;Cabezas, C.;Naupay, R.;Ruebush, T. K., 2nd	2003	Efficacy of mefloquine and a mefloquine-artesunate combination therapy for the treatment of uncomplicated Plasmodium falciparum malaria in the Amazon Basin of Peru	The American journal of tropical medicine and hygiene	68	5	608-12	In the Amazon Basin of Peru, more than 50% of patients with uncomplicated Plasmodium falciparum malaria fail to respond to treatment with chloroquine or sulfadoxine-pyrimethamine. To assist the National Malaria Control Program in identifying an alternative first-line therapy for this region, we conducted a trial of the safety and efficacy of mefloquine (MQ) compared with mefloquine-artesunate (MQ…	12812355	S.America	Peru
Suputtamongkol, Y.;Chindarat, S.;Silpasakorn, S.;Chaikachonpatd, S.;Lim, K.;Chanthapakajee, K.;Kaewkaukul, N.;Thamlikitkul, V.	2003	The efficacy of combined mefloquine-artesunate versus mefloquine-primaquine on subsequent development of Plasmodium falciparum gametocytemia	The American journal of tropical medicine and hygiene	68	5	620-3	An open randomized controlled study of mefloquine-artesunate and mefloquine-primaquine for the treatment of uncomplicated Plasmodium falciparum malaria was carried out in Kanchanaburi in the Saiyok District in western Thailand. Weekly parasite counts from thick and thin blood films were done for six weeks. The gametocyte carriage rate was calculated and compared between the two treatment groups. …	12812357	Asia	Thailand
Dubos, F.;Delattre, P.;Demar, M.;Carme, B.	2003	Efficacy and tolerance of mefloquine in the treatment of infants and children with Plasmodium falciparum malaria	Archives de pediatrie : organe officiel de la Societe francaise de pediatrie	10	1	25-30	Only a limited number of treatments are available for use in young children with malaria. OBJECTIVES: The aim of this study was to evaluate the efficacy and tolerance of mefloquine treatment in children, especially in infants of less than 15 kg, in an endemic area of malaria (French Guiana). METHOD: This five-years (1996-2000) retrospective study included 61 children aged six months to 16 years w…	12818776	S.America	Guyana
Sumawinata, I. W.;Bernadeta;Leksana, B.;Sutamihardja, A.;Purnomo;Subianto, B.;Sekartuti;Fryauff, D. J.;Baird, J. K.	2003	Very high risk of therapeutic failure with chloroquine for uncomplicated Plasmodium falciparum and P. vivax malaria in Indonesian Papua	The American journal of tropical medicine and hygiene	68	4	416-20	Chloroquine remains the first-line therapy for uncomplicated malaria in Indonesia. Among a series of trials of chloroquine for malaria on this archipelago conducted since 1990, we now report the highest risk of therapeutic failure yet observed. A clinical trial of standard chloroquine therapy for uncomplicated malaria at Arso PIR V in northeastern Indonesian Papua was conducted during 1995. We en…	12875290	Asia	Indonesia
[truncated: 575 more rows]

## Sheet: 2_Treatment Data
Accession Number	Author	Year	Title	Journal	Country	Region	Treatment arm name	Treatment arm code	AL, ASAQ or DP	Number of patients	Target	Available	WWARN ID
[truncated: 2,272 more rows]

[truncated: 6 more sheets: 3_Unpublished studies Included, 4_Studies in IPD Meta Analysis, 5_PPR in studies included, 6_PPR in trials with no IPD, 7_Classification of ROB, 8_Methods for ROB Apprasail]
