# Supplementary material for: Clinical determinants of early parasitological response to ACTs in African patients with uncomplicated falciparum malaria: a literature review and meta-analysis of individual patient data
Source: Springer Nature journal article supplement (doi:10.1186/s12916-015-0445-x), 2015-09-04
Supplement: MOESM2 [file 9759054]

## Study sites for clinical trials included in the WWARN ACT Africa Baseline Pooled Analysis

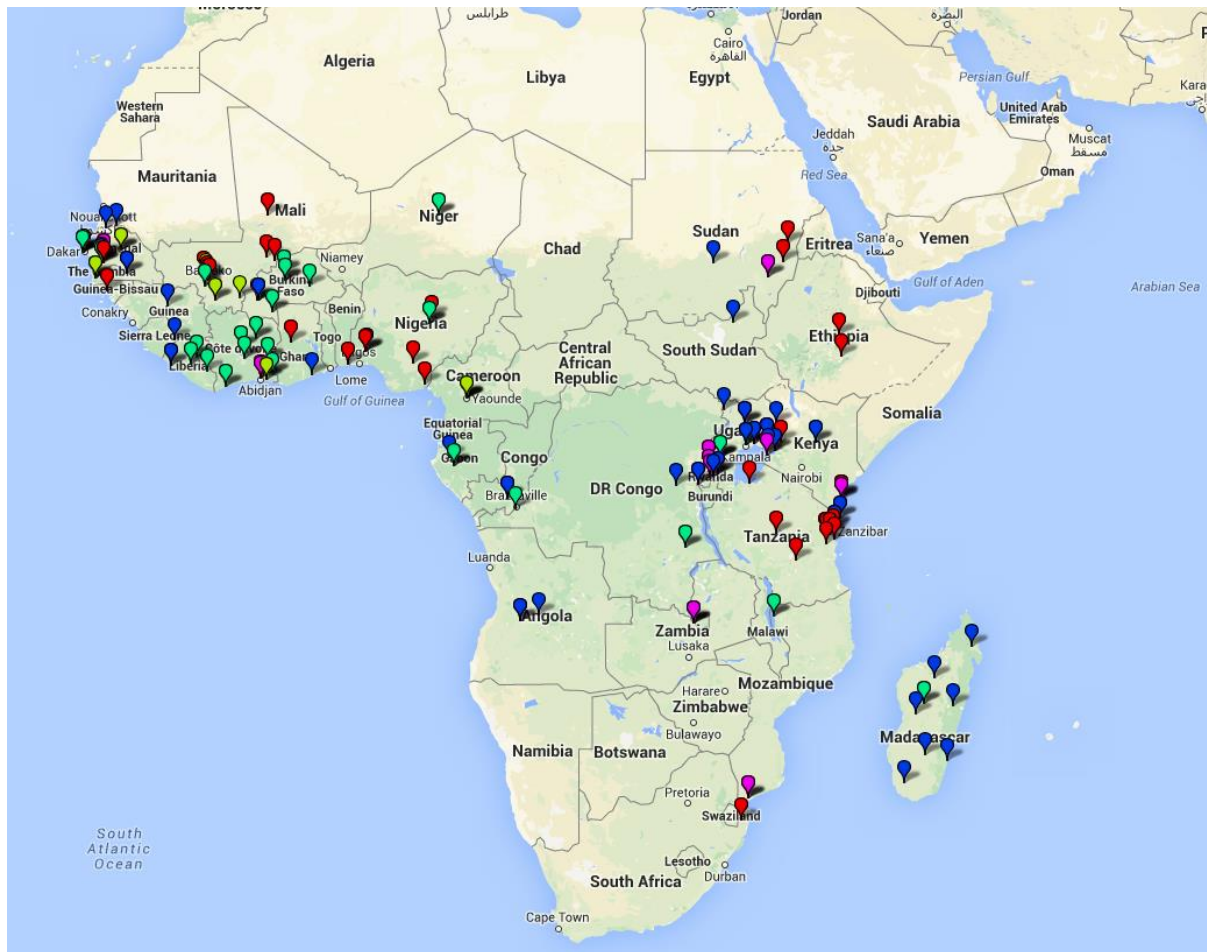

**Legend:** Coblistered Artesunate-Amodiaquine (ASAQ-Co-blisters), ASAQ Fixed Dose Combination (ASAQ-FDC), ASAQ- Loose formulation (ASAQ-Loose), Dihydroartemisinin Piperazine (DP), Artemether Lumefantrine (AL)
